# Supplementary material for: Oxymetalation or oxidative cyclization? mechanism of Pd-catalyzed annulation of enynones
Source: Royal Society of Chemistry journal article supplement (doi:10.1039/d1cc02744a), 2021-01-01
Supplement: d1cc02744a1.pdf [file d1cc02744a1.pdf]

# Electronic Supplementary Information

## Oxymetalation or Oxidative Cyclization? Mechanism of Pd-Catalyzed Annulation of Enynones

Hao Ni,<sup>a</sup> Xiaoqian He,<sup>a</sup> Kangbao Zhong,<sup>a</sup> Haohua Chen,<sup>a</sup> Wei Lai,<sup>a</sup> Zhuang Zhao,<sup>a</sup>

Zhen Zeng,<sup>a</sup> Ruopeng Bai,<sup>\*a</sup> Yu Lan <sup>\*ab</sup>

<sup>a</sup> School of Chemistry and Chemical Engineering, Chongqing Key Laboratory of Theoretical and Computational Chemistry, Chongqing University, Chongqing, 400030, P. R. China

<sup>b</sup> Green Catalysis Center, College of Chemistry, Zhengzhou University, Zhengzhou, 450001, P. R. China

*ruopeng@cqu.edu.cn*

*lanyu@cqu.edu.cn*

### Table of Content

|                                                                                                                        |    |
|------------------------------------------------------------------------------------------------------------------------|----|
| 1. Complete reference for Gaussian 09.....                                                                             | 2  |
| 2. Computational methods .....                                                                                         | 2  |
| 3. The critical electronic and geometric information for intermediate 8, 10, and transition state 9-ts.....            | 3  |
| 4. Detailed information of global reactivity index (GRI) calculation .....                                             | 4  |
| 5. M06-2X/def2-TZVP//B3LYP/def2-SVP calculated absolute energies, enthalpies, and free energies of all structures..... | 4  |
| 6. Free-energy profiles for coinage-metals-catalyzed cyclization of enynones.....                                      | 6  |
| 7. Free-energy profiles for transition-metals-mediated cyclization of enynones .....                                   | 6  |
| 8. Free-energy profiles for Pd-catalyzed enynones and isocyanide to ketenimine.....                                    | 7  |
| 9. Details about the electronic properties of intermediate 12.....                                                     | 9  |
| 10. B3LYP geometries for all the optimized compounds and transition states.....                                        | 11 |

## 1. Complete reference for Gaussian 09

Frisch, M. J.; Trucks, G. W.; Schlegel, H. B.; Scuseria, G. E.; Robb, M. A.; Cheeseman, J. R.; Scalmani, G.; Barone, V.; Mennucci, B.; Petersson, G. A.; Nakatsuji, H.; Caricato, M.; Li, X.; Hratchian, H. P.; Izmaylov, A. F.; Bloino, J.; Zheng, G.; Sonnenberg, J. L.; Hada, M.; Ehara, M.; Toyota, K.; Fukuda, R.; Hasegawa, J.; Ishida, M.; Nakajima, T.; Honda, Y.; Kitao, O.; Nakai, H.; Vreven, T.; Montgomery, Jr., J. A.; Peralta, J. E.; Ogliaro, F.; Bearpark, M.; Heyd, J. J.; Brothers, E.; Kudin, K. N.; Staroverov, V. N.; Keith, T.; Kobayashi, R.; Normand, J.; Raghavachari, K.; Rendell, A.; Burant, J. C.; Iyengar, S. S.; Tomasi, J.; Cossi, M.; Rega, N.; Millam, J. M.; Klene, M.; Knox, J. E.; Cross, J. B.; Bakken, V.; Adamo, C.; Jaramillo, J.; Gomperts, R.; Stratmann, R. E.; Yazyev, O.; Austin, A. J.; Cammi, R.; Pomelli, C.; Ochterski, J. W.; Martin, R. L.; Morokuma, K.; Zakrzewski, V. G.; Voth, G. A.; Salvador, P.; Dannenberg, J. J.; Dapprich, S.; Daniels, A. D.; Farkas, O.; Foresman, J. B.; Ortiz, J. V.; Cioslowski, J.; and Fox, D. J. Gaussian 09, revision D.01; Gaussian, Inc.: Wallingford, CT, 2013.

## 2. Computational methods.

All DFT calculations were carried out using Gaussian 09 program. In the gas phase, all geometry optimizations were performed with the B3LYP functional<sup>1</sup> using the def2-SVP basis set<sup>2</sup> for all atoms. The vibrational frequencies were computed at the same level of theory as for the geometry optimizations to confirm whether each optimized structure is an energy minimum or a transition state, and to evaluate the zero-point vibrational energy (ZPVE) and thermal corrections. The single-point energies and solvent effects were computed with the M06-2X<sup>3</sup> functional using the def2-TZVP basis set<sup>2</sup> for all atoms, based on the gas-phase optimized structures. The solvation energies were evaluated by a self-consistent reaction field (SCRF) using the SMD implicit solvent model.<sup>4</sup>

The global reactivity index (GRI) values were also calculated using B3LYP functional and the def2-SVP basis set for all atoms. The  $\omega$  (electrophilicity index)<sup>5</sup> values were calculated according to eq 1. In eq 1, the  $\mu$  (electronic chemical potential)

value could be obtained by  $\mu = (\epsilon_{\text{HOMO}} + \epsilon_{\text{LUMO}})/2$  and the  $\eta$  (chemical hardness) value could be obtained by  $\eta = \epsilon_{\text{HOMO}} - \epsilon_{\text{LUMO}}$ .<sup>6</sup>

$$\omega = (\mu)^2/2\eta \quad (1)$$

$$N = \epsilon_{\text{HOMO}}(\text{Nu}) - \epsilon_{\text{HOMO}}(\text{TCE}) \quad (2)$$

The  $\epsilon_{\text{HOMO}}$  values refer to the orbital energies of the highest occupied molecular orbital (HOMO), and the corresponding orbital and the  $\epsilon_{\text{LUMO}}$  values refer to the orbital energies of the lowest unoccupied molecular orbital (LUMO). The N (nucleophilicity index)<sup>7</sup> values were calculated with eq 2. In eq 2, tetracyanoethylene (TCE) with the lowest HOMO energy among the organic molecules serves as a reference.<sup>8</sup>

The  $\omega_k$  (local electrophilicity) values were calculated according to eq 3.<sup>9</sup> In eq 3, the  $f_k^+$  (Fukui function) value could be obtained by  $f_k^+ = q_k(N+1) - q_k(N)$ .<sup>10</sup>

$$\omega_k = \omega \cdot f_k^+ \quad (3)$$

### 3. The critical electronic and geometric information for intermediate 8, 10, and transition state 9-ts.

**Table S1.** Optimized geometries for intermediate 8 and 10. Bond lengths are given in angstroms.

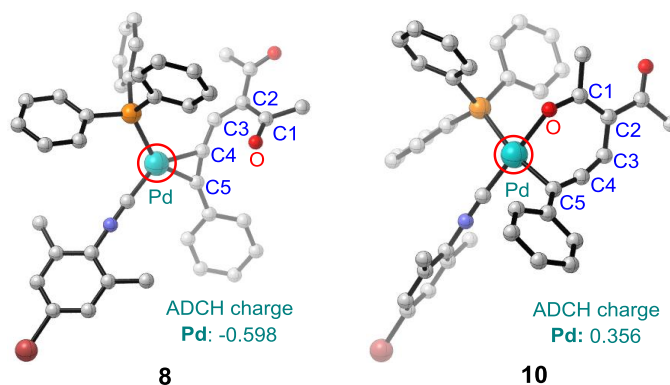

| Complex | 8    | 9-ts | 10   |
|---------|------|------|------|
| Pd-O    | 4.07 | 2.34 | 2.19 |
| O-C1    | 1.22 | 1.26 | 1.28 |
| C1-C2   | 1.50 | 1.45 | 1.44 |
| C2-C3   | 1.38 | 1.43 | 1.44 |
| C3-C4   | 1.41 | 1.36 | 1.35 |

|       |      |      |      |
|-------|------|------|------|
| C4-C5 | 1.28 | 1.28 | 1.29 |
| C5-Pd | 2.08 | 2.12 | 2.12 |

#### 4. Detailed information of reactivity index calculation.

**Table S2.** Nucleophilicity ( $N$ , eV) and electrophilicity ( $\omega$ , eV) values of the complexes **2a**, **2b**, **2c**, and **8**, involved in the reaction pathway.

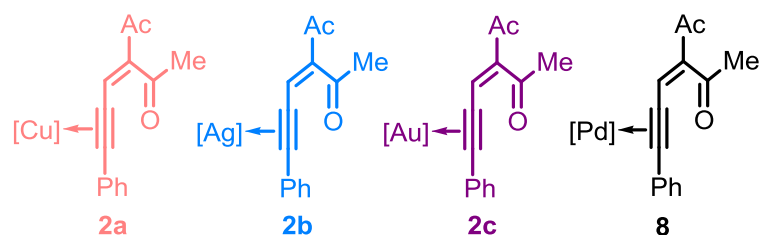

| Complex   | $E_{\text{HOMO}}$ | $E_{\text{LUMO}}$ | $E_{\text{TCE}}$ | $\eta$ | $\mu$  | $\omega$ | $f_k^+$ | $\omega_k$ | $N$  |
|-----------|-------------------|-------------------|------------------|--------|--------|----------|---------|------------|------|
| <b>2a</b> | -9.201            | -5.659            | -9.275           | 3.542  | -7.430 | 7.79     | 0.027   | 0.21       | 0.07 |
| <b>2b</b> | -9.201            | -5.627            | -9.275           | 3.574  | -7.414 | 7.69     | 0.023   | 0.18       | 0.07 |
| <b>2c</b> | -9.183            | -5.688            | -9.275           | 3.495  | -7.435 | 7.91     | 0.018   | 0.15       | 0.09 |
| <b>8</b>  | -5.493            | -2.036            | -9.275           | 3.456  | -3.765 | 2.05     | 0.000   | 0.00       | 3.78 |

#### 5. M06-2X/def2-TZVP//B3LYP/def2-SVP calculated absolute energies, enthalpies, and free energies of all structures.

**Table S3.** M06-2X/def2-TZVP//B3LYP/def2-SVP calculated absolute energies, enthalpies, and free energies of all structures.

| Geometry | $E_{(\text{elec-B3LYP})}^1$ | $H_{(\text{corr-B3LYP})}^2$ | $G_{(\text{corr-B3LYP})}^3$ | $E_{(\text{solv-M06-2X})}^4$ | $IF^5$          |
|----------|-----------------------------|-----------------------------|-----------------------------|------------------------------|-----------------|
| 1        | -690.591188                 | 0.234804                    | 0.170736                    | -691.073745                  | -               |
| [Cu]     | -2799.383354                | 0.603009                    | 0.503834                    | -2800.365407                 | -               |
| [Ag]     | -1306.053747                | 0.602917                    | 0.499930                    | -1306.788359                 | -               |
| [Au]     | -1294.821784                | 0.603349                    | 0.502138                    | -1295.495220                 | -               |
| 2a       | -3490.029630                | 0.839722                    | 0.698307                    | -3491.466611                 | -               |
| 2b       | -1996.685878                | 0.839519                    | 0.695761                    | -1997.885245                 | -               |
| 2c       | -1985.468288                | 0.839840                    | 0.697773                    | -1986.603417                 | -               |
| 3a-ts    | -3490.027050                | 0.838573                    | 0.700712                    | -3491.452966                 | 235.84 <i>i</i> |
| 3b-ts    | -1996.684407                | 0.838392                    | 0.697143                    | -1997.874069                 | 215.57 <i>i</i> |
| 3c-ts    | -1985.468279                | 0.838857                    | 0.699842                    | -1986.601027                 | 71.18 <i>i</i>  |
| 4a       | -3490.059593                | 0.841075                    | 0.703468                    | -3491.477720                 | -               |
| 4b       | -1996.715089                | 0.840878                    | 0.700305                    | -1997.898408                 | -               |
| 4c       | -1985.510595                | 0.841397                    | 0.702778                    | -1986.635148                 | -               |
| 5        | -2199.428812                | 0.586342                    | 0.470857                    | -2200.416511                 | -               |

|                                   |              |          |           |              |                 |
|-----------------------------------|--------------|----------|-----------|--------------|-----------------|
| 6                                 | -2890.035223 | 0.823101 | 0.675743  | -2891.514953 | -               |
| 7                                 | -2976.072523 | 0.155113 | 0.105448  | -2976.676045 | -               |
| 8                                 | -4830.407985 | 0.687446 | 0.546419  | -4831.924189 | -               |
| 9-ts                              | -4830.398898 | 0.686112 | 0.552443  | -4831.922138 | 21.32 <i>i</i>  |
| 10                                | -4830.400923 | 0.687160 | 0.550824  | -4831.924189 | -               |
| 11-ts                             | -4830.382527 | 0.685717 | 0.548965  | -4831.906562 | 304.19 <i>i</i> |
| 12                                | -4830.418798 | 0.688234 | 0.555634  | -4831.936693 | -               |
| 13-ts                             | -4830.394553 | 0.686493 | 0.550735  | -4831.908094 | 275.58 <i>i</i> |
| 14                                | -4830.430623 | 0.688925 | 0.553080  | -4831.958307 | -               |
| PPh <sub>3</sub>                  | -1035.715362 | 0.290555 | 0.227673  | -1036.261684 | -               |
| 15                                | -3666.741548 | 0.394513 | 0.306563  | -3667.825416 | -               |
| 16-ts                             | -4830.381252 | 0.686077 | 0.549200  | -4831.899962 | 409.77 <i>i</i> |
| 17                                | -4830.393037 | 0.687993 | 0.553384  | -4831.920765 | -               |
| 18-ts                             | -4830.381452 | 0.686862 | 0.550771  | -4831.903155 | 291.78 <i>i</i> |
| 19-ts                             | -5866.071327 | 0.978087 | 0.802112  | -5868.158521 | 412.68 <i>i</i> |
| 20                                | -5866.128385 | 0.981613 | 0.809200  | -5868.225136 | -               |
| 21                                | -690.591188  | 0.234804 | 0.170736  | -691.075204  | -               |
| CuOTf                             | -2601.209583 | 0.038457 | -0.008250 | -2602.074733 | -               |
| AgOTf                             | -1107.886113 | 0.038325 | -0.009469 | -1108.503766 | -               |
| IPr-Au <sup>+</sup>               | -1294.821784 | 0.603349 | 0.502138  | -1295.501162 | -               |
| 22a                               | -3291.866901 | 0.275413 | 0.185036  | -3293.169579 | -               |
| 22b                               | -1798.516498 | 0.275042 | 0.181482  | -1799.594920 | -               |
| 22c                               | -1985.468288 | 0.839840 | 0.697773  | -1986.609071 | -               |
| 23a-ts                            | -3291.860717 | 0.274064 | 0.186232  | -3293.163846 | 271.56 <i>i</i> |
| 23b-ts                            | -1798.510538 | 0.273887 | 0.184240  | -1799.584959 | 304.49 <i>i</i> |
| 23c-ts                            | -1985.468279 | 0.838857 | 0.699842  | -1986.606656 | 71.18 <i>i</i>  |
| 24a                               | -3291.884481 | 0.276854 | 0.189229  | -3293.186478 | -               |
| 24b                               | -1798.538139 | 0.276625 | 0.187348  | -1799.607502 | -               |
| 24c                               | -1985.510595 | 0.841397 | 0.702778  | -1986.640624 | -               |
| 25-ts                             | -5866.113739 | 0.979354 | 0.802619  | -5868.196615 | 96.02 <i>i</i>  |
| 26                                | -5866.158298 | 0.982693 | 0.807472  | -5868.248050 | -               |
| 27-ts                             | -2890.011555 | 0.821493 | 0.674187  | -2891.483211 | 455.18 <i>i</i> |
| 28                                | -2890.034945 | 0.823722 | 0.673963  | -2891.500679 | -               |
| Cu <sup>+</sup> -PPh <sub>3</sub> | -2675.850995 | 0.294191 | 0.225067  | -2676.637997 | -               |
| Ag <sup>+</sup> -PPh <sub>3</sub> | -1182.532506 | 0.294190 | 0.224688  | -1183.065969 | -               |
| Pd-PPh <sub>3</sub>               | -1163.662495 | 0.293665 | 0.224883  | -1164.110809 | -               |
| 29a                               | -3366.499900 | 0.530589 | 0.416754  | -3367.732477 | -               |
| 29b                               | -1873.163101 | 0.529593 | 0.417701  | -1874.158227 | -               |
| 29c                               | -1854.294713 | 0.529976 | 0.416266  | -1855.214184 | -               |
| 30a-ts                            | -3366.498167 | 0.529360 | 0.418545  | -3367.721435 | 213.15 <i>i</i> |
| 30b-ts                            | -1873.162338 | 0.529358 | 0.416884  | -1874.147795 | 184.07 <i>i</i> |
| 30c-ts                            | -1854.275347 | 0.528459 | 0.416699  | -1855.184647 | 438.47 <i>i</i> |
| 31a                               | -3366.531399 | 0.532080 | 0.421361  | -3367.744290 | -               |
| 31b                               | -1873.194207 | 0.531889 | 0.420464  | -1874.171265 | -               |

|     |              |          |          |              |   |
|-----|--------------|----------|----------|--------------|---|
| 31c | -1854.297423 | 0.530832 | 0.419686 | -1855.208882 | - |
|-----|--------------|----------|----------|--------------|---|

<sup>1</sup>The electronic energy calculated by B3LYP in gas phase. <sup>2</sup>The thermal correction to enthalpy calculated by B3LYP in gas phase. <sup>3</sup>The thermal correction to Gibbs free energy calculated by B3LYP in gas phase. <sup>4</sup>The electronic energy calculated by M06-2X in tetrahydrofuran or dichloromethane solvent. <sup>5</sup>The B3LYP calculated imaginary frequencies for the transition states.

## 6. Free-energy profiles for coinage-metals-catalyzed cyclization of enynones.

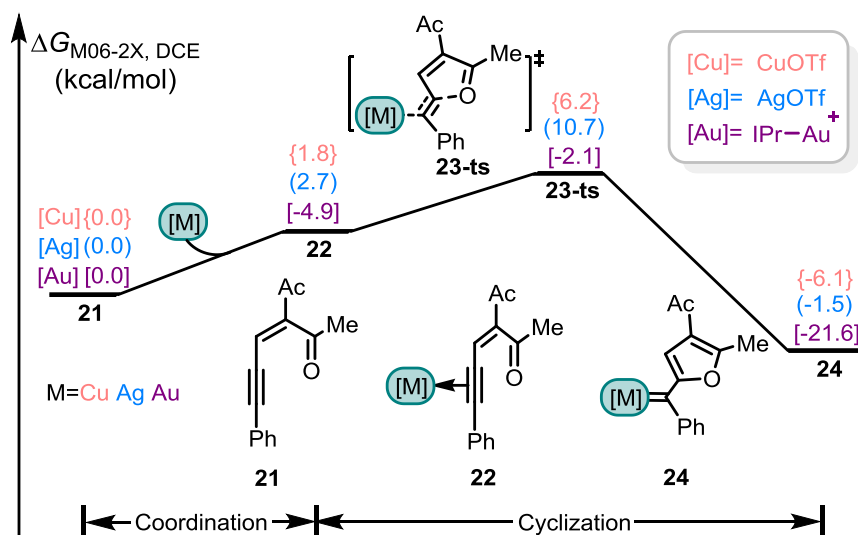

**Figure S1.** Free-energy profiles for the CuOTf, AgOTf, or IPr-Au<sup>+</sup>(I)-catalyzed cyclization of enynone to afford metal carbene complexes. The energies are in kcal/mol and represent the relative free energies, which were calculated using the M06-2X/def2-TZVP//B3LYP/def2-SVP method in dichloromethane solvent.

CuOTf(I), AgOTf(I), or IPrAu<sup>+</sup>(I) were used as active catalysts,<sup>11</sup> enynone **21** can be activated by the coordination in corresponding complex **22**. An intramolecular nucleophilic attack via five membered ring type transition state **23-ts** leads to the formation of furanyl-carbene intermediates **24**. DFT calculations found that the activation free energy for this step is only 6.2, 10.7, or -2.1 kcal/mol, when Cu(I), Ag(I), or Au(I) was used respectively.

## 7. Free-energy profiles for transition-metals-mediated cyclization of enynones.

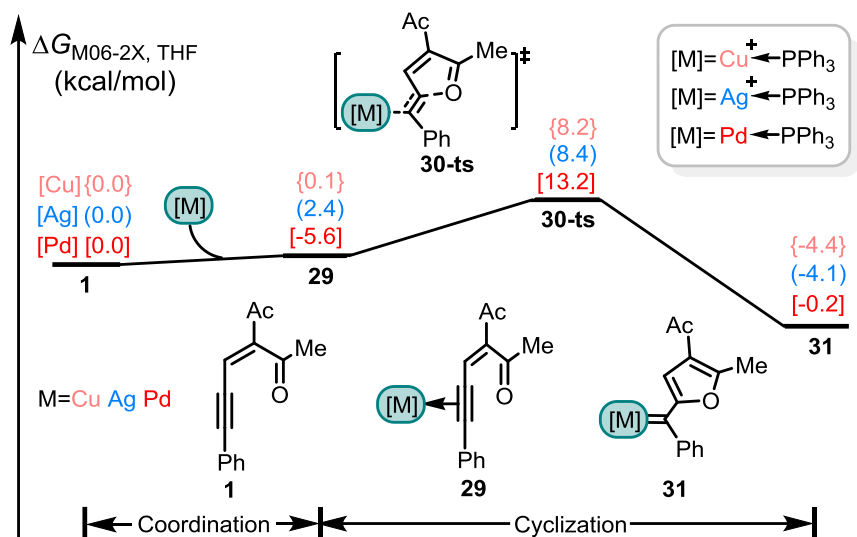

**Figure S2.** Free-energy profiles for the Cu, Ag, or Pd-mediated cyclization of enynones to afford metal carbene complexes. The energies are in kcal/mol and represent the relative free energies, which were calculated using the M06-2X/def2-TZVP//B3LYP/def2-SVP method in tetrahydrofuran solvent.

As shown in Figure S2, we calculated the free energy profiles for the cyclization process by using Cu, Ag or Pd with PPh<sub>3</sub> ligand. The coordination of enynone **1** onto Cu, Ag or Pd forms corresponding complex **29**. Subsequently, an intramolecular nucleophilic attack would take place via a five-membered ring-type transition state **30-ts** to afford the furan metal-carbene intermediate **31**. The calculated free energy barrier for this step is 8.2 or 8.4 kcal/mol, when Cu or Ag was used. However, the free energy barrier for this step with Pd was as high as 13.2 kcal/mol, which was evidently higher than that with coinage metals. This free-energy profiles reveals that the ligand cannot affect the reactivity in direct cyclization pathway.

## 8. Free-energy profiles for Pd-catalyzed enynones and isocyanide to ketenimine.

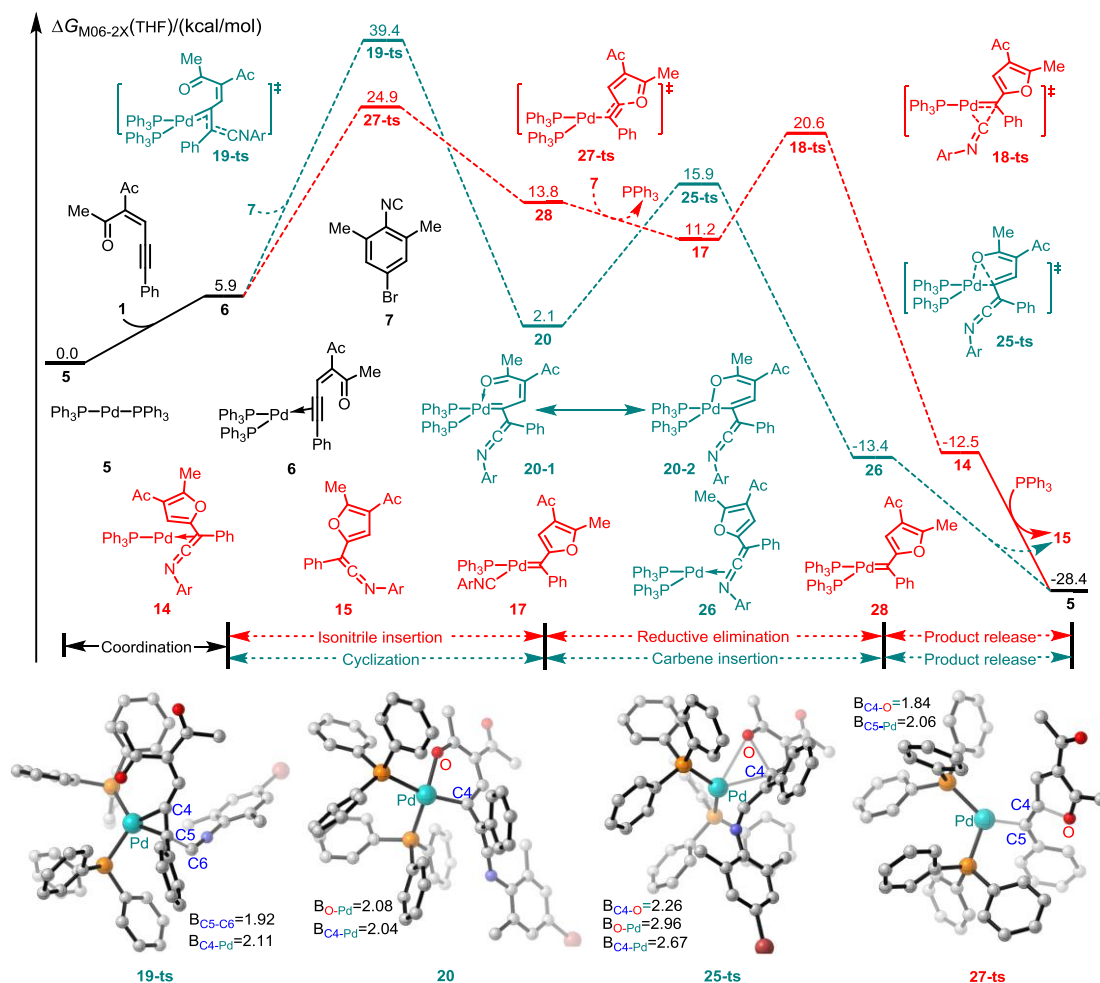

**Figure S3.** Gibbs energy profiles for Pd-catalyzed enynes and isocyanide. Values are given in kcal/mol and represent the relative free energies calculated by using the M06-2X/def2-TZVP//B3LYP/def2-SVP method in tetrahydrofuran solvent. Optimized geometries of transition states **19-ts**, **25-ts**, **27-ts** and intermediate **20**. Bond lengths are given in angstroms.

The coordination of enyne **1** onto Pd forms complex **6** with endergonic 5.9 kcal/mol. Subsequent an intramolecular nucleophilic attack would take place via transition state **19-ts** with an energy barrier of 33.5 kcal/mol to afford six-membered palladacycle **20**, with a free energy release of 3.8 kcal/mol. In geometry of that intermediate, the bond lengths of Pd-O and Pd-C4 are 2.08 and 2.04 Å, which can be considered as two resonance structures of Pd(0)-carbene **20-1** and Pd(II)-vinyl **20-2**. The following allylic reductive elimination can occur via transition states **25-ts** to irreversibly afford a ketenimine-coordinated Pd(0) complex **26**. After ligand dissociation, active species **5** can be regenerated with the release of furanyl ketenimine



product **15**. Alternatively, an intramolecular nucleophilic attack would take place via transition state **27-ts** to afford furan ring in Pd-carbene intermediate **28** with a free energy barrier of only 19.0 kcal/mol, which is much higher than the metal of copper, silver and gold in Figure 1. Then the Pd-carbene intermediate **28** can react with enynone through ligand exchange to afford complex **17** with exothermic 2.6 kcal/mol. The Subsequent migratory insertion could occur via a three-membered ring concerted transition state **18-ts** with an energy barrier of only 9.4 kcal/mol to form intermediate **14**, which undergoes the ligand exchange with phosphine to obtain furanyl ketenimine product **15** with the regeneration of active species **5**.

### 9. Details about the electronic properties of intermediate **12**.

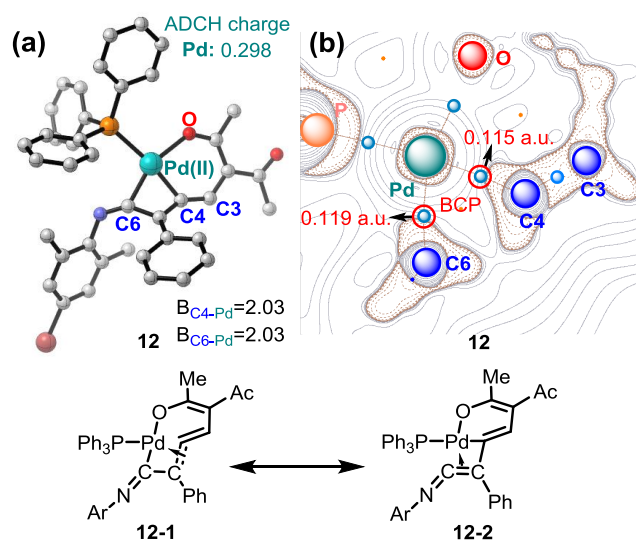

**Figure S4.** (a) Optimized structure of intermediate **12**. (b) Laplacian plots of electron density for intermediate **12** on the C4-Pd-C6 plane.

We gave the critical atomic charge and geometric information for the intermediate **12** in Figure S4 (a). The bond lengths of Pd-C6 and Pd-C4 are 2.03 and 2.03 Å. Moreover, the ADCH charge and localized orbital bonding analysis (LOBA) determine that the oxidation state of Pd is +2. To further investigate the two resonance structures of intermediate **12**, the Laplacians of the electron density on the plane defined by Pd, C4 and C6 of intermediate **12** were plotted using Atoms-in-Molecules (AIM) analysis. As shown in Figure S4 (b), the electron densities at the BCPs (bond critical points) of

Pd-C6 and Pd-C4 bond were calculated to 0.119 a.u. and 0.115 a.u.. It indicates that the bond strengths of those two bonds are close, therefore, both of resonance structures **12-1** and **12-2** contribute to this intermediate.

**Reference:**

1. A. D. Becke, *J. Chem. Phys.*, 1993, **98**, 5648.
2. F. Weigend and R. Ahlrichs, *Phys. Chem. Chem. Phys.*, 2005, **7**, 3297.
3. Y. Zhao and D. G. Truhlar, *Theor. Chem. Acc.*, 2008, **120**, 215.
4. A. V. Marenich, C. J. Cramer and D. G. Truhlar, *J. Phys. Chem. B.*, 2009, **113**, 6378.
5. R. G. Parr, L. v. Szentpály and S. Liu, *J. Am. Chem. Soc.*, 1999, **121**, 1922.
6. R. G. Parr and R. G. Pearson, *J. Am. Chem. Soc.*, 2002, **105**, 7512.
7. L. R. Domingo and P. Perez, *Org. Biomol. Chem.*, 2011, **9**, 7168.
8. L. R. Domingo, E. Chamorro and P. Perez, *J. Org. Chem.*, 2008, **73**, 4615.
9. P. K. Chattaraj, S. Duley and L. R. Domingo, *Org. Biomol. Chem.*, 2012, **10**, 2855.
10. W. Yang and W. J. Mortier, *J. Am. Chem. Soc.*, 1986, **108**, 5708.
- 11: (a) J. Ma, H. Jiang and S. Zhu, *Org. Lett.*, 2014, **16**, 4472; (b) Q. Yang, Y. Zhu and G. Deng, *Tetrahedron*, 2020, **76**, 13519.

## 10. B3LYP geometries for all the optimized compounds and transition states.

**1**

|   |             |             |             |   |             |             |             |
|---|-------------|-------------|-------------|---|-------------|-------------|-------------|
| C | -3.82138900 | -0.69406900 | 0.00699500  | C | 5.09272900  | 0.00025600  | -0.47574400 |
| O | -4.79289200 | 0.04158200  | 0.02471300  | H | 6.13199200  | 0.00021500  | -0.81288400 |
| C | -2.42483300 | -0.15293100 | 0.00166100  | C | 4.43277300  | 1.20933100  | -0.26146700 |
| C | -1.37292800 | -1.03605300 | 0.00033800  | H | 4.96405300  | 2.14696300  | -0.43604300 |
| H | -1.60854400 | -2.10471500 | -0.00067800 | C | 3.10070000  | 1.24188400  | 0.17541200  |
| C | -2.13871800 | 1.33315600  | -0.00024500 | C | 2.38753200  | 2.57939700  | 0.35612500  |
| O | -0.98208200 | 1.71469900  | 0.02121600  | H | 1.44679500  | 2.39318500  | 0.89660200  |
| C | -4.03965300 | -2.20393200 | -0.00833900 | C | 2.01584600  | 3.17840800  | -1.01401000 |
| H | -3.59707600 | -2.67174800 | -0.90194000 | H | 2.91346500  | 3.38889100  | -1.61680600 |
| H | -3.59767600 | -2.68845700 | 0.87670400  | H | 1.45956300  | 4.12139400  | -0.89411400 |
| H | -5.12217500 | -2.38241700 | -0.00946300 | H | 1.38118300  | 2.48458200  | -1.59207900 |
| C | -3.26407500 | 2.34387300  | -0.03293400 | C | 3.19649600  | 3.57853500  | 1.20007600  |
| H | -3.90995400 | 2.19398700  | -0.91020400 | H | 4.12505500  | 3.88888000  | 0.69615200  |
| H | -3.92341300 | 2.23132600  | 0.83983900  | H | 3.47064100  | 3.15293700  | 2.17763600  |
| H | -2.81245500 | 3.34471900  | -0.05020800 | H | 2.60511000  | 4.48978300  | 1.38045900  |
| C | 0.00359100  | -0.76543700 | -0.00023600 | C | 2.38772500  | -2.57873100 | 0.35732500  |
| C | 1.22397600  | -0.66591200 | -0.00112200 | H | 1.44688000  | -2.39232300 | 0.89755300  |
| C | 2.61404100  | -0.36538500 | -0.00079200 | C | 3.19668600  | -3.57719100 | 1.20209900  |
| C | 3.59320600  | -1.38339700 | -0.00726000 | H | 2.60547000  | -4.48846700 | 1.38290700  |
| C | 3.02570300  | 0.98801200  | 0.00628100  | H | 3.47048300  | -3.15090700 | 2.17945400  |
| C | 4.94731000  | -1.05358400 | -0.00667400 | H | 4.12545300  | -3.88759600 | 0.69861000  |
| H | 3.27605200  | -2.42832500 | -0.01271700 | C | 2.01625400  | -3.17871600 | -1.01243100 |
| C | 4.38192300  | 1.30630400  | 0.00678600  | H | 1.38139900  | -2.48543700 | -1.59096900 |
| H | 2.26077600  | 1.76730000  | 0.01133700  | H | 1.46019100  | -4.12176300 | -0.89192600 |
| C | 5.34417800  | 0.28891900  | 0.00030400  | H | 2.91389700  | -3.38937700 | -1.61513300 |
| H | 5.69960300  | -1.84615700 | -0.01168900 | C | -2.45837100 | 0.00002000  | 0.38281900  |
| H | 4.69344000  | 2.35375600  | 0.01230700  | C | -3.10045300 | -1.24163300 | 0.17538000  |
| H | 6.40722800  | 0.54311000  | 0.00070400  | C | -4.43254200 | -1.20932700 | -0.26147200 |

**[Cu]**

|   |             |             |             |   |             |             |             |
|---|-------------|-------------|-------------|---|-------------|-------------|-------------|
| N | 1.08237200  | 0.00035100  | 0.83849100  | H | -4.96366400 | -2.14704700 | -0.43604300 |
| N | -1.08236700 | 0.00018400  | 0.83849200  | C | -5.09272700 | -0.00037100 | -0.47573000 |
| C | 0.00000300  | 0.00028600  | 0.02294700  | H | -6.13199300 | -0.00052600 | -0.81286400 |
| C | 0.68172400  | 0.00027300  | 2.16665400  | C | -4.43306600 | 1.20877900  | -0.26095800 |
| H | 1.39653100  | 0.00040700  | 2.98495800  | H | -4.96457900 | 2.14635100  | -0.43514200 |
| C | -0.68171700 | 0.00016200  | 2.16665500  | C | -3.10099800 | 1.24148000  | 0.17591800  |
| H | -1.39652400 | 0.00018100  | 2.98495900  | C | -2.38812600 | 2.57908700  | 0.35711200  |
| C | 2.45837700  | 0.00035300  | 0.38281700  | H | -1.44739100 | 2.39290100  | 0.89760000  |
| C | 3.10076000  | -1.24122900 | 0.17587700  | C | -2.01646200 | 3.17859900  | -1.01281200 |
| C | 4.43284000  | -1.20877500 | -0.26098400 | H | -2.91408900 | 3.38908500  | -1.61559400 |
| H | 4.96419400  | -2.14643600 | -0.43516900 | H | -1.38161300 | 2.48509600  | -1.59105300 |
|   |             |             |             | H | -1.46039400 | 4.12167000  | -0.89257300 |
|   |             |             |             | C | -3.19735500 | 3.57779800  | 1.20131200  |

|             |             |             |             |             |             |             |             |
|-------------|-------------|-------------|-------------|-------------|-------------|-------------|-------------|
| H           | -2.60615100 | 4.48909400  | 1.38204800  | C           | 3.09707300  | -3.34736300 | 1.67543800  |
| H           | -3.47152200 | 3.15183900  | 2.17870800  | H           | 2.55530600  | -4.28378500 | 1.88226200  |
| H           | -4.12591800 | 3.88814600  | 0.69739600  | H           | 3.11972800  | -2.75615200 | 2.60415600  |
| C           | -2.38711900 | -2.57904100 | 0.35633700  | H           | 4.13613200  | -3.61369300 | 1.42526000  |
| H           | -1.44626700 | -2.39260700 | 0.89654500  | C           | 2.34528100  | -3.42771800 | -0.75042100 |
| C           | -3.19580600 | -3.57793200 | 1.20086700  | H           | 1.82949100  | -2.89330100 | -1.56563700 |
| H           | -3.46956900 | -3.15201500 | 2.17839200  | H           | 1.79634000  | -4.36322900 | -0.55947700 |
| H           | -2.60440600 | -4.48916100 | 1.38131000  | H           | 3.34701200  | -3.70177600 | -1.11701900 |
| H           | -4.12457400 | -3.88833200 | 0.69737800  | C           | -2.46164900 | 0.00970300  | 0.46535700  |
| C           | -2.01563900 | -3.17852200 | -1.01363500 | C           | -3.10476900 | -1.23433300 | 0.27641500  |
| H           | -1.45935500 | -4.12148200 | -0.89348100 | C           | -4.43940400 | -1.20541800 | -0.15360100 |
| H           | -1.38097900 | -2.48491600 | -1.59200700 | H           | -4.97280300 | -2.14533400 | -0.31075700 |
| H           | -2.91327900 | -3.38918300 | -1.61634200 | C           | -5.10036700 | 0.00131600  | -0.37759800 |
| Cu          | -0.00001700 | -0.00092500 | -1.88263100 | H           | -6.14134400 | -0.00194500 | -0.70938900 |
| <b>[Ag]</b> |             |             |             | C           | -4.44070000 | 1.21233400  | -0.17340700 |
| N           | 1.08248600  | 0.01457800  | 0.91055500  | H           | -4.97525000 | 2.14889600  | -0.34580800 |
| N           | -1.08243100 | 0.01457900  | 0.91058300  | C           | -3.10579200 | 1.24990300  | 0.25488900  |
| C           | 0.00004300  | 0.00132300  | 0.09696100  | C           | -2.42181600 | 2.59491400  | 0.48827600  |
| C           | 0.68159400  | 0.03568200  | 2.23791600  | H           | -1.37571200 | 2.40180900  | 0.77092800  |
| H           | 1.39655500  | 0.04782900  | 3.05588200  | C           | -2.39162000 | 3.45319000  | -0.78894800 |
| C           | -0.68147500 | 0.03567500  | 2.23796500  | H           | -3.40475500 | 3.72938800  | -1.12088400 |
| H           | -1.39642100 | 0.04781100  | 3.05596800  | H           | -1.90241000 | 2.92383100  | -1.62325300 |
| C           | 2.46167300  | 0.00970700  | 0.46530800  | H           | -1.83779400 | 4.38830400  | -0.61065200 |
| C           | 3.10477000  | -1.23431000 | 0.27632700  | C           | -3.07211400 | 3.35837000  | 1.65717000  |
| C           | 4.43940000  | -1.20540700 | -0.15370600 | H           | -2.53478000 | 4.30053800  | 1.84900600  |
| H           | 4.97279900  | -2.14532200 | -0.31089100 | H           | -3.05991600 | 2.76589000  | 2.58531600  |
| C           | 5.10037600  | 0.00133000  | -0.37768800 | H           | -4.12144400 | 3.61251500  | 1.43905200  |
| H           | 6.14135600  | -0.00192700 | -0.70949600 | C           | -2.41883400 | -2.57490400 | 0.52887800  |
| C           | 4.44070300  | 1.21234500  | -0.17345800 | H           | -1.38331100 | -2.37496700 | 0.84372300  |
| H           | 4.97525700  | 2.14891000  | -0.34585200 | C           | -3.09719100 | -3.34755500 | 1.67529600  |
| C           | 3.10580300  | 1.24989000  | 0.25486300  | H           | -3.12006700 | -2.75644200 | 2.60407600  |
| C           | 2.42185600  | 2.59490800  | 0.48826500  | H           | -2.55537900 | -4.28395300 | 1.88211700  |
| H           | 1.37576300  | 2.40183300  | 0.77094400  | H           | -4.13617900 | -3.61395100 | 1.42489400  |
| C           | 2.39163200  | 3.45318500  | -0.78895700 | C           | -2.34496200 | -3.42755500 | -0.75044900 |
| H           | 3.40475900  | 3.72937500  | -1.12092300 | H           | -1.79604700 | -4.36308500 | -0.55952400 |
| H           | 1.83782300  | 4.38830600  | -0.61064800 | H           | -1.82900500 | -2.89301200 | -1.56548200 |
| H           | 1.90239600  | 2.92383500  | -1.62324900 | H           | -3.34661700 | -3.70156300 | -1.11729300 |
| C           | 3.07218700  | 3.35836800  | 1.65713600  | Ag          | -0.00010600 | -0.04446300 | -2.00838700 |
| H           | 4.12150800  | 3.61252100  | 1.43898700  | <b>[Au]</b> |             |             |             |
| H           | 3.06002500  | 2.76589400  | 2.58528000  | Au          | 0.00008900  | 0.03955800  | -1.71165500 |
| H           | 2.53485700  | 4.30053300  | 1.84898900  | N           | -1.08949000 | -0.01991400 | 1.07906600  |
| C           | 2.41887400  | -2.57489300 | 0.52880600  | N           | 1.08942900  | -0.02010000 | 1.07910800  |
| H           | 1.38328700  | -2.37499900 | 0.84343400  | C           | -0.00001700 | -0.00467700 | 0.27940500  |

|   |             |             |             |           |             |             |             |
|---|-------------|-------------|-------------|-----------|-------------|-------------|-------------|
| C | -0.68169800 | -0.04448900 | 2.40345900  | C         | 2.44585100  | -3.47244000 | -0.60835100 |
| H | -1.39756700 | -0.05865000 | 3.22056100  | H         | 3.47043500  | -3.75396300 | -0.89772500 |
| C | 0.68158300  | -0.04464500 | 2.40348900  | H         | 1.98865200  | -2.95218700 | -1.46536100 |
| H | 1.39743000  | -0.05895000 | 3.22061500  | H         | 1.88524400  | -4.40505800 | -0.43861100 |
| C | -2.47450100 | -0.01427400 | 0.64241700  | C         | 3.04014700  | -3.34904000 | 1.85967600  |
| C | -3.11686500 | 1.23136900  | 0.46681200  | H         | 2.50095200  | -4.29208400 | 2.04146200  |
| C | -4.45816100 | 1.20201500  | 0.05884600  | H         | 2.99300000  | -2.74798300 | 2.78129800  |
| H | -4.99412000 | 2.14184500  | -0.08896000 | H         | 4.09771700  | -3.59950700 | 1.68083300  |
| C | -5.12176300 | -0.00481000 | -0.15648200 | C         | 2.42793300  | 2.57093300  | 0.71426700  |
| H | -6.16780000 | -0.00112000 | -0.47189100 | H         | 1.38053200  | 2.37240500  | 0.98991300  |
| C | -4.45913300 | -1.21650200 | 0.03361700  | C         | 3.06971400  | 3.32241300  | 1.89550900  |
| H | -4.99604500 | -2.15250400 | -0.13347900 | H         | 3.05772700  | 2.71841400  | 2.81629800  |
| C | -3.11765100 | -1.25559100 | 0.43974900  | H         | 2.52662200  | 4.25925500  | 2.09671600  |
| C | -2.42964800 | -2.60043200 | 0.66135100  | H         | 4.11823700  | 3.58538700  | 1.68442200  |
| H | -1.37291400 | -2.40927400 | 0.90488900  | C         | 2.40130500  | 3.44248000  | -0.55412200 |
| C | -2.44605900 | -3.47258400 | -0.60661100 | H         | 1.84628300  | 4.37518200  | -0.36716600 |
| H | -3.47058500 | -3.75355000 | -0.89670700 | H         | 1.91571100  | 2.92061100  | -1.39463600 |
| H | -1.88618100 | -4.40550200 | -0.43611900 | H         | 3.41595700  | 3.72255600  | -0.87802200 |
| H | -1.98784400 | -2.95291700 | -1.46342900 |           |             |             |             |
| C | -3.04141900 | -3.34815300 | 1.86113800  | <b>2a</b> |             |             |             |
| H | -4.09890200 | -3.59869400 | 1.68185900  | C         | 5.18568200  | 1.26845700  | -0.97090400 |
| H | -2.99475200 | -2.74663500 | 2.78247900  | O         | 6.21086400  | 1.54915600  | -0.38432000 |
| H | -2.50233600 | -4.29111800 | 2.04367900  | C         | 3.90582200  | 2.00180100  | -0.65747600 |
| C | -2.42738800 | 2.57123600  | 0.71272700  | C         | 2.71127600  | 1.40215300  | -0.94699600 |
| H | -1.37972400 | 2.37270600  | 0.98734500  | H         | 2.73003500  | 0.41826500  | -1.42342000 |
| C | -3.06808400 | 3.32251000  | 1.89470800  | C         | 3.90710900  | 3.36429400  | 0.00821700  |
| H | -2.52497200 | 4.25944200  | 2.09544400  | O         | 2.83606100  | 3.92582500  | 0.15976600  |
| H | -3.05503500 | 2.71842300  | 2.81542800  | C         | 5.17113200  | 0.17417000  | -2.02331400 |
| H | -4.11688000 | 3.58526800  | 1.68469600  | H         | 4.63305700  | -0.71388100 | -1.65287900 |
| C | -2.40197900 | 3.44301100  | -0.55551600 | H         | 4.68396100  | 0.50317400  | -2.95394900 |
| H | -1.91748700 | 2.92118900  | -1.39668600 | H         | 6.20986900  | -0.11376200 | -2.22874800 |
| H | -1.84648500 | 4.37551600  | -0.36898200 | C         | 5.18921800  | 4.01362800  | 0.45684900  |
| H | -3.41691000 | 3.72348200  | -0.87820900 | H         | 5.69287000  | 3.39897800  | 1.21676000  |
| C | 2.47445900  | -0.01456000 | 0.64255300  | H         | 5.90401800  | 4.09726500  | -0.37569200 |
| C | 3.11716400  | 1.23103400  | 0.46775600  | H         | 4.94829500  | 5.00700100  | 0.85614800  |
| C | 4.45845900  | 1.20158700  | 0.05980500  | C         | 1.41834000  | 1.92012900  | -0.68894800 |
| H | 4.99463500  | 2.14137400  | -0.08739500 | C         | 0.27491900  | 2.40748000  | -0.58862500 |
| C | 5.12176100  | -0.00524500 | -0.15628900 | C         | -0.75606100 | 3.39046600  | -0.41602000 |
| H | 6.16777900  | -0.00160600 | -0.47169300 | C         | -2.10923300 | 3.12628600  | -0.71875700 |
| C | 4.45884100  | -1.21689000 | 0.03303600  | C         | -0.37581000 | 4.66938800  | 0.05694500  |
| H | 4.99549800  | -2.15292800 | -0.13465700 | C         | -3.06413600 | 4.12738400  | -0.55534700 |
| C | 3.11734400  | -1.25591400 | 0.43914300  | H         | -2.40671400 | 2.14284500  | -1.08839300 |
| C | 2.42902300  | -2.60073200 | 0.65994200  | C         | -1.34308000 | 5.65824100  | 0.21560700  |
| H | 1.37220700  | -2.40949500 | 0.90309600  | H         | 0.67430600  | 4.85866200  | 0.28443800  |

|   |             |             |             |           |             |             |             |
|---|-------------|-------------|-------------|-----------|-------------|-------------|-------------|
| C | -2.68410800 | 5.39144700  | -0.08918400 | C         | -5.39549400 | 0.74156400  | -0.73603200 |
| H | -4.10923300 | 3.92168100  | -0.79549400 | H         | -6.25232100 | 1.37427000  | -0.98081600 |
| H | -1.05016600 | 6.64660300  | 0.57699300  | C         | -4.99488800 | 0.59744200  | 0.59134700  |
| H | -3.43640400 | 6.17416600  | 0.03524400  | H         | -5.54273300 | 1.12259600  | 1.37666000  |
| N | -0.11920100 | -2.46438000 | 0.57801800  | C         | -3.90420700 | -0.21409900 | 0.93723000  |
| N | -2.11517400 | -1.73615500 | 0.21350400  | C         | -3.49409200 | -0.34839500 | 2.40178100  |
| C | -0.80972500 | -1.35713100 | 0.19582800  | H         | -2.64067500 | -1.04083900 | 2.45439400  |
| C | -0.98018200 | -3.52187100 | 0.83249100  | C         | -3.01648400 | 0.99564500  | 2.98110400  |
| H | -0.62091000 | -4.49647900 | 1.15085400  | H         | -3.82244000 | 1.74646100  | 2.98780700  |
| C | -2.24078300 | -3.06183500 | 0.60122700  | H         | -2.17898300 | 1.41084900  | 2.39867800  |
| H | -3.20688000 | -3.55278300 | 0.67696600  | H         | -2.67685100 | 0.86630900  | 4.02098800  |
| C | 1.32055300  | -2.53937100 | 0.69622400  | C         | -4.62201600 | -0.95775800 | 3.25418600  |
| C | 2.06266600  | -3.01826000 | -0.40740500 | H         | -4.28190200 | -1.10518600 | 4.29135700  |
| C | 3.45664000  | -3.08421600 | -0.26328300 | H         | -4.94585800 | -1.93434000 | 2.86138700  |
| H | 4.06548100  | -3.45723100 | -1.08957300 | H         | -5.50679100 | -0.30237800 | 3.28735200  |
| C | 4.07953500  | -2.69470300 | 0.92282200  | C         | -2.89969200 | -1.48338700 | -2.60300700 |
| H | 5.16669400  | -2.75763500 | 1.01335200  | H         | -2.18861200 | -2.19273600 | -2.15352400 |
| C | 3.31936200  | -2.23673600 | 1.99758400  | C         | -3.86247000 | -2.30629500 | -3.47651100 |
| H | 3.82155100  | -1.94413800 | 2.92195500  | H         | -4.44685200 | -3.01884100 | -2.87400000 |
| C | 1.92101100  | -2.15583300 | 1.91628200  | H         | -3.29891700 | -2.88059800 | -4.22856600 |
| C | 1.11601800  | -1.65141800 | 3.11149000  | H         | -4.57360100 | -1.66572900 | -4.02105200 |
| H | 0.04996100  | -1.81884000 | 2.89556000  | C         | -2.07878300 | -0.49523000 | -3.45217400 |
| C | 1.30677600  | -0.13559800 | 3.30478200  | H         | -1.52847200 | -1.02520700 | -4.24574200 |
| H | 2.35660000  | 0.11323600  | 3.52806900  | H         | -1.34317700 | 0.04590700  | -2.83430600 |
| H | 0.69001200  | 0.23111600  | 4.14047400  | H         | -2.72519100 | 0.25431400  | -3.93614600 |
| H | 1.01618200  | 0.42190400  | 2.39938400  | Cu        | -0.08307200 | 0.39358100  | -0.24400500 |
| C | 1.43870000  | -2.42571100 | 4.40121600  |           |             |             |             |
| H | 2.47543200  | -2.25954400 | 4.73352000  | <b>2b</b> |             |             |             |
| H | 1.29866200  | -3.50975600 | 4.26887100  | C         | 5.66045100  | 0.38049600  | -0.57922800 |
| H | 0.77802100  | -2.09550400 | 5.21812300  | O         | 6.80227200  | 0.63790500  | -0.25532000 |
| C | 1.40844300  | -3.42963300 | -1.72529700 | C         | 4.56037700  | 1.38479800  | -0.35912600 |
| H | 0.32324900  | -3.49839900 | -1.55771100 | C         | 3.25504800  | 0.99838000  | -0.50305900 |
| C | 1.87397200  | -4.81299400 | -2.21006000 | H         | 3.05238000  | -0.03725300 | -0.78606300 |
| H | 1.30797400  | -5.11164100 | -3.10623200 | C         | 4.83952900  | 2.81778300  | 0.03761300  |
| H | 1.72120000  | -5.58446200 | -1.43964300 | O         | 3.88406400  | 3.57197600  | 0.12503800  |
| H | 2.94099900  | -4.81851100 | -2.48286500 | C         | 5.32672300  | -0.95876300 | -1.21464700 |
| C | 1.62748900  | -2.35631100 | -2.80834000 | H         | 4.67196500  | -1.56126500 | -0.56437900 |
| H | 1.21934400  | -1.38170700 | -2.49386700 | H         | 4.81699400  | -0.83414300 | -2.18291800 |
| H | 1.12579400  | -2.64054700 | -3.74692900 | H         | 6.26739900  | -1.50280200 | -1.36595000 |
| H | 2.69864200  | -2.22410100 | -3.03140200 | C         | 6.23486800  | 3.30742800  | 0.31276100  |
| C | -3.23220100 | -0.87696000 | -0.11417800 | H         | 6.69623200  | 2.73517200  | 1.13066000  |
| C | -3.62204300 | -0.76070700 | -1.46804600 | H         | 6.88647200  | 3.14892700  | -0.55944700 |
| C | -4.71400200 | 0.07263600  | -1.75263200 | H         | 6.18081800  | 4.37412300  | 0.56507800  |
| H | -5.04525100 | 0.19027500  | -2.78651100 | C         | 2.11056500  | 1.80703800  | -0.32331300 |

|   |             |             |             |           |             |             |             |
|---|-------------|-------------|-------------|-----------|-------------|-------------|-------------|
| C | 1.05739300  | 2.47250200  | -0.24045800 | C         | -2.87302100 | 1.28000300  | 3.20848000  |
| C | 0.25162200  | 3.65482400  | -0.11162700 | H         | -1.98229600 | 1.67648200  | 2.69558500  |
| C | -1.15203100 | 3.64089000  | -0.26573300 | H         | -2.56203200 | 0.92150500  | 4.20240900  |
| C | 0.91233900  | 4.87546000  | 0.16852800  | H         | -3.56796800 | 2.11951600  | 3.36772500  |
| C | -1.87872000 | 4.82293200  | -0.14365500 | C         | 0.53508700  | -3.02989200 | 0.40506300  |
| H | -1.67122700 | 2.70559300  | -0.48826900 | C         | 1.13969900  | -3.04336200 | 1.68214100  |
| C | 0.17190400  | 6.04844900  | 0.28919600  | C         | 2.45712300  | -3.51888300 | 1.76345200  |
| H | 1.99700900  | 4.87587500  | 0.28262000  | H         | 2.95809900  | -3.54872800 | 2.73338500  |
| C | -1.21985700 | 6.02636000  | 0.13417500  | C         | 3.13446800  | -3.96750200 | 0.63037700  |
| H | -2.96350300 | 4.80517000  | -0.26697400 | H         | 4.15601300  | -4.34499000 | 0.72114700  |
| H | 0.68371500  | 6.98916400  | 0.50441400  | C         | 2.50798600  | -3.94958000 | -0.61572400 |
| H | -1.79332400 | 6.95165100  | 0.22902800  | H         | 3.04686800  | -4.31690500 | -1.49191700 |
| N | -2.55541300 | -1.29155600 | 0.03932700  | C         | 1.19304400  | -3.48245400 | -0.76108100 |
| N | -0.82847200 | -2.55958100 | 0.28967700  | C         | 0.52920500  | -3.50039900 | -2.13607300 |
| C | -1.19806300 | -1.26866100 | 0.08423800  | H         | -0.48103800 | -3.07725200 | -2.03147800 |
| C | -3.03204500 | -2.58264800 | 0.21491300  | C         | 1.28207900  | -2.61840000 | -3.14804600 |
| H | -4.09372100 | -2.81233600 | 0.21080700  | H         | 2.30000300  | -2.99367500 | -3.34008800 |
| C | -1.94213200 | -3.38298900 | 0.37348200  | H         | 1.36674400  | -1.57824600 | -2.79323600 |
| H | -1.85771400 | -4.45363000 | 0.53661200  | H         | 0.75165400  | -2.60123700 | -4.11319600 |
| C | -3.40271700 | -0.13427400 | -0.15646000 | C         | 0.36531100  | -4.93820800 | -2.66267200 |
| C | -3.87091800 | 0.55836100  | 0.98329200  | H         | -0.16883700 | -4.93672700 | -3.62594600 |
| C | -4.70752300 | 1.66256600  | 0.76372700  | H         | -0.20539900 | -5.56465300 | -1.95950900 |
| H | -5.09536600 | 2.22016000  | 1.61883200  | H         | 1.34054600  | -5.42416200 | -2.82485900 |
| C | -5.06034000 | 2.05608600  | -0.52669800 | C         | 0.42119400  | -2.58264800 | 2.94785200  |
| H | -5.72035600 | 2.91483800  | -0.67267100 | H         | -0.59284400 | -2.26167700 | 2.66600300  |
| C | -4.58354600 | 1.35162500  | -1.63152100 | C         | 0.26450000  | -3.73305900 | 3.95946900  |
| H | -4.87515900 | 1.66806500  | -2.63524900 | H         | -0.26247600 | -4.59287600 | 3.51714900  |
| C | -3.74699000 | 0.23617800  | -1.47613800 | H         | -0.31119600 | -3.39653300 | 4.83611900  |
| C | -3.26731900 | -0.52813200 | -2.70802700 | H         | 1.24068700  | -4.09120500 | 4.32313800  |
| H | -2.61344400 | -1.34491000 | -2.36769600 | C         | 1.11717700  | -1.36747600 | 3.58678300  |
| C | -2.42826700 | 0.36148800  | -3.64256100 | H         | 0.55001200  | -1.01685500 | 4.46339800  |
| H | -3.02171400 | 1.19150000  | -4.05731100 | H         | 1.19696200  | -0.52779600 | 2.87725100  |
| H | -2.04662500 | -0.22647400 | -4.49220900 | H         | 2.13481100  | -1.61367400 | 3.92932200  |
| H | -1.56385500 | 0.79907800  | -3.11734800 | Ag        | 0.04717000  | 0.42642500  | -0.10389700 |
| C | -4.44482400 | -1.17493600 | -3.46095700 |           |             |             |             |
| H | -5.13724300 | -0.41613400 | -3.85860400 | <b>2c</b> |             |             |             |
| H | -5.02502900 | -1.84463000 | -2.80711900 | C         | -5.65774000 | 0.56852500  | -0.33173200 |
| H | -4.07712500 | -1.76749500 | -4.31353300 | O         | -6.79657600 | 0.96892800  | -0.19473500 |
| C | -3.52545000 | 0.13813100  | 2.40975800  | C         | -4.49855000 | 1.51662500  | -0.20204100 |
| H | -2.78658700 | -0.67532500 | 2.35380500  | C         | -3.21290300 | 1.04721700  | -0.25201600 |
| C | -4.76110400 | -0.42036400 | 3.14045200  | H         | -3.05357000 | -0.02481100 | -0.38726300 |
| H | -4.48824800 | -0.76721300 | 4.14970900  | C         | -4.67760000 | 3.00009000  | -0.00747800 |
| H | -5.20421800 | -1.27041900 | 2.59830200  | O         | -3.65981600 | 3.67493400  | 0.04587700  |
| H | -5.54427900 | 0.34646700  | 3.25216600  | C         | -5.38874800 | -0.89363000 | -0.64133000 |

|    |             |             |             |   |             |             |             |
|----|-------------|-------------|-------------|---|-------------|-------------|-------------|
| H  | -4.83801000 | -1.01052700 | -1.58818000 | H | 5.41286700  | 0.08305900  | 3.43557000  |
| H  | -4.79467200 | -1.37481200 | 0.15177300  | H | 5.08296300  | -1.50014900 | 2.69909000  |
| H  | -6.35604400 | -1.40494400 | -0.72168800 | H | 4.30741800  | -1.05295100 | 4.23901800  |
| C  | -6.03257800 | 3.63711000  | 0.11706900  | C | 3.28279800  | -0.46462800 | -2.65043800 |
| H  | -6.64550100 | 3.42678400  | -0.77199900 | H | 2.58059400  | -1.26428400 | -2.37057200 |
| H  | -6.58913200 | 3.20835100  | 0.96336500  | C | 4.44960900  | -1.12963000 | -3.40415900 |
| H  | -5.89677000 | 4.71828300  | 0.24758300  | H | 4.07867300  | -1.66098200 | -4.29479400 |
| C  | -2.03306200 | 1.81402500  | -0.14763700 | H | 4.98017700  | -1.85774200 | -2.77083100 |
| C  | -0.91196400 | 2.39017300  | -0.10329500 | H | 5.18703300  | -0.38577000 | -3.74508500 |
| C  | -0.09454700 | 3.57645500  | -0.04939300 | C | 2.51271700  | 0.50970800  | -3.55974000 |
| C  | 1.31425400  | 3.52148200  | -0.13445800 | H | 1.65815200  | 0.96477000  | -3.03422000 |
| C  | -0.73525900 | 4.83209300  | 0.08469000  | H | 2.12520300  | -0.01857800 | -4.44517400 |
| C  | 2.06370100  | 4.69434600  | -0.08834100 | H | 3.15698900  | 1.32679200  | -3.92121200 |
| H  | 1.81808900  | 2.55928500  | -0.24180900 | C | -0.64136500 | -3.07077500 | 0.23244100  |
| C  | 0.02763000  | 5.99570700  | 0.13196300  | C | -1.27308000 | -3.44418300 | -0.97566300 |
| H  | -1.82233000 | 4.87026500  | 0.14790100  | C | -2.58185700 | -3.94037800 | -0.88650200 |
| C  | 1.42392200  | 5.93195900  | 0.04555700  | H | -3.10119100 | -4.25095200 | -1.79567400 |
| H  | 3.15212300  | 4.64216400  | -0.15739700 | C | -3.22726000 | -4.05874800 | 0.34434300  |
| H  | -0.47080500 | 6.96213900  | 0.23597700  | H | -4.24348700 | -4.45804100 | 0.38936900  |
| H  | 2.01509900  | 6.85027200  | 0.08208700  | C | -2.57695800 | -3.68103700 | 1.51834100  |
| Au | -0.03495300 | 0.36644400  | -0.04352800 | H | -3.09296000 | -3.78644300 | 2.47504000  |
| N  | 2.48692000  | -1.35005500 | 0.03648200  | C | -1.26560400 | -3.18220700 | 1.49455700  |
| N  | 0.72797400  | -2.60264100 | 0.17618500  | C | -0.57532300 | -2.80428000 | 2.80281700  |
| C  | 1.12995900  | -1.31125500 | 0.05665600  | H | 0.43311000  | -2.43563600 | 2.56215900  |
| C  | 2.93382600  | -2.65841000 | 0.14459700  | C | -1.31139900 | -1.66038400 | 3.52281400  |
| H  | 3.99146500  | -2.90558000 | 0.14888200  | H | -2.32649800 | -1.95831700 | 3.83008300  |
| C  | 1.82782100  | -3.44636500 | 0.23228000  | H | -1.40127100 | -0.77186600 | 2.87765300  |
| H  | 1.72081000  | -4.52284800 | 0.32915600  | H | -0.76550300 | -1.36463400 | 4.43255400  |
| C  | 3.36968700  | -0.20680800 | -0.07871600 | C | -0.40096200 | -4.02703500 | 3.72234700  |
| C  | 3.76240300  | 0.21372800  | -1.36940200 | H | 0.15069900  | -3.74647300 | 4.63342300  |
| C  | 4.64877700  | 1.29811900  | -1.44645300 | H | 0.15743800  | -4.83422600 | 3.22291100  |
| H  | 4.97943700  | 1.65169800  | -2.42528400 | H | -1.37217200 | -4.44001900 | 4.03787600  |
| C  | 5.12495000  | 1.92494300  | -0.29555700 | C | -0.58244400 | -3.35978000 | -2.33467500 |
| H  | 5.82438700  | 2.76025200  | -0.38114700 | H | 0.38951400  | -2.86425900 | -2.19093700 |
| C  | 4.71993500  | 1.48486400  | 0.96404100  | C | -0.29775600 | -4.76302600 | -2.90301600 |
| H  | 5.10572100  | 1.98364200  | 1.85563000  | H | 0.30863200  | -5.36729000 | -2.21024600 |
| C  | 3.83343100  | 0.40722600  | 1.10661100  | H | 0.24955600  | -4.68909900 | -3.85602700 |
| C  | 3.42884900  | -0.06361900 | 2.50129400  | H | -1.23050600 | -5.31639100 | -3.09677700 |
| H  | 2.68169500  | -0.86333600 | 2.38686800  | C | -1.37685900 | -2.50432200 | -3.33692100 |
| C  | 2.76089000  | 1.05867200  | 3.31514100  | H | -0.82108100 | -2.40888100 | -4.28295300 |
| H  | 3.45837600  | 1.88601400  | 3.52000200  | H | -1.55779900 | -1.48930900 | -2.94890000 |
| H  | 2.41650500  | 0.67257200  | 4.28749400  | H | -2.35338500 | -2.95408200 | -3.57694400 |
| H  | 1.88994300  | 1.47752500  | 2.78684800  |   |             |             |             |
| C  | 4.62668400  | -0.66785000 | 3.25768800  |   |             |             |             |

**3a-ts**



|   |             |             |             |   |             |             |             |
|---|-------------|-------------|-------------|---|-------------|-------------|-------------|
| C | 5.54100600  | 1.03756100  | -0.45697500 | C | 0.71509000  | -2.27630100 | 2.92916300  |
| O | 6.62160900  | 1.58873200  | -0.37203900 | H | -0.34286400 | -2.23395100 | 2.62985300  |
| C | 4.28181800  | 1.82081000  | -0.27401900 | C | 1.12557100  | -0.85172100 | 3.34643900  |
| C | 3.02769100  | 1.26610000  | -0.27420600 | H | 2.17737000  | -0.81648600 | 3.67343000  |
| H | 2.89021600  | 0.18999000  | -0.40407700 | H | 0.50241000  | -0.49384700 | 4.18129300  |
| C | 4.24822300  | 3.29282800  | -0.07241000 | H | 1.01035700  | -0.14393700 | 2.50903600  |
| O | 3.12070800  | 3.78216400  | 0.03601300  | C | 0.80712500  | -3.25603000 | 4.11125800  |
| C | 5.43839500  | -0.44413300 | -0.75646100 | H | 1.82514900  | -3.30672700 | 4.52833800  |
| H | 4.92754900  | -0.98413400 | 0.05624700  | H | 0.51407300  | -4.27546600 | 3.81609600  |
| H | 4.86820600  | -0.62382900 | -1.68208900 | H | 0.13868600  | -2.93303100 | 4.92469200  |
| H | 6.45336500  | -0.84416300 | -0.87323100 | C | 1.14034200  | -3.32822500 | -2.10906300 |
| C | 5.47017100  | 4.15356000  | -0.00052600 | H | 0.08960200  | -3.00666700 | -2.05948600 |
| H | 6.12537100  | 3.81666700  | 0.81679700  | C | 1.14761900  | -4.77766700 | -2.62819400 |
| H | 6.06972400  | 4.04166300  | -0.91647700 | H | 0.66305000  | -4.83469300 | -3.61562600 |
| H | 5.16931200  | 5.19870100  | 0.14424300  | H | 0.60901200  | -5.45504700 | -1.94732500 |
| C | 1.86368900  | 2.04141400  | -0.11186300 | H | 2.17294700  | -5.16480300 | -2.73955500 |
| C | 0.61622800  | 2.32502100  | -0.04736000 | C | 1.85114500  | -2.37958700 | -3.09117900 |
| C | -0.30101900 | 3.43826900  | 0.07172100  | H | 1.80216100  | -1.33352900 | -2.74783200 |
| C | -1.69730900 | 3.23208000  | -0.01206400 | H | 1.37781800  | -2.42847900 | -4.08454100 |
| C | 0.18556900  | 4.75441300  | 0.26755400  | H | 2.91274100  | -2.64483600 | -3.22047200 |
| C | -2.57974300 | 4.30435300  | 0.09503000  | C | -3.30926200 | -0.50465000 | -0.31001300 |
| H | -2.08867400 | 2.22493200  | -0.17133300 | C | -3.58398300 | -0.10109100 | -1.63657000 |
| C | -0.70498500 | 5.81823800  | 0.37790500  | C | -4.58054700 | 0.86867800  | -1.82002100 |
| H | 1.25998000  | 4.92070100  | 0.32848200  | H | -4.81792000 | 1.20992400  | -2.82960700 |
| C | -2.08598000 | 5.59869500  | 0.29182800  | C | -5.28260500 | 1.39668000  | -0.73712800 |
| H | -3.65493900 | 4.12865100  | 0.02465500  | H | -6.06458900 | 2.14102400  | -0.90682900 |
| H | -0.32105200 | 6.82950300  | 0.53048000  | C | -4.99636500 | 0.97209500  | 0.55971300  |
| H | -2.77834900 | 6.43983400  | 0.37744700  | H | -5.55790600 | 1.39063500  | 1.39758000  |
| N | -0.42710000 | -2.52681600 | 0.23754200  | C | -4.00352700 | 0.01235800  | 0.80740500  |
| N | -2.30487500 | -1.52193600 | -0.08820700 | C | -3.72986300 | -0.44424600 | 2.23837600  |
| C | -0.96817800 | -1.29434900 | 0.03446600  | H | -2.85449300 | -1.11067400 | 2.21905000  |
| C | -1.40919200 | -3.50720100 | 0.24290500  | C | -3.37683500 | 0.73314400  | 3.16444600  |
| H | -1.17647600 | -4.55764200 | 0.39229800  | H | -4.22422400 | 1.42585800  | 3.28781600  |
| C | -2.59472100 | -2.87219900 | 0.03600600  | H | -2.52426700 | 1.31305500  | 2.77753200  |
| H | -3.60888600 | -3.25469000 | -0.03475900 | H | -3.11030800 | 0.36290400  | 4.16700300  |
| C | 0.97799100  | -2.81575300 | 0.41903100  | C | -4.91098100 | -1.25851400 | 2.79948600  |
| C | 1.73021700  | -3.22980400 | -0.70395600 | H | -4.68004800 | -1.62557300 | 3.81206300  |
| C | 3.07360800  | -3.57145100 | -0.48803300 | H | -5.14205800 | -2.13072700 | 2.16804700  |
| H | 3.68415200  | -3.90710000 | -1.32908600 | H | -5.82494000 | -0.64694100 | 2.86729500  |
| C | 3.64048300  | -3.50305200 | 0.78428900  | C | -2.83203800 | -0.65674000 | -2.84321400 |
| H | 4.68575600  | -3.78629700 | 0.93071900  | H | -2.22142000 | -1.50536800 | -2.49940300 |
| C | 2.87588600  | -3.08322200 | 1.87222100  | C | -3.78065000 | -1.19838700 | -3.92649400 |
| H | 3.33360900  | -3.03689100 | 2.86249900  | H | -4.46494000 | -1.95998800 | -3.52148000 |
| C | 1.52480400  | -2.73746900 | 1.72019100  | H | -3.20201600 | -1.66077400 | -4.74162000 |

|              |             |             |             |   |             |             |             |
|--------------|-------------|-------------|-------------|---|-------------|-------------|-------------|
| H            | -4.39393800 | -0.40070900 | -4.37443800 | C | 0.99528100  | -3.42163900 | -1.12313900 |
| C            | -1.86564500 | 0.39550800  | -3.41827900 | C | 2.27748800  | -3.98749900 | -1.06335200 |
| H            | -1.28214300 | -0.02494800 | -4.25271100 | H | 2.78237900  | -4.27222400 | -1.98903700 |
| H            | -1.15805300 | 0.74734200  | -2.64949900 | C | 2.91335700  | -4.20847000 | 0.15811500  |
| H            | -2.40856800 | 1.27586700  | -3.79796300 | H | 3.90761500  | -4.66147600 | 0.18005100  |
| Cu           | -0.07964500 | 0.43547300  | -0.03755600 | C | 2.27998500  | -3.86476300 | 1.35172400  |
| <b>3b-ts</b> |             |             |             |   |             |             |             |
| C            | 5.82586100  | 0.18338500  | -0.11617300 | C | 0.99611300  | -3.29831400 | 1.35630100  |
| O            | 6.98749900  | 0.54262700  | -0.11334600 | C | 0.32316200  | -2.96016800 | 2.68442700  |
| C            | 4.72572700  | 1.19347400  | -0.07639700 | H | -0.65727900 | -2.51289500 | 2.46396600  |
| C            | 3.39427300  | 0.86894000  | -0.06898800 | C | 1.12472400  | -1.91503500 | 3.48079300  |
| H            | 3.07221400  | -0.17420400 | -0.09141000 | H | 2.11636600  | -2.29623600 | 3.77234000  |
| C            | 4.94933500  | 2.66235300  | -0.04049900 | H | 0.59165500  | -1.64512100 | 4.40607100  |
| O            | 3.92453900  | 3.34939300  | -0.01586300 | H | 1.27694800  | -0.99208700 | 2.89796700  |
| C            | 5.46040000  | -1.28754200 | -0.16034500 | C | 0.06558900  | -4.22573200 | 3.52302900  |
| H            | 4.87443700  | -1.58125900 | 0.72515800  | H | 1.00673500  | -4.71985200 | 3.81213600  |
| H            | 4.85435800  | -1.52296400 | -1.04978100 | H | -0.54010000 | -4.96107700 | 2.97078400  |
| H            | 6.38788800  | -1.87290000 | -0.18996500 | H | -0.47273600 | -3.97033800 | 4.44941200  |
| C            | 6.30320600  | 3.29956000  | -0.03261000 | C | 0.31351900  | -3.22609600 | -2.47533100 |
| H            | 6.88796000  | 2.94037800  | 0.82761500  | H | -0.62916500 | -2.68543500 | -2.30386000 |
| H            | 6.87488900  | 2.98945200  | -0.92035200 | C | -0.04673000 | -4.57895200 | -3.11794400 |
| H            | 6.19081400  | 4.39052100  | -0.00148500 | H | -0.58259700 | -4.42430400 | -4.06779000 |
| C            | 2.38056400  | 1.84569700  | -0.03361100 | H | -0.69129900 | -5.18255400 | -2.46001500 |
| C            | 1.20047000  | 2.33851200  | -0.01299100 | H | 0.85463800  | -5.17352900 | -3.33639500 |
| C            | 0.47665200  | 3.59074700  | 0.01198900  | C | 1.15646300  | -2.36341500 | -3.43073200 |
| C            | -0.93742100 | 3.61958700  | 0.00973800  | H | 1.39832800  | -1.38455700 | -2.98649200 |
| C            | 1.18282100  | 4.81943400  | 0.03760300  | H | 0.60635600  | -2.18142600 | -4.36738500 |
| C            | -1.62336200 | 4.83129800  | 0.03178700  | H | 2.10464500  | -2.85499700 | -3.70060500 |
| H            | -1.50123600 | 2.68368400  | -0.01130000 | C | -3.42801100 | 0.02992300  | -0.06468000 |
| C            | 0.48806900  | 6.02516400  | 0.06044200  | C | -3.76962100 | 0.55139600  | -1.33322700 |
| H            | 2.27173600  | 4.80625700  | 0.03882200  | C | -4.55593800 | 1.71278600  | -1.35891800 |
| C            | -0.91269700 | 6.03640900  | 0.05751200  | H | -4.84401400 | 2.14498100  | -2.31961000 |
| H            | -2.71521200 | 4.83441600  | 0.02859100  | C | -4.98641700 | 2.32035400  | -0.17996400 |
| H            | 1.04202800  | 6.96646600  | 0.08042700  | H | -5.60686000 | 3.21887700  | -0.22604200 |
| H            | -1.45084400 | 6.98734600  | 0.07515900  | C | -4.63792700 | 1.77918600  | 1.05690600  |
| N            | -0.96014400 | -2.53772100 | 0.07371600  | H | -4.98807100 | 2.26174800  | 1.97193800  |
| N            | -2.63007600 | -1.17617200 | -0.00402900 | C | -3.85341500 | 0.61977300  | 1.14711900  |
| C            | -1.27167900 | -1.21589800 | 0.01961200  | C | -3.51092500 | 0.04221000  | 2.51824900  |
| C            | -2.10950100 | -3.31599100 | 0.08459400  | H | -2.86412700 | -0.83464200 | 2.36593900  |
| H            | -2.07245900 | -4.40076600 | 0.12597900  | C | -2.71792200 | 1.04153800  | 3.37902700  |
| C            | -3.16345800 | -2.45608000 | 0.03540900  | H | -3.31112400 | 1.93947200  | 3.61399200  |
| H            | -4.23460700 | -2.63595300 | 0.02506500  | H | -1.79836500 | 1.37285200  | 2.87049000  |
| C            | 0.37842200  | -3.08463700 | 0.10347900  | H | -2.42901600 | 0.57906400  | 4.33607600  |
|              |             |             |             | C | -4.77300500 | -0.44986100 | 3.25090300  |

|              |             |             |             |    |             |             |             |
|--------------|-------------|-------------|-------------|----|-------------|-------------|-------------|
| H            | -4.50278500 | -0.91733200 | 4.21103300  | Au | -0.02383100 | 0.37324400  | -0.03778000 |
| H            | -5.32408100 | -1.19401700 | 2.65473700  | N  | 2.50876400  | -1.32493100 | 0.03935400  |
| H            | -5.46468100 | 0.37948300  | 3.46901600  | N  | 0.76065000  | -2.59443000 | 0.15886400  |
| C            | -3.33534100 | -0.09847000 | -2.64465800 | C  | 1.15117300  | -1.29811400 | 0.05270700  |
| H            | -2.71992900 | -0.97741000 | -2.40122400 | C  | 2.96709200  | -2.63001900 | 0.13822700  |
| C            | -4.54559700 | -0.60565700 | -3.45045800 | H  | 4.02688900  | -2.86766200 | 0.14568600  |
| H            | -5.15682800 | -1.30956600 | -2.86423700 | C  | 1.86788100  | -3.42872000 | 0.21320600  |
| H            | -4.20946400 | -1.12546700 | -4.36159800 | H  | 1.77042200  | -4.50698100 | 0.29979400  |
| H            | -5.20077600 | 0.22232600  | -3.76478600 | C  | 3.38105500  | -0.17254800 | -0.06382700 |
| C            | -2.45751100 | 0.84463500  | -3.48648400 | C  | 3.77416800  | 0.26187200  | -1.34981700 |
| H            | -2.10754500 | 0.33285300  | -4.39693200 | C  | 4.64810100  | 1.35710700  | -1.41542900 |
| H            | -1.57173500 | 1.18114900  | -2.92396700 | H  | 4.97834800  | 1.72189800  | -2.39033300 |
| H            | -3.01074800 | 1.74203100  | -3.80579400 | C  | 5.11239300  | 1.98117400  | -0.25816200 |
| Ag           | 0.02455300  | 0.45215000  | -0.00249900 | H  | 5.80210700  | 2.82543900  | -0.33491500 |
| <b>3c-ts</b> |             |             |             | C  | 4.70791500  | 1.52693800  | 0.99657600  |
| C            | -5.69886000 | 0.50458600  | -0.28890700 | H  | 5.08417000  | 2.02360900  | 1.89344500  |
| O            | -6.84049200 | 0.90811200  | -0.18570900 | C  | 3.83352500  | 0.43798900  | 1.12765800  |
| C            | -4.54619200 | 1.45808300  | -0.17541300 | C  | 3.42975100  | -0.04816300 | 2.51732700  |
| C            | -3.25061500 | 1.01579300  | -0.21582800 | H  | 2.68966200  | -0.85311800 | 2.39427100  |
| H            | -3.05605300 | -0.05249600 | -0.33268200 | C  | 2.75087000  | 1.06141700  | 3.33947700  |
| C            | -4.72018300 | 2.93958700  | -0.00816600 | H  | 3.44105100  | 1.89283700  | 3.55242800  |
| O            | -3.69211500 | 3.60400700  | 0.03813100  | H  | 2.40824700  | 0.66420700  | 4.30798200  |
| C            | -5.41768100 | -0.96574100 | -0.53926100 | H  | 1.87724600  | 1.47720000  | 2.81320000  |
| H            | -4.86171000 | -1.11370000 | -1.47874700 | C  | 4.63117400  | -0.64873900 | 3.27100700  |
| H            | -4.82094200 | -1.40910800 | 0.27355400  | H  | 5.41068200  | 0.10725100  | 3.45671800  |
| H            | -6.37956000 | -1.48933400 | -0.60402000 | H  | 5.09555800  | -1.47241600 | 2.70630800  |
| C            | -6.06727900 | 3.59192600  | 0.10004500  | H  | 4.31331100  | -1.04486800 | 4.24841600  |
| H            | -6.67551800 | 3.37276800  | -0.79023200 | C  | 3.30677000  | -0.41179800 | -2.63783300 |
| H            | -6.63208600 | 3.17680900  | 0.94782300  | H  | 2.61782100  | -1.22569700 | -2.36643700 |
| H            | -5.92565900 | 4.67376000  | 0.21737600  | C  | 4.48440200  | -1.05044600 | -3.39745000 |
| C            | -2.10363100 | 1.82840600  | -0.12325900 | H  | 4.12206100  | -1.57975900 | -4.29284300 |
| C            | -0.95246300 | 2.35853900  | -0.08984700 | H  | 5.02681900  | -1.77551500 | -2.77065800 |
| C            | -0.15658600 | 3.56318300  | -0.04551500 | H  | 5.20966500  | -0.29184200 | -3.73188200 |
| C            | 1.25339700  | 3.52595600  | -0.12919300 | C  | 2.52051900  | 0.55857400  | -3.53740400 |
| C            | -0.80985400 | 4.81368700  | 0.07769000  | H  | 1.65596800  | 0.98992000  | -3.00820700 |
| C            | 1.99006800  | 4.70718000  | -0.09242400 | H  | 2.14541100  | 0.03391800  | -4.43034400 |
| H            | 1.76856500  | 2.56886900  | -0.22865800 | H  | 3.14983300  | 1.39243900  | -3.88674000 |
| C            | -0.06077400 | 5.98638200  | 0.11620700  | C  | -0.60437300 | -3.07581000 | 0.20132600  |
| H            | -1.89691000 | 4.84243900  | 0.13997600  | C  | -1.22662400 | -3.43713400 | -1.01536900 |
| C            | 1.33633300  | 5.93841400  | 0.03118300  | C  | -2.53067900 | -3.94792700 | -0.94038100 |
| H            | 3.07905900  | 4.66641500  | -0.16056400 | H  | -3.04237900 | -4.24990200 | -1.85676000 |
| H            | -0.57042600 | 6.94777600  | 0.21220600  | C  | -3.18073900 | -4.09196000 | 0.28527400  |
| H            | 1.91677800  | 6.86382700  | 0.06075200  | H  | -4.19293200 | -4.50246900 | 0.31914500  |
|              |             |             |             | C  | -2.53996700 | -3.72563200 | 1.46811200  |

|           |             |             |             |   |             |             |             |
|-----------|-------------|-------------|-------------|---|-------------|-------------|-------------|
| H         | -3.05923300 | -3.85101500 | 2.42070100  | C | -2.12287600 | 4.44302900  | -0.04011400 |
| C         | -1.23379600 | -3.21286900 | 1.45837000  | H | -1.73824900 | 2.36989900  | -0.46611100 |
| C         | -0.55380700 | -2.84852600 | 2.77584200  | C | -0.23565300 | 5.72449600  | 0.78478800  |
| H         | 0.44974900  | -2.46072400 | 2.54562100  | H | 1.63083200  | 4.68858100  | 0.95876200  |
| C         | -1.30870000 | -1.72861100 | 3.51374500  | C | -1.58716400 | 5.65103500  | 0.42073100  |
| H         | -2.32120500 | -2.04576800 | 3.81016100  | H | -3.17707500 | 4.37552300  | -0.31615900 |
| H         | -1.40681200 | -0.82916900 | 2.88522600  | H | 0.17592700  | 6.66267500  | 1.16410700  |
| H         | -0.77125100 | -1.44313900 | 4.43176400  | H | -2.22436100 | 6.53464700  | 0.50855900  |
| C         | -0.36494900 | -4.08532500 | 3.67345600  | N | -2.42429400 | -1.40146800 | -0.11653900 |
| H         | 0.17850800  | -3.81360800 | 4.59211600  | N | -0.60648300 | -2.51433900 | 0.18747900  |
| H         | 0.20769800  | -4.87458900 | 3.16165900  | C | -1.07777400 | -1.24754900 | 0.02078100  |
| H         | -1.33118900 | -4.51878900 | 3.97654700  | C | -2.78763200 | -2.73740400 | -0.03563200 |
| C         | -0.53035000 | -3.32489900 | -2.36951200 | H | -3.81992000 | -3.06389600 | -0.12395200 |
| H         | 0.43613300  | -2.82272200 | -2.21307300 | C | -1.63869600 | -3.44133800 | 0.15755600  |
| C         | -0.22994600 | -4.71615500 | -2.95880700 | H | -1.46371100 | -4.50686500 | 0.27576800  |
| H         | 0.37887900  | -5.32576800 | -2.27288500 | C | -3.36197800 | -0.32091400 | -0.32648600 |
| H         | 0.32111100  | -4.62179600 | -3.90784400 | C | -4.01418200 | 0.23715700  | 0.79616900  |
| H         | -1.15655900 | -5.27491300 | -3.16594600 | C | -4.93585500 | 1.26759500  | 0.55885300  |
| C         | -1.32790500 | -2.46066100 | -3.36167500 | H | -5.46439900 | 1.71859000  | 1.40134600  |
| H         | -0.76909000 | -2.34597000 | -4.30378400 | C | -5.19414000 | 1.72152900  | -0.73391800 |
| H         | -1.51877600 | -1.45335500 | -2.95864900 | H | -5.92150900 | 2.52110000  | -0.89550000 |
| H         | -2.29961800 | -2.91481300 | -3.61272600 | C | -4.53599900 | 1.15099600  | -1.82291000 |
|           |             |             |             | H | -4.75318200 | 1.51296300  | -2.83003300 |
|           |             |             |             | C | -3.61104700 | 0.11081300  | -1.64899800 |
|           |             |             |             | C | -2.91084400 | -0.49464700 | -2.86330500 |
|           |             |             |             | H | -2.33914200 | -1.37037900 | -2.52132700 |
|           |             |             |             | C | -1.90135200 | 0.49610700  | -3.47178800 |
|           |             |             |             | H | -2.40270500 | 1.40283300  | -3.84704600 |
|           |             |             |             | H | -1.36613300 | 0.03575000  | -4.31762500 |
|           |             |             |             | H | -1.15316100 | 0.81007700  | -2.72615700 |
|           |             |             |             | C | -3.91112600 | -0.99712800 | -3.91917700 |
|           |             |             |             | H | -4.49207400 | -0.17247800 | -4.36149400 |
|           |             |             |             | H | -4.62543000 | -1.71669500 | -3.48967500 |
|           |             |             |             | H | -3.37743500 | -1.49862100 | -4.74187800 |
|           |             |             |             | C | -3.77078400 | -0.25144900 | 2.22179000  |
|           |             |             |             | H | -2.93869900 | -0.97078500 | 2.19421900  |
|           |             |             |             | C | -5.00123300 | -0.99713600 | 2.77220600  |
|           |             |             |             | H | -4.79504300 | -1.39151800 | 3.77994000  |
|           |             |             |             | H | -5.28585700 | -1.84464500 | 2.12902700  |
|           |             |             |             | H | -5.87502800 | -0.33019500 | 2.84764900  |
|           |             |             |             | C | -3.34411800 | 0.88916600  | 3.16211500  |
|           |             |             |             | H | -2.45485500 | 1.41554600  | 2.78169000  |
|           |             |             |             | H | -3.10288700 | 0.49011500  | 4.16008600  |
|           |             |             |             | H | -4.14437900 | 1.63460700  | 3.29427600  |
| <b>4a</b> |             |             |             |   |             |             |             |
| C         | 5.74419700  | 0.84315800  | -0.33150200 |   |             |             |             |
| O         | 6.77293800  | 1.48356500  | -0.42423700 |   |             |             |             |
| C         | 4.43770200  | 1.55403400  | -0.22699400 |   |             |             |             |
| C         | 3.13270600  | 1.04755600  | -0.11298400 |   |             |             |             |
| H         | 2.82966200  | 0.00275800  | -0.07203600 |   |             |             |             |
| C         | 4.29974100  | 2.95573300  | -0.24720500 |   |             |             |             |
| O         | 3.02286100  | 3.29204700  | -0.13783900 |   |             |             |             |
| C         | 5.72554400  | -0.66724700 | -0.32045400 |   |             |             |             |
| H         | 5.24654800  | -1.04723200 | 0.59636600  |   |             |             |             |
| H         | 5.14156000  | -1.05262600 | -1.17241400 |   |             |             |             |
| H         | 6.75541400  | -1.04057100 | -0.38270600 |   |             |             |             |
| C         | 5.30227600  | 4.03672200  | -0.37381500 |   |             |             |             |
| H         | 6.00747600  | 3.99806300  | 0.47205700  |   |             |             |             |
| H         | 5.91699400  | 3.87961700  | -1.27340700 |   |             |             |             |
| H         | 4.81067100  | 5.01734400  | -0.41147000 |   |             |             |             |
| C         | 2.23903900  | 2.12980700  | -0.04821800 |   |             |             |             |
| C         | 0.84484300  | 2.14370800  | 0.05443600  |   |             |             |             |
| C         | 0.07212400  | 3.36828300  | 0.19559600  |   |             |             |             |
| C         | -1.31152600 | 3.31652300  | -0.12680000 |   |             |             |             |
| C         | 0.58680400  | 4.60992100  | 0.66405600  |   |             |             |             |

|           |             |             |             |   |             |             |             |
|-----------|-------------|-------------|-------------|---|-------------|-------------|-------------|
| C         | 0.78308700  | -2.87093200 | 0.36331400  | H | 6.75546500  | 2.99416600  | 0.47748100  |
| C         | 1.31999300  | -2.88353200 | 1.67077400  | H | 6.64706000  | 2.94704500  | -1.27016600 |
| C         | 2.66148600  | -3.26877800 | 1.81272300  | H | 5.77430700  | 4.24756200  | -0.37063900 |
| H         | 3.11036400  | -3.29410000 | 2.80791300  | C | 2.70458100  | 1.88085300  | -0.07121200 |
| C         | 3.42785900  | -3.63568900 | 0.70698300  | C | 1.33897100  | 2.14996500  | 0.03334400  |
| H         | 4.46587200  | -3.94898300 | 0.84383800  | C | 0.79597900  | 3.48943100  | 0.18256300  |
| C         | 2.87060900  | -3.61635700 | -0.57116500 | C | -0.57307900 | 3.69702600  | -0.14162200 |
| H         | 3.48089200  | -3.91512700 | -1.42631200 | C | 1.52972900  | 4.61279600  | 0.66010700  |
| C         | 1.53563900  | -3.23593300 | -0.77594600 | C | -1.16216600 | 4.95334200  | -0.04765100 |
| C         | 0.95503900  | -3.24111100 | -2.18827700 | H | -1.16620800 | 2.84869300  | -0.49056900 |
| H         | -0.09060000 | -2.90574400 | -2.12620900 | C | 0.92700800  | 5.85898300  | 0.78867000  |
| C         | 1.68858900  | -2.24833300 | -3.10788200 | H | 2.56963000  | 4.49557600  | 0.95626500  |
| H         | 2.74559800  | -2.52638000 | -3.24847400 | C | -0.41405400 | 6.03863700  | 0.42288200  |
| H         | 1.65769000  | -1.22487900 | -2.70109700 | H | -2.20995100 | 5.08482400  | -0.32575900 |
| H         | 1.21979900  | -2.22883800 | -4.10450100 | H | 1.50393300  | 6.70216500  | 1.17538700  |
| C         | 0.94210700  | -4.65785500 | -2.79056900 | H | -0.87767900 | 7.02392400  | 0.51646900  |
| H         | 0.46286000  | -4.64941800 | -3.78228800 | N | -2.69392700 | -1.09006900 | -0.11437900 |
| H         | 0.38828400  | -5.36424400 | -2.15271500 | N | -1.07253400 | -2.47552600 | 0.18692200  |
| H         | 1.96161200  | -5.05501200 | -2.91894700 | C | -1.34158300 | -1.15211200 | 0.02020700  |
| C         | 0.50990300  | -2.47534300 | 2.89833800  | C | -3.26229700 | -2.35329500 | -0.03354300 |
| H         | -0.54259600 | -2.38210600 | 2.59163200  | H | -4.33354300 | -2.51193000 | -0.11778100 |
| C         | 0.55882600  | -3.53119100 | 4.01573500  | C | -2.23822600 | -3.22904000 | 0.15767500  |
| H         | 0.23624000  | -4.51974800 | 3.65368400  | H | -2.23278700 | -4.30884100 | 0.27554100  |
| H         | -0.10677400 | -3.23931000 | 4.84323300  | C | -3.45289700 | 0.12570500  | -0.31249800 |
| H         | 1.57082900  | -3.64175500 | 4.43633200  | C | -3.95076400 | 0.80442700  | 0.82254300  |
| C         | 0.95680600  | -1.09321200 | 3.41012200  | C | -4.69126300 | 1.97456800  | 0.59894200  |
| H         | 0.33232500  | -0.77048500 | 4.25835100  | H | -5.09556100 | 2.52438000  | 1.45168800  |
| H         | 0.87520900  | -0.33188400 | 2.61739800  | C | -4.92771100 | 2.44424700  | -0.69234900 |
| H         | 2.00411100  | -1.11227300 | 3.75307200  | H | -5.51389300 | 3.35438100  | -0.84226800 |
| Cu        | -0.08855600 | 0.43262500  | 0.01457500  | C | -4.42882300 | 1.74971300  | -1.79365000 |
|           |             |             |             | H | -4.62886000 | 2.12447100  | -2.79986000 |
| <b>4b</b> |             |             |             | C | -3.68326300 | 0.57229900  | -1.63307700 |
| C         | 5.90489900  | -0.03268800 | -0.41865200 | C | -3.17749400 | -0.17666400 | -2.86377600 |
| O         | 7.03696600  | 0.40164700  | -0.49773300 | H | -2.58683500 | -1.03762700 | -2.51756600 |
| C         | 4.75818000  | 0.91114600  | -0.28390800 | C | -2.24184900 | 0.69502000  | -3.71983100 |
| C         | 3.38393000  | 0.65385500  | -0.17210900 | H | -2.76612900 | 1.56936100  | -4.13719000 |
| H         | 2.89218200  | -0.31707000 | -0.16041000 | H | -1.84476200 | 0.11442100  | -4.56757500 |
| C         | 4.88375100  | 2.31487600  | -0.26407300 | H | -1.38743000 | 1.06535800  | -3.13102300 |
| O         | 3.69296000  | 2.88024100  | -0.13782800 | C | -4.34479500 | -0.73447900 | -3.69903900 |
| C         | 5.59562400  | -1.51131500 | -0.45362500 | H | -4.97633300 | 0.07309100  | -4.10223300 |
| H         | 5.06881300  | -1.82319000 | 0.46304900  | H | -4.99170200 | -1.39509300 | -3.10075100 |
| H         | 4.93464500  | -1.74907700 | -1.30336900 | H | -3.96353800 | -1.31592800 | -4.55349900 |
| H         | 6.53318200  | -2.07311600 | -0.54944600 | C | -3.73087900 | 0.30872000  | 2.24967800  |
| C         | 6.07159700  | 3.19107600  | -0.36391900 | H | -3.09615000 | -0.58861000 | 2.20301800  |

|           |             |             |             |   |             |             |             |
|-----------|-------------|-------------|-------------|---|-------------|-------------|-------------|
| C         | -5.05869600 | -0.10932500 | 2.90849300  | H | 2.89839500  | -0.31775700 | -0.14919000 |
| H         | -4.87739600 | -0.51782100 | 3.91535600  | C | 4.75162500  | 2.41305800  | -0.30044800 |
| H         | -5.57924200 | -0.87990000 | 2.31845200  | O | 3.53209100  | 2.91592800  | -0.16986300 |
| H         | -5.74398800 | 0.74655400  | 3.01584700  | C | 5.66244300  | -1.37214300 | -0.44476500 |
| C         | -2.98235500 | 1.34415500  | 3.10744000  | H | 5.15123900  | -1.69736000 | 0.47605900  |
| H         | -2.01684200 | 1.62028000  | 2.65472200  | H | 5.01599100  | -1.65651000 | -1.29138700 |
| H         | -2.78358100 | 0.93827800  | 4.11208700  | H | 6.62820900  | -1.88541400 | -0.53205900 |
| H         | -3.56840600 | 2.26793000  | 3.23664500  | C | 5.88811400  | 3.35202900  | -0.42133200 |
| C         | 0.24460700  | -3.04232900 | 0.37215400  | H | 6.56551900  | 3.23484700  | 0.44054100  |
| C         | 0.75824900  | -3.14982200 | 1.68393400  | H | 6.49421000  | 3.10203200  | -1.30514900 |
| C         | 2.02616100  | -3.73200400 | 1.83331700  | H | 5.52963800  | 4.38787800  | -0.47804500 |
| H         | 2.45315900  | -3.83760500 | 2.83303800  | C | 2.60458500  | 1.86954100  | -0.08264200 |
| C         | 2.74382300  | -4.19363700 | 0.73069400  | C | 1.22573700  | 2.08728000  | 0.02864800  |
| H         | 3.72249900  | -4.65871500 | 0.87363600  | C | 0.65266200  | 3.41799800  | 0.18381800  |
| C         | 2.20991100  | -4.07719500 | -0.55266800 | C | -0.69273000 | 3.63073800  | -0.22144800 |
| H         | 2.77843500  | -4.45317700 | -1.40625100 | C | 1.34840900  | 4.52013900  | 0.75369700  |
| C         | 0.94907300  | -3.49971800 | -0.76484400 | C | -1.29080800 | 4.88201700  | -0.11689000 |
| C         | 0.38222800  | -3.41256500 | -2.17968400 | H | -1.25594600 | 2.79558600  | -0.64178500 |
| H         | -0.56124500 | -2.84918900 | -2.13108300 | C | 0.73177000  | 5.75869900  | 0.89362900  |
| C         | 1.31402900  | -2.64054500 | -3.13013200 | H | 2.36520300  | 4.39200600  | 1.11851600  |
| H         | 2.27546300  | -3.15909800 | -3.27334600 | C | -0.58195800 | 5.94980100  | 0.44590200  |
| H         | 1.52742200  | -1.62814700 | -2.75153100 | H | -2.31819600 | 5.02265100  | -0.45930600 |
| H         | 0.84838400  | -2.53749500 | -4.12298400 | H | 1.27688500  | 6.58549900  | 1.35462100  |
| C         | 0.05135100  | -4.80995800 | -2.73640300 | H | -1.05632400 | 6.92908100  | 0.54771600  |
| H         | -0.40722400 | -4.72900000 | -3.73469500 | N | -2.63955700 | -1.18064100 | -0.10373100 |
| H         | -0.65183200 | -5.35075300 | -2.08392600 | N | -0.97261400 | -2.51953700 | 0.19825900  |
| H         | 0.95663400  | -5.43029100 | -2.83495300 | C | -1.28583600 | -1.20646000 | 0.02867900  |
| C         | -0.00644200 | -2.67648400 | 2.91748900  | C | -3.16667700 | -2.46017600 | -0.01753500 |
| H         | -0.97256800 | -2.27117900 | 2.58282200  | H | -4.23276200 | -2.65108000 | -0.09934300 |
| C         | -0.31339500 | -3.84162400 | 3.87596700  | C | -2.11626100 | -3.30457200 | 0.17396800  |
| H         | -0.87364900 | -4.64423500 | 3.37138700  | H | -2.07795500 | -4.38329400 | 0.29487800  |
| H         | -0.91807600 | -3.48888000 | 4.72639500  | C | -3.43889000 | 0.00917500  | -0.30897500 |
| H         | 0.60726400  | -4.28557200 | 4.28709300  | C | -3.95278800 | 0.68050900  | 0.82279700  |
| C         | 0.73268400  | -1.53564200 | 3.63971900  | C | -4.73835500 | 1.81927600  | 0.59185200  |
| H         | 0.13807200  | -1.17251400 | 4.49292700  | H | -5.15732200 | 2.36277500  | 1.44145100  |
| H         | 0.91251500  | -0.68313900 | 2.96484800  | C | -5.00082000 | 2.26553100  | -0.70261600 |
| H         | 1.70698400  | -1.86639400 | 4.03394000  | H | -5.62164100 | 3.15144700  | -0.85796200 |
| Ag        | 0.01274800  | 0.47580400  | 0.00536500  | C | -4.48308600 | 1.57890600  | -1.80015600 |
| <b>4c</b> |             |             |             | H | -4.70372400 | 1.93522000  | -2.80875100 |
| C         | 5.89352000  | 0.12082700  | -0.43186900 | C | -3.69304800 | 0.43183900  | -1.63275300 |
| O         | 7.00036400  | 0.61335000  | -0.52444400 | C | -3.16599600 | -0.30888500 | -2.85953800 |
| C         | 4.69920000  | 1.00514300  | -0.30137300 | H | -2.54810600 | -1.14921500 | -2.51003300 |
| C         | 3.34089800  | 0.67611600  | -0.17550500 | C | -2.25781100 | 0.58631500  | -3.72095400 |
|           |             |             |             | H | -2.80928900 | 1.44191400  | -4.14214300 |

|   |             |             |             |          |             |             |             |
|---|-------------|-------------|-------------|----------|-------------|-------------|-------------|
| H | -1.84453800 | 0.01339300  | -4.56622300 | H        | 1.80584600  | -1.87564100 | 4.05038900  |
| H | -1.41447000 | 0.98350900  | -3.13410700 | Au       | -0.01061400 | 0.42335600  | 0.00645100  |
| C | -4.31621700 | -0.90742100 | -3.69029200 |          |             |             |             |
| H | -4.97293700 | -0.12222100 | -4.09737100 | <b>5</b> |             |             |             |
| H | -4.94207300 | -1.58447000 | -3.08791700 | Pd       | 0.00019500  | -0.02443600 | 0.03382600  |
| H | -3.91772800 | -1.48134100 | -4.54196800 | P        | -2.31592300 | -0.00955100 | 0.01311900  |
| C | -3.70390800 | 0.20924000  | 2.25329800  | P        | 2.31666800  | -0.00998000 | 0.01160100  |
| H | -3.02912000 | -0.65872100 | 2.21244600  | C        | -3.09511100 | 1.61694300  | 0.44389100  |
| C | -5.00878700 | -0.26166900 | 2.92225700  | C        | -2.47251300 | 2.39054800  | 1.43999800  |
| H | -4.80583500 | -0.64779800 | 3.93380600  | C        | -4.25366200 | 2.11488000  | -0.17464700 |
| H | -5.49489600 | -1.06345800 | 2.34441700  | C        | -3.00755900 | 3.62251600  | 1.82282600  |
| H | -5.73294800 | 0.56281600  | 3.02034300  | H        | -1.55353900 | 2.02296000  | 1.90572500  |
| C | -2.99812100 | 1.28547300  | 3.09680100  | C        | -4.78208600 | 3.35446300  | 0.20239400  |
| H | -2.05254400 | 1.60471500  | 2.63116700  | H        | -4.74620600 | 1.53818600  | -0.96052200 |
| H | -2.76934600 | 0.89532500  | 4.10132700  | C        | -4.16394400 | 4.10874400  | 1.20331400  |
| H | -3.62807900 | 2.17961000  | 3.22799900  | H        | -2.51279400 | 4.21070600  | 2.60022300  |
| C | 0.36067700  | -3.05178100 | 0.37756700  | H        | -5.68153400 | 3.73154100  | -0.29179700 |
| C | 0.87886500  | -3.15322000 | 1.68761800  | H        | -4.57770400 | 5.07763100  | 1.49523800  |
| C | 2.15966000  | -3.70805400 | 1.83072200  | C        | -3.08859200 | -0.42590400 | -1.61995600 |
| H | 2.59141400  | -3.80929600 | 2.82882400  | C        | -4.26651800 | -1.17835600 | -1.75574000 |
| C | 2.88457000  | -4.14767900 | 0.72385400  | C        | -2.44252800 | 0.03822000  | -2.77993100 |
| H | 3.87382100  | -4.59131100 | 0.86204500  | C        | -4.79081200 | -1.45228300 | -3.02385200 |
| C | 2.34510100  | -4.03689700 | -0.55772400 | H        | -4.77787100 | -1.55842600 | -0.86881400 |
| H | 2.91956400  | -4.39594400 | -1.41455100 | C        | -2.97351700 | -0.22616400 | -4.04429900 |
| C | 1.07084600  | -3.48747500 | -0.76399300 | H        | -1.50917700 | 0.60040400  | -2.68260700 |
| C | 0.49711400  | -3.40848500 | -2.17652800 | C        | -4.14916100 | -0.97433200 | -4.16959100 |
| H | -0.45760400 | -2.86451300 | -2.12358100 | H        | -5.70589500 | -2.04369900 | -3.11439200 |
| C | 1.40904000  | -2.61553400 | -3.12891200 | H        | -2.46082700 | 0.14396000  | -4.93608300 |
| H | 2.38016500  | -3.11430400 | -3.27717900 | H        | -4.55990000 | -1.19048500 | -5.15936200 |
| H | 1.60197600  | -1.59982200 | -2.74899400 | C        | -3.13680400 | -1.19339600 | 1.18047200  |
| H | 0.93708600  | -2.52060900 | -4.11959400 | C        | -4.30365500 | -0.89440700 | 1.90218400  |
| C | 0.19293000  | -4.81147100 | -2.73458400 | C        | -2.53739400 | -2.45417600 | 1.35264800  |
| H | -0.27047500 | -4.73813600 | -3.73122700 | C        | -4.86295000 | -1.83930100 | 2.76966800  |
| H | -0.49671400 | -5.36820100 | -2.08095100 | H        | -4.77903500 | 0.08272500  | 1.79383800  |
| H | 1.11051900  | -5.41276400 | -2.83733500 | C        | -3.10348500 | -3.40036500 | 2.20975400  |
| C | 0.10675800  | -2.70289600 | 2.92504000  | H        | -1.61227900 | -2.68428900 | 0.81614600  |
| H | -0.86571200 | -2.30965500 | 2.59402200  | C        | -4.26792400 | -3.09431400 | 2.92259400  |
| C | -0.18151500 | -3.88191100 | 3.87241800  | H        | -5.76878000 | -1.59015900 | 3.32895100  |
| H | -0.72784300 | -4.68944600 | 3.36036300  | H        | -2.62669000 | -4.37666900 | 2.33056200  |
| H | -0.79233300 | -3.54731000 | 4.72576200  | H        | -4.70595700 | -3.83059200 | 3.60165100  |
| H | 0.74648100  | -4.31396800 | 4.27972800  | C        | 3.07520900  | 1.35042500  | -0.99414800 |
| C | 0.82729700  | -1.55658500 | 3.65701000  | C        | 4.22636800  | 1.18957900  | -1.78214100 |
| H | 0.22573300  | -1.20976300 | 4.51218500  | C        | 2.44305100  | 2.60668600  | -0.96518500 |
| H | 0.99335400  | -0.69709200 | 2.98816700  | C        | 4.73823200  | 2.26439800  | -2.51770300 |

|          |             |             |             |    |             |             |             |
|----------|-------------|-------------|-------------|----|-------------|-------------|-------------|
| H        | 4.72633700  | 0.21986200  | -1.82829100 | H  | -3.67028800 | 3.91184400  | 2.87848700  |
| C        | 2.96179400  | 3.68125700  | -1.69073700 | H  | -2.05566000 | 4.55850600  | 3.37256800  |
| H        | 1.52898900  | 2.73135100  | -0.37733100 | C  | -0.71778300 | 2.27797600  | -0.87991200 |
| C        | 4.11080200  | 3.51213100  | -2.47107200 | C  | 0.55150300  | 2.25673800  | -1.04374900 |
| H        | 5.63227300  | 2.12280200  | -3.13086200 | C  | 1.71268100  | 3.11564000  | -1.21656300 |
| H        | 2.45969800  | 4.65170500  | -1.65626000 | C  | 2.67996600  | 2.87163300  | -2.21062700 |
| H        | 4.51141000  | 4.35002500  | -3.04769300 | C  | 1.86815000  | 4.24530000  | -0.38313700 |
| C        | 3.11389500  | -1.53804400 | -0.67254900 | C  | 3.76163200  | 3.73822600  | -2.37638500 |
| C        | 4.32044800  | -2.06995900 | -0.18914700 | H  | 2.57091200  | 1.99859500  | -2.85591600 |
| C        | 2.45809300  | -2.19454300 | -1.72928700 | C  | 2.95759000  | 5.10108100  | -0.54678000 |
| C        | 4.86337600  | -3.22733800 | -0.75768400 | H  | 1.12241700  | 4.43205000  | 0.39222500  |
| H        | 4.83977500  | -1.58303700 | 0.63905800  | C  | 3.90669300  | 4.85376300  | -1.54511800 |
| C        | 3.00698000  | -3.34374600 | -2.30300500 | H  | 4.49884100  | 3.53758500  | -3.15807600 |
| H        | 1.50255400  | -1.80272100 | -2.09001500 | H  | 3.06502200  | 5.97081000  | 0.10711700  |
| C        | 4.21123900  | -3.86409900 | -1.81715100 | H  | 4.75703300  | 5.52860400  | -1.67436900 |
| H        | 5.80090000  | -3.63292300 | -0.36797100 | Pd | 0.04073600  | 0.27093900  | -0.60438500 |
| H        | 2.48583900  | -3.84152500 | -3.12501300 | P  | 2.12271800  | -0.59881900 | 0.17758000  |
| H        | 4.63645500  | -4.76918900 | -2.25882100 | P  | -1.73619900 | -1.33718400 | -0.33367200 |
| C        | 3.13213800  | 0.18316400  | 1.66520200  | C  | 3.53019600  | -0.39771200 | -1.00716200 |
| C        | 4.28751400  | 0.95200000  | 1.88055800  | C  | 3.31196600  | -0.81020100 | -2.33504500 |
| C        | 2.54110700  | -0.47404900 | 2.75937500  | C  | 4.77537300  | 0.15250100  | -0.66806100 |
| C        | 4.84408100  | 1.05270200  | 3.16050700  | C  | 4.32428000  | -0.70556700 | -3.29129700 |
| H        | 4.75590300  | 1.48197700  | 1.04840200  | H  | 2.33366200  | -1.20537500 | -2.62411000 |
| C        | 3.10416300  | -0.38133400 | 4.03399900  | C  | 5.78393800  | 0.27119900  | -1.63073100 |
| H        | 1.62468100  | -1.05122300 | 2.60528500  | H  | 4.96228100  | 0.50335700  | 0.34790600  |
| C        | 4.25734200  | 0.38433200  | 4.23824000  | C  | 5.56565600  | -0.16287100 | -2.94044600 |
| H        | 5.74094600  | 1.65890400  | 3.31375700  | H  | 4.13922800  | -1.03694200 | -4.31644000 |
| H        | 2.63374700  | -0.89964900 | 4.87374600  | H  | 6.74553200  | 0.70970900  | -1.35164500 |
| H        | 4.69284400  | 0.46562200  | 5.23765800  | H  | 6.35668900  | -0.07145900 | -3.68930600 |
| <b>6</b> |             |             |             | C  | 2.62268200  | 0.27460000  | 1.73361700  |
| C        | -4.13351100 | 3.83624600  | -0.12220900 | C  | 3.67644000  | -0.19511000 | 2.54144900  |
| O        | -4.85090200 | 4.28691900  | 0.75926700  | C  | 1.89985700  | 1.40418300  | 2.14939200  |
| C        | -2.73071300 | 3.40606800  | 0.13400400  | C  | 4.01130100  | 0.46695500  | 3.72439800  |
| C        | -2.03860200 | 2.74408400  | -0.86940600 | H  | 4.23157200  | -1.09089400 | 2.25317700  |
| H        | -2.59224200 | 2.51744800  | -1.78663300 | C  | 2.23276900  | 2.06001300  | 3.33979200  |
| C        | -2.06415300 | 3.65735300  | 1.44742800  | H  | 1.05851000  | 1.77402000  | 1.56078700  |
| O        | -0.93150100 | 3.23241300  | 1.65869800  | C  | 3.28982700  | 1.59769300  | 4.12587600  |
| C        | -4.69369500 | 3.73757700  | -1.53874700 | H  | 4.83303400  | 0.09249100  | 4.34068600  |
| H        | -4.06166000 | 4.26793500  | -2.26800500 | H  | 1.64564600  | 2.92982700  | 3.64379800  |
| H        | -4.77869500 | 2.68992400  | -1.86624200 | H  | 3.54865400  | 2.10910800  | 5.05695700  |
| H        | -5.69553300 | 4.18569600  | -1.52999700 | C  | 2.30240600  | -2.36998600 | 0.71305200  |
| C        | -2.76469600 | 4.43655300  | 2.54231800  | C  | 3.19664400  | -3.27783400 | 0.12369700  |
| H        | -3.11366500 | 5.41504300  | 2.18153000  | C  | 1.46313700  | -2.82482400 | 1.74765100  |
|          |             |             |             | C  | 3.24807800  | -4.60834700 | 0.55755500  |



|          |             |             |             |                        |             |             |             |
|----------|-------------|-------------|-------------|------------------------|-------------|-------------|-------------|
| H        | 3.86451000  | -2.95146800 | -0.67529100 | C                      | -1.15176000 | -1.23760300 | 0.00001900  |
| C        | 1.52072400  | -4.14945800 | 2.18224600  | C                      | -1.83254300 | -0.00001200 | 0.00014400  |
| H        | 0.75990100  | -2.13619400 | 2.22221600  | C                      | -1.15172500 | 1.23760800  | 0.00023200  |
| C        | 2.41251200  | -5.04839800 | 1.58619100  | C                      | 0.24753200  | 1.21672600  | 0.00022500  |
| H        | 3.95326500  | -5.30034300 | 0.08921600  | H                      | 0.80252100  | -2.15630500 | -0.00025000 |
| H        | 0.86077000  | -4.48086600 | 2.98785300  | H                      | 0.80258400  | 2.15623200  | 0.00033700  |
| H        | 2.45528800  | -6.08701200 | 1.92407000  | Br                     | 2.83694300  | 0.00000600  | -0.00004300 |
| C        | -3.38055000 | -0.77136900 | -0.98519600 | C                      | -1.91630900 | 2.53433200  | -0.00015000 |
| C        | -4.51239400 | -0.57884900 | -0.17927600 | H                      | -2.57359700 | 2.60941900  | 0.88152900  |
| C        | -3.48288300 | -0.51958900 | -2.36661000 | H                      | -1.23485400 | 3.39601200  | 0.00202900  |
| C        | -5.72406100 | -0.15994300 | -0.74387600 | H                      | -2.56959900 | 2.61098400  | -0.88473200 |
| H        | -4.45823500 | -0.76098500 | 0.89557000  | C                      | -1.91633600 | -2.53433600 | -0.00005300 |
| C        | -4.69390800 | -0.11523100 | -2.92979400 | H                      | -1.23488300 | -3.39601500 | -0.00164100 |
| H        | -2.60763800 | -0.64973600 | -3.00957700 | H                      | -2.57031800 | -2.61096200 | 0.88402500  |
| C        | -5.82166800 | 0.06459800  | -2.11839400 | H                      | -2.57295600 | -2.60943700 | -0.88222800 |
| H        | -6.59553700 | -0.01311700 | -0.10073400 | N                      | -3.21689200 | 0.00001700  | 0.00000000  |
| H        | -4.75842700 | 0.06307400  | -4.00647200 | C                      | -4.39563900 | 0.00004100  | -0.00008800 |
| H        | -6.77004000 | 0.38397700  | -2.55775500 |                        |             |             |             |
| C        | -2.08858300 | -1.68433400 | 1.45153000  | <b>PPh<sub>3</sub></b> |             |             |             |
| C        | -2.52383800 | -2.92779100 | 1.93802800  | P                      | -0.00134000 | -0.00029700 | 1.20994900  |
| C        | -1.88398500 | -0.63145200 | 2.36335500  | C                      | -1.63411900 | -0.35259100 | 0.40274500  |
| C        | -2.75639200 | -3.11240200 | 3.30506700  | C                      | -2.44324600 | -1.33264300 | 1.00727000  |
| H        | -2.67581200 | -3.76315300 | 1.25243000  | C                      | -2.12261800 | 0.31356000  | -0.73385300 |
| C        | -2.12706600 | -0.81626000 | 3.72724400  | C                      | -3.69430800 | -1.65583500 | 0.47718300  |
| H        | -1.51922500 | 0.33601200  | 2.00641900  | H                      | -2.08765000 | -1.84593100 | 1.90571100  |
| C        | -2.56205400 | -2.05781400 | 4.20197600  | C                      | -3.38109400 | -0.00153300 | -1.25761300 |
| H        | -3.09074700 | -4.08761700 | 3.66901800  | H                      | -1.51728000 | 1.08498700  | -1.21483700 |
| H        | -1.96400400 | 0.01270700  | 4.42038400  | C                      | -4.16815000 | -0.98815100 | -0.65714700 |
| H        | -2.74401800 | -2.20455600 | 5.26981700  | H                      | -4.30622900 | -2.42385900 | 0.95769800  |
| C        | -1.62778700 | -3.01017400 | -1.13109800 | H                      | -3.74658000 | 0.52773100  | -2.14185100 |
| C        | -2.76742200 | -3.78646600 | -1.41344400 | H                      | -5.15120400 | -1.23270900 | -1.06788300 |
| C        | -0.36635500 | -3.51434600 | -1.48426200 | C                      | 0.50974500  | 1.59012000  | 0.40232400  |
| C        | -2.64263400 | -5.03921100 | -2.01926300 | C                      | 1.35144700  | 1.68182500  | -0.71872000 |
| H        | -3.76193900 | -3.40772700 | -1.16805800 | C                      | 0.04579400  | 2.78001500  | 0.99396600  |
| C        | -0.24172300 | -4.76877800 | -2.08975300 | C                      | 1.71090200  | 2.92996100  | -1.23871800 |
| H        | 0.52554900  | -2.92071700 | -1.28196700 | H                      | 1.73093900  | 0.77279600  | -1.19024600 |
| C        | -1.37891700 | -5.53425600 | -2.35810300 | C                      | 0.39443300  | 4.02564500  | 0.46725500  |
| H        | -3.53813800 | -5.62901000 | -2.23219600 | H                      | -0.59374600 | 2.72752400  | 1.88026800  |
| H        | 0.75015500  | -5.14445800 | -2.35296000 | C                      | 1.23144100  | 4.10380900  | -0.65097600 |
| H        | -1.28316100 | -6.51293400 | -2.83565300 | H                      | 2.36839400  | 2.98328000  | -2.11068700 |
|          |             |             |             | H                      | 0.02039800  | 4.93885200  | 0.93778100  |
| <b>7</b> |             |             |             | H                      | 1.51335100  | 5.07789700  | -1.05909700 |
| C        | 0.93196900  | -0.00003800 | 0.00011300  | C                      | 1.12108500  | -1.23775700 | 0.40297600  |
| C        | 0.24753800  | -1.21675900 | -0.00003900 | C                      | 2.37819800  | -1.43971700 | 1.00315100  |

|          |             |             |             |   |             |             |             |
|----------|-------------|-------------|-------------|---|-------------|-------------|-------------|
| C        | 0.78681500  | -2.00248400 | -0.72725700 | C | -4.99941500 | -3.15752500 | -1.75219300 |
| C        | 3.28471000  | -2.36209800 | 0.47593100  | H | -4.16945300 | -3.15571700 | 0.23799700  |
| H        | 2.64675200  | -0.86848500 | 1.89686700  | C | -3.66443300 | -2.10366600 | -3.47140000 |
| C        | 1.69006300  | -2.93561600 | -1.24785100 | H | -1.79525600 | -1.23761900 | -2.81980100 |
| H        | -0.18618000 | -1.87119300 | -1.20558900 | C | -4.82460400 | -2.78559100 | -3.08817300 |
| C        | 2.94111400  | -3.11571400 | -0.65139400 | H | -5.90713600 | -3.68264800 | -1.44378300 |
| H        | 4.25823800  | -2.50152800 | 0.95347500  | H | -3.52307900 | -1.80226400 | -4.51257900 |
| H        | 1.41264200  | -3.52415300 | -2.12657800 | H | -5.59367100 | -3.02026400 | -3.82853400 |
| H        | 3.64499100  | -3.84553200 | -1.05989800 | C | -2.24643200 | -1.90815600 | 1.68507500  |
|          |             |             |             | C | -2.42243100 | -3.15876500 | 2.30541800  |
| <b>8</b> |             |             |             | C | -2.64241900 | -0.74490000 | 2.36718000  |
| C        | -5.96917100 | 1.63164900  | -0.36473200 | C | -2.99726100 | -3.24247300 | 3.57622800  |
| O        | -6.93883400 | 1.84573100  | 0.34675700  | H | -2.10166000 | -4.07225100 | 1.79912000  |
| C        | -4.58648400 | 1.99282400  | 0.05931200  | C | -3.21925600 | -0.83408700 | 3.63811200  |
| C        | -3.52506100 | 1.70311300  | -0.77119100 | H | -2.49595400 | 0.24033500  | 1.91667100  |
| H        | -3.76207100 | 1.20830300  | -1.71923000 | C | -3.39865000 | -2.08023200 | 4.24409500  |
| C        | -4.32581200 | 2.65488000  | 1.37961200  | H | -3.12772000 | -4.21974200 | 4.04861600  |
| O        | -3.20255800 | 2.62459300  | 1.86389400  | H | -3.51838800 | 0.08243700  | 4.15238100  |
| C        | -6.18621000 | 0.96591500  | -1.72080600 | H | -3.84421700 | -2.14789600 | 5.24010100  |
| H        | -5.82583400 | 1.59772400  | -2.54795700 | C | -0.34774100 | -3.17226900 | -0.08504900 |
| H        | -5.66483800 | -0.00177100 | -1.78836600 | C | -0.51033100 | -4.23533500 | -0.98662100 |
| H        | -7.26458500 | 0.80023400  | -1.83901400 | C | 0.76951600  | -3.17687100 | 0.77113700  |
| C        | -5.43286900 | 3.38600900  | 2.11003900  | C | 0.42021000  | -5.28072300 | -1.02887400 |
| H        | -5.99940500 | 4.04715400  | 1.43779700  | H | -1.36817100 | -4.25495600 | -1.66121300 |
| H        | -6.16555400 | 2.66690500  | 2.50388700  | C | 1.68923600  | -4.22644700 | 0.73680500  |
| H        | -4.97740700 | 3.95747100  | 2.93039000  | H | 0.91704800  | -2.35338200 | 1.47491500  |
| C        | -2.14191300 | 1.91908600  | -0.60055600 | C | 1.51896800  | -5.28215700 | -0.16729600 |
| C        | -0.99595600 | 2.48926800  | -0.67094900 | H | 0.27789800  | -6.10077500 | -1.73765000 |
| C        | -0.27207600 | 3.74242900  | -0.76918900 | H | 2.54472600  | -4.21954500 | 1.41744400  |
| C        | 0.93663000  | 3.84626900  | -1.48648500 | H | 2.24117400  | -6.10202300 | -0.19726200 |
| C        | -0.77802300 | 4.89475900  | -0.12923600 | C | 1.39226700  | 0.27254600  | -0.24188300 |
| C        | 1.60660900  | 5.06690700  | -1.57923000 | N | 2.56770300  | 0.19221600  | -0.17016800 |
| H        | 1.33889800  | 2.95516900  | -1.97337500 | C | 3.94175700  | 0.13518500  | -0.06234900 |
| C        | -0.09976300 | 6.11082700  | -0.21910800 | C | 4.65091200  | -0.81193200 | -0.83659800 |
| H        | -1.69915800 | 4.81280000  | 0.45115500  | C | 4.59285100  | 1.02978800  | 0.81884800  |
| C        | 1.09187200  | 6.20427300  | -0.94643300 | C | 6.04350400  | -0.85424600 | -0.70811600 |
| H        | 2.53790900  | 5.13236000  | -2.14836700 | C | 3.92181400  | -1.74232500 | -1.76883700 |
| H        | -0.50323600 | 6.99290800  | 0.28539200  | C | 5.98639700  | 0.95296300  | 0.92002300  |
| H        | 1.62009900  | 7.15868600  | -1.01650800 | C | 3.80320200  | 2.03278000  | 1.61665600  |
| Pd       | -0.56365000 | 0.48198200  | -0.36625400 | C | 6.69665200  | 0.01924700  | 0.16331600  |
| P        | -1.49790500 | -1.72174000 | 0.00636700  | H | 6.61838400  | -1.57414600 | -1.29274300 |
| C        | -2.84766200 | -2.17833900 | -1.17643800 | H | 4.62512300  | -2.38936000 | -2.31085300 |
| C        | -4.01685700 | -2.85970300 | -0.80153100 | H | 3.21391600  | -2.38478400 | -1.21985600 |
| C        | -2.68860500 | -1.79369000 | -2.52062500 | H | 3.32871400  | -1.18067400 | -2.50909700 |

|             |             |             |             |   |             |             |             |
|-------------|-------------|-------------|-------------|---|-------------|-------------|-------------|
| H           | 6.51659200  | 1.62873500  | 1.59299400  | C | -6.29912400 | -2.03173600 | -0.71054700 |
| H           | 3.06448000  | 1.53552500  | 2.26655100  | H | -6.32219700 | -3.30545000 | 1.03852900  |
| H           | 4.46305600  | 2.64249000  | 2.24871300  | H | -5.97188100 | -0.70239900 | -2.38470700 |
| H           | 3.23431800  | 2.70868500  | 0.95721500  | H | -7.37116700 | -2.13074900 | -0.89758700 |
| Br          | 8.59372500  | -0.06425700 | 0.32100800  | C | -1.39461400 | -2.23694500 | 1.69605200  |
| <b>9-ts</b> |             |             |             | C | -0.75596700 | -3.46592300 | 1.92256500  |
| C           | -5.44856900 | 2.65477900  | -1.16780500 | C | -1.76072900 | -1.43838000 | 2.79802600  |
| O           | -6.49641100 | 2.24256500  | -0.68052400 | C | -0.49660300 | -3.89618500 | 3.22939400  |
| C           | -4.11873100 | 2.41135900  | -0.57507900 | H | -0.45669100 | -4.09463000 | 1.08194800  |
| C           | -2.95593900 | 2.80637300  | -1.30134300 | C | -1.50899600 | -1.87904500 | 4.09884200  |
| H           | -3.06802300 | 3.04623900  | -2.36495100 | H | -2.23871500 | -0.46923700 | 2.62467800  |
| C           | -3.95991300 | 1.65498400  | 0.65213900  | C | -0.87512700 | -3.10752000 | 4.31842700  |
| O           | -2.82598800 | 1.29422600  | 1.07053200  | H | 0.00172700  | -4.85538800 | 3.39316800  |
| C           | -5.53076300 | 3.47462200  | -2.45836300 | H | -1.80259400 | -1.25394200 | 4.94608200  |
| H           | -5.04521500 | 4.45769800  | -2.35601900 | H | -0.67371900 | -3.44697800 | 5.33781100  |
| H           | -5.04380400 | 2.95486300  | -3.30065200 | C | -1.03814600 | -2.77014400 | -1.17526800 |
| H           | -6.59262400 | 3.61279400  | -2.69936000 | C | -1.63937100 | -4.02819000 | -1.36638500 |
| C           | -5.15386500 | 1.23020900  | 1.48060800  | C | 0.09384200  | -2.44190300 | -1.93840700 |
| H           | -5.80636500 | 2.08631600  | 1.70304400  | C | -1.10640400 | -4.93935100 | -2.28100200 |
| H           | -5.78569500 | 0.51542600  | 0.93444600  | H | -2.53672900 | -4.29605200 | -0.80420600 |
| H           | -4.78640200 | 0.77757100  | 2.41186900  | C | 0.62640400  | -3.35466800 | -2.85569200 |
| C           | -1.69996900 | 2.91919700  | -0.78915000 | H | 0.55317400  | -1.45898400 | -1.82491300 |
| C           | -0.58186600 | 2.84543500  | -0.17337300 | C | 0.02982200  | -4.60601100 | -3.02627700 |
| C           | 0.42477700  | 3.73071400  | 0.40130900  | H | -1.58587000 | -5.91212400 | -2.41757500 |
| C           | 1.15565800  | 3.38334400  | 1.55461900  | H | 1.50525500  | -3.08008000 | -3.44472200 |
| C           | 0.67417100  | 4.98725900  | -0.19248500 | H | 0.44230300  | -5.31794400 | -3.74584800 |
| C           | 2.09382900  | 4.26258400  | 2.09891300  | C | 1.07631400  | 0.40461100  | -0.04327900 |
| H           | 0.96875500  | 2.41707100  | 2.02732800  | N | 2.23695800  | 0.21207100  | -0.12143400 |
| C           | 1.61556100  | 5.86140900  | 0.35159100  | C | 3.60011600  | 0.00838200  | -0.19388700 |
| H           | 0.11695400  | 5.26573100  | -1.08974100 | C | 4.40675500  | 0.99923000  | -0.80109200 |
| C           | 2.33160600  | 5.50414700  | 1.49966600  | C | 4.14056200  | -1.18259200 | 0.34456300  |
| H           | 2.64199000  | 3.97662600  | 3.00065200  | C | 5.78569600  | 0.77040300  | -0.86494700 |
| H           | 1.79249600  | 6.82949400  | -0.12487100 | C | 3.79619600  | 2.25966600  | -1.35220800 |
| H           | 3.06935300  | 6.18936600  | 1.92492900  | C | 5.52421100  | -1.37074700 | 0.26151900  |
| Pd          | -0.81874900 | 0.74978600  | -0.00401300 | C | 3.24891300  | -2.21073200 | 0.98823300  |
| P           | -1.72904100 | -1.53680200 | 0.02137500  | C | 6.33101800  | -0.40206000 | -0.33865800 |
| C           | -3.54513900 | -1.75673000 | -0.21682400 | H | 6.43473400  | 1.51534400  | -1.32792900 |
| C           | -4.34295700 | -2.54852700 | 0.62576500  | H | 4.55973000  | 2.89466400  | -1.82157900 |
| C           | -4.14601900 | -1.09409200 | -1.30172600 | H | 3.02318700  | 2.03453800  | -2.10496700 |
| C           | -5.71176800 | -2.68655700 | 0.37572600  | H | 3.30127300  | 2.84332500  | -0.55894500 |
| H           | -3.89818000 | -3.05904600 | 1.48231600  | H | 5.97137100  | -2.27887000 | 0.66878700  |
| C           | -5.51309800 | -1.23542900 | -1.54906300 | H | 2.50726800  | -2.60199100 | 0.27253200  |
| H           | -3.54265200 | -0.45423900 | -1.95134400 | H | 3.83527400  | -3.05731300 | 1.37068900  |
|             |             |             |             | H | 2.67885200  | -1.77956300 | 1.82719500  |

|           |             |             |             |              |             |             |             |
|-----------|-------------|-------------|-------------|--------------|-------------|-------------|-------------|
| Br        | 8.21179200  | -0.68544200 | -0.43950600 | C            | -2.13580700 | -2.07144600 | 2.08118100  |
|           |             |             |             | C            | -1.90992700 | -3.34896100 | 2.62212900  |
| <b>10</b> |             |             |             | C            | -2.78412800 | -1.09763900 | 2.86353300  |
| C         | -5.02803200 | 2.51087600  | -2.27787400 | C            | -2.32620200 | -3.64767400 | 3.92318400  |
| O         | -6.14469500 | 2.04750800  | -2.06762800 | H            | -1.40416800 | -4.11592700 | 2.03188300  |
| C         | -3.86498800 | 2.29939000  | -1.39208200 | C            | -3.20045700 | -1.40483100 | 4.16194500  |
| C         | -2.56797800 | 2.73998400  | -1.84035700 | H            | -2.96814100 | -0.10531100 | 2.44246600  |
| H         | -2.42234900 | 2.91411900  | -2.91252900 | C            | -2.97179000 | -2.67714000 | 4.69492700  |
| C         | -3.98427700 | 1.56778800  | -0.16392900 | H            | -2.14458300 | -4.64450300 | 4.33350900  |
| O         | -2.98686300 | 1.27337800  | 0.57755100  | H            | -3.70408000 | -0.64156700 | 4.76059500  |
| C         | -4.83076400 | 3.36678600  | -3.53209400 | H            | -3.29500900 | -2.91242500 | 5.71232800  |
| H         | -4.39110400 | 4.34889500  | -3.29869500 | C            | -0.36134100 | -2.84462700 | -0.09636600 |
| H         | -4.15977100 | 2.87309200  | -4.25541100 | C            | -0.48132400 | -3.65592700 | -1.23624800 |
| H         | -5.81270600 | 3.50254400  | -4.00359300 | C            | 0.81231400  | -2.93406300 | 0.67643100  |
| C         | -5.32454900 | 1.06636600  | 0.33446100  | C            | 0.54598000  | -4.53773300 | -1.59171200 |
| H         | -6.06973800 | 1.87330200  | 0.36213500  | H            | -1.38134700 | -3.60426900 | -1.85165200 |
| H         | -5.74255600 | 0.30839600  | -0.34421300 | C            | 1.83066700  | -3.82262600 | 0.32636600  |
| H         | -5.18806200 | 0.63901100  | 1.33721300  | H            | 0.92686600  | -2.31047400 | 1.56672500  |
| C         | -1.50107300 | 2.92624700  | -1.03501400 | C            | 1.70175600  | -4.62652100 | -0.81227800 |
| C         | -0.61892400 | 2.81904100  | -0.10479800 | H            | 0.43498200  | -5.16272500 | -2.48159700 |
| C         | 0.15211000  | 3.74266400  | 0.72469600  | H            | 2.73050800  | -3.88604600 | 0.94357600  |
| C         | 0.47840900  | 5.02541300  | 0.23229100  | H            | 2.50000100  | -5.32012100 | -1.08827200 |
| C         | 0.57210100  | 3.40732300  | 2.02709900  | C            | 1.00743500  | 0.48750600  | 0.16708100  |
| C         | 1.18863000  | 5.93442200  | 1.01607700  | N            | 2.16148400  | 0.31731800  | 0.01261700  |
| H         | 0.16494100  | 5.29557100  | -0.77860800 | C            | 3.51044900  | 0.11644400  | -0.20500000 |
| C         | 1.27953600  | 4.32152000  | 2.81121700  | C            | 3.92068000  | -0.46853500 | -1.42509700 |
| H         | 0.32157700  | 2.42141600  | 2.42518900  | C            | 4.42915100  | 0.50809000  | 0.79521900  |
| C         | 1.59447800  | 5.58868900  | 2.31015500  | C            | 5.29152400  | -0.65879500 | -1.63047300 |
| H         | 1.42960100  | 6.92181000  | 0.61282500  | C            | 2.90894200  | -0.87098900 | -2.46421500 |
| H         | 1.58242500  | 4.04315100  | 3.82443700  | C            | 5.79078800  | 0.29860000  | 0.55059400  |
| H         | 2.15168200  | 6.30198300  | 2.92284900  | C            | 3.95112100  | 1.13163700  | 2.07894300  |
| Pd        | -0.89241100 | 0.74597200  | 0.21441000  | C            | 6.20957900  | -0.27799200 | -0.64992000 |
| P         | -1.63923100 | -1.59410600 | 0.36923600  | H            | 5.64101000  | -1.10579300 | -2.56241700 |
| C         | -3.08994400 | -2.01421000 | -0.68376200 | H            | 3.40249700  | -1.27115700 | -3.36033000 |
| C         | -4.00371800 | -3.02590600 | -0.34043900 | H            | 2.22446100  | -1.64231200 | -2.07434100 |
| C         | -3.28993300 | -1.28351200 | -1.86719700 | H            | 2.28577900  | -0.01366500 | -2.76708900 |
| C         | -5.08793800 | -3.30789100 | -1.17437200 | H            | 6.52544000  | 0.59098200  | 1.30239700  |
| H         | -3.87390800 | -3.59242400 | 0.58409100  | H            | 3.27159100  | 0.45429200  | 2.62247100  |
| C         | -4.37521800 | -1.57023400 | -2.70061800 | H            | 4.79563500  | 1.37125400  | 2.73930800  |
| H         | -2.60576800 | -0.47217800 | -2.12853200 | H            | 3.38564600  | 2.05863400  | 1.88941700  |
| C         | -5.27548000 | -2.58140500 | -2.35538200 | Br           | 8.06955100  | -0.54901000 | -0.95653000 |
| H         | -5.79448600 | -4.09412900 | -0.89628100 |              |             |             |             |
| H         | -4.52952500 | -0.98482700 | -3.60979800 | <b>11-ts</b> |             |             |             |
| H         | -6.13132900 | -2.79546000 | -3.00039800 | C            | -3.56808100 | 3.61455100  | -2.68385900 |

|    |             |             |             |           |             |             |             |
|----|-------------|-------------|-------------|-----------|-------------|-------------|-------------|
| O  | -4.76196000 | 3.43621000  | -2.90546800 | H         | -2.13287300 | -4.08243200 | 1.91193700  |
| C  | -2.84130800 | 2.99451800  | -1.55819300 | C         | -4.30788500 | -1.32278700 | 3.57998100  |
| C  | -1.40153300 | 3.16114200  | -1.51176800 | H         | -3.65938100 | -0.03320600 | 1.96506900  |
| H  | -0.92133000 | 3.58457300  | -2.40056600 | C         | -4.23101800 | -2.59716400 | 4.15240400  |
| C  | -3.53097300 | 2.22360300  | -0.56998400 | H         | -3.38268800 | -4.58147600 | 3.99300100  |
| O  | -2.93825600 | 1.59098700  | 0.37008900  | H         | -4.91566100 | -0.54567200 | 4.05025500  |
| C  | -2.79919400 | 4.53421000  | -3.63961200 | H         | -4.77921700 | -2.81917000 | 5.07166400  |
| H  | -2.28185500 | 5.34898900  | -3.10907000 | C         | -0.73860400 | -2.94310600 | -0.04580100 |
| H  | -2.03892500 | 3.98023400  | -4.21564900 | C         | -0.91474500 | -3.90427800 | -1.05370100 |
| H  | -3.52571600 | 4.95975100  | -4.34365800 | C         | 0.40969100  | -3.00761300 | 0.76454900  |
| C  | -5.04121400 | 2.10236800  | -0.56033500 | C         | 0.03635300  | -4.91338200 | -1.24171600 |
| H  | -5.53353900 | 3.07903900  | -0.65890700 | H         | -1.79564100 | -3.86756400 | -1.69708300 |
| H  | -5.39245200 | 1.51104800  | -1.41930300 | C         | 1.35065000  | -4.02222400 | 0.58212400  |
| H  | -5.34060600 | 1.61226500  | 0.37663100  | H         | 0.56820000  | -2.25602100 | 1.54201100  |
| C  | -0.56350400 | 2.87828000  | -0.50718400 | C         | 1.16735300  | -4.97688400 | -0.42461300 |
| C  | 0.19493300  | 2.41250200  | 0.44806600  | H         | -0.11171400 | -5.65338300 | -2.03237300 |
| C  | 0.76657300  | 3.06366500  | 1.63934400  | H         | 2.23603500  | -4.06284200 | 1.22152700  |
| C  | 1.27940400  | 4.37202400  | 1.53520400  | H         | 1.90877400  | -5.76596400 | -0.57334300 |
| C  | 0.82231700  | 2.42100300  | 2.88985000  | C         | 0.89482900  | 0.57385200  | 0.29050300  |
| C  | 1.81997400  | 5.01661300  | 2.64813000  | N         | 2.01266600  | 0.21059900  | 0.08903300  |
| H  | 1.24682800  | 4.87784700  | 0.56745500  | C         | 3.33574100  | -0.00519700 | -0.20332700 |
| C  | 1.36292600  | 3.07025200  | 4.00289900  | C         | 3.73425200  | -0.08034600 | -1.56097700 |
| H  | 0.41848500  | 1.41042200  | 2.99083100  | C         | 4.26437300  | -0.15819300 | 0.85483500  |
| C  | 1.86574700  | 4.36964900  | 3.88802000  | C         | 5.08561700  | -0.30423200 | -1.84191800 |
| H  | 2.21065100  | 6.03262100  | 2.54623900  | C         | 2.72034100  | 0.07389100  | -2.66341500 |
| H  | 1.38442700  | 2.55789700  | 4.96846100  | C         | 5.60642300  | -0.38181500 | 0.52999900  |
| H  | 2.28994200  | 4.87576200  | 4.75878700  | C         | 3.80946900  | -0.07784200 | 2.28728000  |
| Pd | -1.01683800 | 0.58244300  | 0.39302300  | C         | 6.00825000  | -0.45266400 | -0.80474400 |
| P  | -1.93198700 | -1.56878100 | 0.24506200  | H         | 5.41699000  | -0.36346300 | -2.88000800 |
| C  | -3.19591700 | -1.73162800 | -1.08339200 | H         | 3.19408900  | -0.00989400 | -3.65117300 |
| C  | -4.26798700 | -2.63593400 | -0.99106800 | H         | 1.93485900  | -0.69685600 | -2.59165400 |
| C  | -3.08904200 | -0.90719900 | -2.21590700 | H         | 2.21139200  | 1.05031400  | -2.60798900 |
| C  | -5.20709400 | -2.72100200 | -2.02197700 | H         | 6.34056700  | -0.49970600 | 1.32891800  |
| H  | -4.37649600 | -3.27042600 | -0.10858000 | H         | 3.04496400  | -0.84223800 | 2.50672400  |
| C  | -4.03114700 | -0.99405200 | -3.24467700 | H         | 4.65014700  | -0.22795700 | 2.97872000  |
| H  | -2.27845200 | -0.17709200 | -2.28217300 | H         | 3.34971200  | 0.89936400  | 2.50973900  |
| C  | -5.09017800 | -1.90129700 | -3.14949400 | Br        | 7.84396400  | -0.76098700 | -1.21886300 |
| H  | -6.03936400 | -3.42468000 | -1.93944700 |           |             |             |             |
| H  | -3.94721700 | -0.33527400 | -4.11209500 | <b>12</b> |             |             |             |
| H  | -5.83269400 | -1.96111200 | -3.94922900 | C         | -2.36846800 | 5.44948800  | -1.28978900 |
| C  | -2.81891900 | -2.02646200 | 1.79473700  | O         | -3.48391300 | 5.88594800  | -1.54678100 |
| C  | -2.74368300 | -3.30367700 | 2.37332200  | C         | -2.11159600 | 4.04172700  | -0.90291700 |
| C  | -3.60370300 | -1.03190000 | 2.40920200  | C         | -0.77071000 | 3.67628000  | -0.54656200 |
| C  | -3.44808300 | -3.58484700 | 3.54877000  | H         | -0.00683100 | 4.45264300  | -0.66725700 |

|    |             |             |             |              |             |             |             |
|----|-------------|-------------|-------------|--------------|-------------|-------------|-------------|
| C  | -3.17000500 | 3.07039100  | -0.91976400 | H            | -6.13543600 | -3.96334400 | 1.88134400  |
| O  | -3.02711800 | 1.84832400  | -0.59410200 | H            | -6.85199600 | 0.03459300  | 0.41914400  |
| C  | -1.18908500 | 6.42353200  | -1.37043900 | H            | -7.70600800 | -2.07377800 | 1.44455000  |
| H  | -0.70878700 | 6.57181600  | -0.38972400 | C            | -1.28042500 | -2.63659000 | 1.22125900  |
| H  | -0.41252300 | 6.07910900  | -2.07225900 | C            | -0.94691400 | -3.97085300 | 0.94018300  |
| H  | -1.58441100 | 7.38631900  | -1.71802100 | C            | -0.96918200 | -2.10749400 | 2.48547500  |
| C  | -4.56968700 | 3.42543200  | -1.37308200 | C            | -0.32131400 | -4.76237100 | 1.90991600  |
| H  | -5.02941500 | 4.15069300  | -0.68598200 | H            | -1.17174200 | -4.39600500 | -0.04012100 |
| H  | -4.56677800 | 3.92230500  | -2.35264900 | C            | -0.35226100 | -2.90144100 | 3.45467200  |
| H  | -5.16689500 | 2.50426200  | -1.40926200 | H            | -1.20869000 | -1.06481000 | 2.71209500  |
| C  | -0.29140600 | 2.47323500  | -0.14789200 | C            | -0.02641800 | -4.23176800 | 3.16848400  |
| C  | 0.65083400  | 1.76740100  | 0.60175900  | H            | -0.06481800 | -5.79934800 | 1.67803500  |
| C  | 1.20354400  | 2.16776700  | 1.92132500  | H            | -0.11979100 | -2.47757300 | 4.43492100  |
| C  | 0.73848800  | 3.32983500  | 2.56586100  | H            | 0.46090200  | -4.85219900 | 3.92496100  |
| C  | 2.22958300  | 1.42117500  | 2.53161800  | C            | 0.70948500  | 0.42246000  | 0.05705300  |
| C  | 1.29495300  | 3.74195300  | 3.77661800  | N            | 1.47099900  | -0.50826500 | -0.29159700 |
| H  | -0.07421400 | 3.90255300  | 2.11465300  | C            | 2.86859600  | -0.46391900 | -0.46491900 |
| C  | 2.78236200  | 1.83493600  | 3.74458600  | C            | 3.48429100  | 0.44579500  | -1.35945800 |
| H  | 2.60990200  | 0.52218500  | 2.04590900  | C            | 3.63500100  | -1.44736000 | 0.20967000  |
| C  | 2.31876600  | 2.99608100  | 4.37100900  | C            | 4.87616900  | 0.38527600  | -1.52299800 |
| H  | 0.92189900  | 4.64624900  | 4.26399400  | C            | 2.68590900  | 1.44073200  | -2.16708400 |
| H  | 3.58432900  | 1.24874100  | 4.20009500  | C            | 5.02291400  | -1.46514600 | 0.03608000  |
| H  | 2.75219100  | 3.31781900  | 5.32132600  | C            | 2.95993000  | -2.45386600 | 1.10472000  |
| Pd | -1.29250700 | 0.71118300  | -0.09269300 | C            | 5.63394100  | -0.54910100 | -0.82077900 |
| P  | -2.16085700 | -1.54270000 | 0.01993100  | H            | 5.36572600  | 1.07540100  | -2.21277500 |
| C  | -2.01749100 | -2.42028000 | -1.59740200 | H            | 3.26806400  | 1.79222600  | -3.03110500 |
| C  | -3.11458200 | -3.00706400 | -2.24689600 | H            | 1.74788300  | 1.00161500  | -2.53929500 |
| C  | -0.75383000 | -2.45002400 | -2.21845300 | H            | 2.40536900  | 2.32678400  | -1.57488600 |
| C  | -2.94953900 | -3.62194300 | -3.49322200 | H            | 5.62497600  | -2.20693400 | 0.56405100  |
| H  | -4.10336600 | -2.98465600 | -1.78535500 | H            | 2.14238200  | -2.96697500 | 0.57426300  |
| C  | -0.59456400 | -3.07377600 | -3.45727400 | H            | 3.67588300  | -3.20656700 | 1.46465800  |
| H  | 0.10555400  | -1.98586100 | -1.72575900 | H            | 2.49483700  | -1.97928500 | 1.98459700  |
| C  | -1.69171200 | -3.65991600 | -4.09885100 | Br           | 7.52892700  | -0.59651400 | -1.05418100 |
| H  | -3.81234300 | -4.07262900 | -3.99045800 |              |             |             |             |
| H  | 0.39196400  | -3.09569100 | -3.92749600 | <b>13-ts</b> |             |             |             |
| H  | -1.56555800 | -4.14165300 | -5.07190400 | C            | -6.09093900 | 0.35067900  | -1.50688300 |
| C  | -3.93234400 | -1.73880800 | 0.50499200  | O            | -7.08161900 | -0.19061900 | -1.03408400 |
| C  | -4.41834300 | -2.92146700 | 1.09108000  | C            | -4.90945500 | 0.66681900  | -0.68991000 |
| C  | -4.81883500 | -0.67371700 | 0.26992900  | C            | -3.72949600 | 1.25169900  | -1.16245100 |
| C  | -5.76962000 | -3.04001300 | 1.42465200  | H            | -3.61138300 | 1.56636600  | -2.20345200 |
| H  | -3.74124000 | -3.75385300 | 1.29358400  | C            | -4.77360500 | 0.36494900  | 0.71838700  |
| C  | -6.17138100 | -0.80042300 | 0.60423900  | O            | -3.69076100 | 0.71404300  | 1.24735000  |
| H  | -4.44738000 | 0.25888900  | -0.16172400 | C            | -6.05938600 | 0.72173800  | -2.98507600 |
| C  | -6.64949700 | -1.98037000 | 1.17982800  | H            | -5.92235800 | 1.80669600  | -3.12234200 |

|    |             |             |             |           |             |             |             |
|----|-------------|-------------|-------------|-----------|-------------|-------------|-------------|
| H  | -5.22969400 | 0.21701600  | -3.50651300 | C         | 1.85432400  | -2.95212000 | 2.19043800  |
| H  | -7.01070100 | 0.41780200  | -3.44028000 | C         | -0.00998000 | -1.52973100 | 2.80618000  |
| C  | -5.80682700 | -0.35584200 | 1.53680600  | C         | 2.23912100  | -3.02223200 | 3.53306700  |
| H  | -6.76275600 | 0.18719900  | 1.50621100  | H         | 2.44054100  | -3.47636700 | 1.43284700  |
| H  | -6.01893000 | -1.34489100 | 1.10281100  | C         | 0.37230500  | -1.61014300 | 4.14780400  |
| H  | -5.44953800 | -0.45587900 | 2.57025200  | H         | -0.88071300 | -0.93175600 | 2.52009200  |
| C  | -2.61925700 | 1.40255200  | -0.33232400 | C         | 1.49826400  | -2.35516800 | 4.51340100  |
| C  | -1.66781600 | 2.36599200  | 0.02406800  | H         | 3.12288000  | -3.60147400 | 3.81281400  |
| C  | -1.92684000 | 3.80238500  | 0.26905200  | H         | -0.20767500 | -1.08070500 | 4.90783200  |
| C  | -3.25160000 | 4.28521600  | 0.29910800  | H         | 1.80180600  | -2.41112600 | 5.56197300  |
| C  | -0.88321400 | 4.72638300  | 0.47919200  | C         | -0.40656500 | 1.73074600  | 0.12164500  |
| C  | -3.51904100 | 5.63762200  | 0.51227100  | N         | 0.77213900  | 1.99181200  | 0.38286500  |
| H  | -4.08129600 | 3.58846000  | 0.16618300  | C         | 2.10586400  | 1.86652600  | 0.12326700  |
| C  | -1.15567300 | 6.07922400  | 0.69406500  | C         | 2.58631700  | 1.93855400  | -1.21540900 |
| H  | 0.15133100  | 4.38101000  | 0.47438400  | C         | 3.01000500  | 1.73736100  | 1.21257100  |
| C  | -2.47322200 | 6.54569100  | 0.70928300  | C         | 3.96343200  | 1.85313000  | -1.44034300 |
| H  | -4.55599000 | 5.98416600  | 0.53251200  | C         | 1.62243300  | 2.10346300  | -2.35912100 |
| H  | -0.32698200 | 6.77519800  | 0.85113300  | C         | 4.37963800  | 1.64923100  | 0.94561700  |
| H  | -2.68413200 | 7.60460900  | 0.87845700  | C         | 2.48366100  | 1.69480700  | 2.62153100  |
| Pd | -1.21998300 | -0.17777100 | -0.33751300 | C         | 4.84655600  | 1.70244100  | -0.36913600 |
| P  | 0.12600300  | -2.09335400 | 0.07354700  | H         | 4.34654600  | 1.90479600  | -2.46107100 |
| C  | 1.58304800  | -2.61239600 | -0.93795200 | H         | 2.15256700  | 2.16568000  | -3.31974700 |
| C  | 1.64383700  | -3.84422000 | -1.60986700 | H         | 0.91502700  | 1.25866800  | -2.41024400 |
| C  | 2.66683700  | -1.72319200 | -1.04757800 | H         | 1.01363600  | 3.01506500  | -2.24022400 |
| C  | 2.76827000  | -4.17832400 | -2.37256900 | H         | 5.08483100  | 1.54041000  | 1.77153800  |
| H  | 0.81424300  | -4.54990200 | -1.54069800 | H         | 1.84056400  | 0.81372400  | 2.78064800  |
| C  | 3.79242800  | -2.06436600 | -1.79982400 | H         | 3.30370600  | 1.65809400  | 3.35251500  |
| H  | 2.63610300  | -0.75699400 | -0.54008100 | H         | 1.86068700  | 2.57844200  | 2.83604800  |
| C  | 3.84463200  | -3.29288800 | -2.46731600 | Br        | 6.72026100  | 1.56241300  | -0.71124100 |
| H  | 2.80069800  | -5.13964600 | -2.89189100 |           |             |             |             |
| H  | 4.62783700  | -1.36319500 | -1.86572500 | <b>14</b> |             |             |             |
| H  | 4.72292000  | -3.55744700 | -3.06166800 | C         | -4.84358600 | 0.94309700  | -2.62698300 |
| C  | -1.05385400 | -3.51012300 | -0.09370200 | O         | -6.05405100 | 0.81205900  | -2.54623300 |
| C  | -1.13998300 | -4.55580300 | 0.83941800  | C         | -4.02448800 | 1.46655900  | -1.51102600 |
| C  | -1.91988600 | -3.51538300 | -1.20309800 | C         | -2.58589900 | 1.66211100  | -1.48403200 |
| C  | -2.06949400 | -5.58582000 | 0.66220300  | H         | -1.91592300 | 1.66047000  | -2.34097000 |
| H  | -0.48445900 | -4.56768100 | 1.71233000  | C         | -4.48714300 | 1.88932200  | -0.28071600 |
| C  | -2.84169100 | -4.54921700 | -1.38187100 | O         | -3.45595100 | 2.31383500  | 0.48618800  |
| H  | -1.87360100 | -2.70018000 | -1.93160200 | C         | -4.10336600 | 0.57364000  | -3.90085200 |
| C  | -2.91992800 | -5.58649600 | -0.44679400 | H         | -3.61098300 | 1.46116200  | -4.33225900 |
| H  | -2.12890800 | -6.39135800 | 1.39863100  | H         | -3.31233400 | -0.16623600 | -3.69642100 |
| H  | -3.50718900 | -4.53901800 | -2.24865900 | H         | -4.81753900 | 0.16518100  | -4.62712600 |
| H  | -3.64725100 | -6.39130100 | -0.58007000 | C         | -5.83892000 | 1.93503800  | 0.33050800  |
| C  | 0.72373500  | -2.20728300 | 1.81596300  | H         | -6.58457000 | 1.63918200  | -0.41565800 |

|    |             |             |             |           |             |             |             |
|----|-------------|-------------|-------------|-----------|-------------|-------------|-------------|
| H  | -5.89512300 | 1.24784600  | 1.19221500  | C         | 0.04733800  | -1.52853000 | 4.35939100  |
| H  | -6.05847200 | 2.94757900  | 0.70681000  | H         | -1.19268700 | -0.67806500 | 2.80667600  |
| C  | -2.27517900 | 2.17966400  | -0.22642700 | C         | 1.04924300  | -2.45475600 | 4.66799200  |
| C  | -1.01861500 | 2.68067400  | 0.35479500  | H         | 2.36252500  | -3.99131000 | 3.89520200  |
| C  | -0.86016600 | 4.08310400  | 0.79865000  | H         | -0.35854300 | -0.87816400 | 5.13824900  |
| C  | -1.83541300 | 5.05190100  | 0.47972500  | H         | 1.42733300  | -2.53336000 | 5.69052700  |
| C  | 0.25918400  | 4.50176200  | 1.54886500  | C         | -0.01750400 | 1.75035400  | 0.39555900  |
| C  | -1.69772800 | 6.37708700  | 0.89548700  | N         | 1.13900800  | 1.47725100  | 0.78502400  |
| H  | -2.71374000 | 4.76621000  | -0.10220200 | C         | 2.38899000  | 1.27904600  | 0.23674200  |
| C  | 0.39313000  | 5.82767900  | 1.96095500  | C         | 2.69554000  | 1.53641200  | -1.13100300 |
| H  | 1.02786400  | 3.77427100  | 1.81487600  | C         | 3.40327100  | 0.80689000  | 1.11774300  |
| C  | -0.58308800 | 6.77642500  | 1.63876500  | C         | 3.99413300  | 1.28924500  | -1.59161600 |
| H  | -2.46981000 | 7.10531800  | 0.63206600  | C         | 1.65490500  | 2.06403300  | -2.08157900 |
| H  | 1.27074200  | 6.12238600  | 2.54302500  | C         | 4.68959500  | 0.57724700  | 0.62269300  |
| H  | -0.47570400 | 7.81461600  | 1.96260400  | C         | 3.08642400  | 0.56125100  | 2.56870400  |
| Pd | -1.35668500 | 0.07358400  | -0.23421400 | C         | 4.97572000  | 0.81080600  | -0.72333300 |
| P  | -0.63905000 | -2.08501800 | 0.34365200  | H         | 4.23856700  | 1.47928400  | -2.63849000 |
| C  | 0.59020700  | -2.92811400 | -0.75130000 | H         | 2.07485300  | 2.19476900  | -3.08903400 |
| C  | 0.42420100  | -4.24242000 | -1.21784600 | H         | 0.79445100  | 1.37760300  | -2.15312600 |
| C  | 1.73371900  | -2.20742200 | -1.14009600 | H         | 1.25502200  | 3.03402300  | -1.74575000 |
| C  | 1.38564700  | -4.82336000 | -2.05201100 | H         | 5.47062600  | 0.21227600  | 1.29197700  |
| H  | -0.45833400 | -4.81848000 | -0.93354400 | H         | 2.28709500  | -0.18715400 | 2.68187100  |
| C  | 2.69766400  | -2.79412700 | -1.96258500 | H         | 3.97429900  | 0.20997500  | 3.11379600  |
| H  | 1.87599700  | -1.18038100 | -0.79743500 | H         | 2.71853700  | 1.47918800  | 3.05462300  |
| C  | 2.52411600  | -4.10365700 | -2.42354500 | Br        | 6.73273900  | 0.47029800  | -1.38771400 |
| H  | 1.24132800  | -5.84582400 | -2.41078500 |           |             |             |             |
| H  | 3.58367800  | -2.22113100 | -2.24699400 | <b>15</b> |             |             |             |
| H  | 3.27440700  | -4.56033700 | -3.07410200 | C         | -2.63320800 | -0.27291000 | 0.12212300  |
| C  | -2.07500900 | -3.25516000 | 0.37045900  | C         | -2.38651700 | -1.53882500 | -0.33456700 |
| C  | -2.22024000 | -4.27002600 | 1.33052100  | C         | -3.60645000 | -2.29119100 | -0.16658100 |
| C  | -3.06521800 | -3.10909400 | -0.61736400 | C         | -4.52361000 | -1.40726200 | 0.37364000  |
| C  | -3.32871100 | -5.12267500 | 1.29693700  | O         | -3.93708200 | -0.20112100 | 0.55146400  |
| H  | -1.46916000 | -4.39636500 | 2.11278600  | H         | -1.44713000 | -1.88972500 | -0.75442200 |
| C  | -4.16672100 | -3.96675600 | -0.65487300 | C         | -3.85531100 | -3.70966500 | -0.51146100 |
| H  | -2.97505700 | -2.30820400 | -1.35653800 | O         | -4.93733100 | -4.24577700 | -0.33880800 |
| C  | -4.30165300 | -4.97566800 | 0.30456800  | C         | -2.68899600 | -4.48539100 | -1.09978100 |
| H  | -3.43109900 | -5.90487700 | 2.05363000  | H         | -2.34279600 | -4.01752400 | -2.03615800 |
| H  | -4.92783300 | -3.83841500 | -1.42864800 | H         | -1.83353900 | -4.49146600 | -0.40448000 |
| H  | -5.16829700 | -5.64131200 | 0.28247700  | H         | -3.00743400 | -5.51626900 | -1.30059200 |
| C  | 0.08168600  | -2.25014200 | 2.03611800  | C         | -2.28449400 | 2.29346700  | 0.00631400  |
| C  | 1.09199500  | -3.17309600 | 2.35225500  | C         | -3.38793900 | 2.51011000  | -0.84110700 |
| C  | -0.42763300 | -1.42053600 | 3.05036900  | C         | -1.64597000 | 3.41918900  | 0.56459600  |
| C  | 1.57350800  | -3.27166000 | 3.66196200  | C         | -3.83128200 | 3.80460600  | -1.11977000 |
| H  | 1.50861300  | -3.81651800 | 1.57444900  | H         | -3.90391400 | 1.65850600  | -1.28716400 |



|              |             |             |             |    |             |             |             |
|--------------|-------------|-------------|-------------|----|-------------|-------------|-------------|
| C            | -2.08593600 | 4.71130800  | 0.27666300  | H  | -3.90557500 | 3.54490900  | 3.28409500  |
| H            | -0.80144700 | 3.27736900  | 1.24422700  | H  | -3.06928300 | 5.03840100  | 2.74036400  |
| C            | -3.18348300 | 4.91293000  | -0.56681500 | C  | -1.73098100 | 2.71858300  | -0.53588500 |
| H            | -4.69118400 | 3.94671000  | -1.77982000 | C  | -0.52627200 | 2.57724000  | -1.09076000 |
| H            | -1.57377400 | 5.56722100  | 0.72424300  | C  | 0.63169100  | 3.44549300  | -1.21421000 |
| H            | -3.53305800 | 5.92457900  | -0.78683500 | C  | 1.79058500  | 3.02049600  | -1.90356700 |
| C            | -5.95222400 | -1.52830200 | 0.76064000  | C  | 0.62446700  | 4.76471200  | -0.69812900 |
| H            | -6.57457900 | -0.82317400 | 0.18399400  | C  | 2.89328200  | 3.86043800  | -2.05539900 |
| H            | -6.28946100 | -2.55324500 | 0.56972300  | H  | 1.80340600  | 2.01579500  | -2.33138100 |
| H            | -6.08994300 | -1.28617300 | 1.82789500  | C  | 1.72245200  | 5.60867600  | -0.86895600 |
| C            | -0.52815500 | 0.70976800  | 0.67860200  | H  | -0.25463100 | 5.11036800  | -0.15223500 |
| N            | 0.57569200  | 0.53277400  | 1.15516100  | C  | 2.86606800  | 5.16279900  | -1.54120500 |
| C            | 1.87128800  | 0.26638000  | 0.68941800  | H  | 3.77639700  | 3.50365100  | -2.59299500 |
| C            | 2.26622200  | 0.50859700  | -0.64973500 | H  | 1.68892100  | 6.62388400  | -0.46333200 |
| C            | 2.78800500  | -0.22511700 | 1.64938900  | H  | 3.72654000  | 5.82493000  | -1.66813800 |
| C            | 3.59410000  | 0.24339800  | -1.00818300 | Pd | -0.80814700 | 0.60487100  | -0.43737600 |
| C            | 1.30344800  | 1.04304600  | -1.67702800 | P  | -1.91982100 | -1.51973600 | -0.07560900 |
| C            | 4.10240300  | -0.49105300 | 1.25198500  | C  | -3.10892700 | -1.92569700 | -1.43703500 |
| C            | 2.34940200  | -0.46424000 | 3.07082500  | C  | -4.26811100 | -2.69662400 | -1.24826800 |
| C            | 4.49446600  | -0.25514000 | -0.06633600 | C  | -2.83164900 | -1.41892600 | -2.71974500 |
| H            | 3.92295200  | 0.42639900  | -2.03265000 | C  | -5.12591100 | -2.95965700 | -2.32106200 |
| H            | 1.82268700  | 1.26781700  | -2.61905800 | H  | -4.50945600 | -3.08997700 | -0.25897000 |
| H            | 0.50055800  | 0.32083800  | -1.89790300 | C  | -3.68451900 | -1.69249200 | -3.79265300 |
| H            | 0.80777400  | 1.96526700  | -1.33252200 | H  | -1.94430100 | -0.79751200 | -2.87437600 |
| H            | 4.82180500  | -0.87622600 | 1.97639600  | C  | -4.83527400 | -2.46204400 | -3.59482700 |
| H            | 1.57749500  | -1.24899000 | 3.12414500  | H  | -6.02750300 | -3.55581000 | -2.15810400 |
| H            | 3.19655100  | -0.77214800 | 3.69971100  | H  | -3.45376900 | -1.29289500 | -4.78345800 |
| H            | 1.89883200  | 0.44291300  | 3.50259300  | H  | -5.50858900 | -2.66755800 | -4.43093900 |
| Br           | 6.29169200  | -0.61462500 | -0.58760800 | C  | -2.89822200 | -1.76797600 | 1.47312600  |
| C            | -1.79312100 | 0.91879300  | 0.29009600- | C  | -3.09241100 | -3.02588000 | 2.07137700  |
| <b>16-ts</b> |             |             |             | C  | -3.49311600 | -0.63801000 | 2.05754900  |
| C            | -5.29299200 | 2.17058200  | 0.62734300  | C  | -3.87825400 | -3.14582700 | 3.22122900  |
| O            | -5.95375500 | 2.52355400  | 1.59893500  | H  | -2.62671100 | -3.91610100 | 1.64324700  |
| C            | -3.89442400 | 2.56829000  | 0.44870000  | C  | -4.29173600 | -0.76191700 | 3.19820300  |
| C            | -3.01492600 | 2.16852900  | -0.59826900 | H  | -3.33299200 | 0.34721400  | 1.61567200  |
| H            | -3.34000200 | 1.64584400  | -1.49681700 | C  | -4.48365400 | -2.01668100 | 3.78306000  |
| C            | -3.20367600 | 3.50256000  | 1.26401400  | H  | -4.02005300 | -4.12844400 | 3.67891700  |
| O            | -1.99202600 | 3.72579800  | 0.91800500  | H  | -4.76361700 | 0.12777500  | 3.62212500  |
| C            | -5.91734100 | 1.28654900  | -0.44336800 | H  | -5.10233300 | -2.11567300 | 4.67870800  |
| H            | -5.87804200 | 1.77373200  | -1.43144500 | C  | -0.77378200 | -2.97492700 | -0.05886800 |
| H            | -5.38077200 | 0.32804000  | -0.53168100 | C  | -0.79394400 | -3.98137300 | -1.03676700 |
| H            | -6.96355000 | 1.09216000  | -0.17401600 | C  | 0.18397800  | -3.04960600 | 0.97004400  |
| C            | -3.76289300 | 4.24082300  | 2.44168000  | C  | 0.11876400  | -5.04195500 | -0.98340000 |
| H            | -4.76090200 | 4.64223100  | 2.21791300  | H  | -1.52644100 | -3.94613900 | -1.84531900 |

|           |             |             |             |    |             |             |             |
|-----------|-------------|-------------|-------------|----|-------------|-------------|-------------|
| C         | 1.08450900  | -4.11467100 | 1.02868800  | C  | 0.78373900  | 3.43323500  | -1.10077400 |
| H         | 0.22049600  | -2.27172300 | 1.73739700  | C  | 1.96090500  | 2.96746100  | -1.73624900 |
| C         | 1.05611100  | -5.11480600 | 0.04920100  | C  | 0.85163100  | 4.71550800  | -0.49667700 |
| H         | 0.08874500  | -5.81779100 | -1.75289000 | C  | 3.13968600  | 3.71158100  | -1.74090400 |
| H         | 1.81402600  | -4.16298600 | 1.84133200  | H  | 1.92067300  | 2.00466100  | -2.25011300 |
| H         | 1.76286500  | -5.94735800 | 0.09341000  | C  | 2.02638000  | 5.46984100  | -0.52158400 |
| C         | 1.08758400  | 0.14910200  | -0.18117000 | H  | -0.03228700 | 5.11861400  | -0.00215000 |
| N         | 2.24203400  | -0.04681500 | -0.05520600 | C  | 3.18240800  | 4.97273600  | -1.13254900 |
| C         | 3.60259000  | -0.20546800 | 0.11416000  | H  | 4.02846900  | 3.31587100  | -2.24104800 |
| C         | 4.26541200  | -1.23115200 | -0.59761000 | H  | 2.04084300  | 6.45662200  | -0.04925100 |
| C         | 4.28300300  | 0.67119200  | 0.99113900  | H  | 4.10173300  | 5.56413700  | -1.14539100 |
| C         | 5.64357600  | -1.37636100 | -0.40530800 | Pd | -0.91657400 | 0.68955300  | -0.49827600 |
| C         | 3.50682100  | -2.12941600 | -1.53792300 | P  | -1.96667900 | -1.43177800 | -0.03624800 |
| C         | 5.66090800  | 0.49073500  | 1.15576700  | C  | -3.19772800 | -1.90664400 | -1.33766500 |
| C         | 3.54381600  | 1.76669200  | 1.71156000  | C  | -4.30981400 | -2.72989000 | -1.09363700 |
| C         | 6.32579800  | -0.52379700 | 0.46469700  | C  | -2.99364700 | -1.40780800 | -2.63682200 |
| H         | 6.18440700  | -2.15878200 | -0.93993300 | C  | -5.19388200 | -3.04983600 | -2.12849300 |
| H         | 4.17541500  | -2.86523200 | -2.00553500 | H  | -4.49658700 | -3.11844200 | -0.09098300 |
| H         | 2.70563400  | -2.67476300 | -1.01376400 | C  | -3.87281000 | -1.73799300 | -3.67210600 |
| H         | 3.02277100  | -1.54705600 | -2.33922600 | H  | -2.14327500 | -0.74786600 | -2.83319900 |
| H         | 6.21459900  | 1.14998000  | 1.82615800  | C  | -4.97660000 | -2.55813900 | -3.41921700 |
| H         | 2.71948200  | 1.36129100  | 2.32075700  | H  | -6.05895200 | -3.68552200 | -1.92263500 |
| H         | 4.21778800  | 2.32796300  | 2.37282800  | H  | -3.69907900 | -1.34337800 | -4.67642000 |
| H         | 3.09086300  | 2.47407100  | 0.99748300  | H  | -5.67091500 | -2.80846500 | -4.22541500 |
| Br        | 8.20199600  | -0.74802700 | 0.70958900  | C  | -2.85753100 | -1.66112500 | 1.56824800  |
| <b>17</b> |             |             |             | C  | -3.07775800 | -2.92606300 | 2.14474700  |
| C         | -5.12351800 | 2.00885500  | 0.54142300  | C  | -3.34022500 | -0.52102700 | 2.23041500  |
| O         | -5.80319400 | 2.37344900  | 1.49114200  | C  | -3.78295500 | -3.04217000 | 3.34531100  |
| C         | -3.74712600 | 2.49592300  | 0.31006700  | H  | -2.69093600 | -3.82544000 | 1.66052900  |
| C         | -2.79240700 | 2.05899300  | -0.71164600 | C  | -4.05651400 | -0.63997000 | 3.42541300  |
| H         | -3.09826700 | 1.66262500  | -1.67883800 | H  | -3.15282300 | 0.46830900  | 1.81000600  |
| C         | -3.17324600 | 3.58484700  | 0.93468200  | C  | -4.27909000 | -1.90065200 | 3.98460900  |
| O         | -1.94854200 | 3.86038000  | 0.43925700  | H  | -3.94593700 | -4.03035000 | 3.78350900  |
| C         | -5.68314200 | 1.03483800  | -0.47850500 | H  | -4.44020200 | 0.25916300  | 3.91307600  |
| H         | -5.69620800 | 1.49247800  | -1.48172400 | H  | -4.83464100 | -1.99547700 | 4.92114800  |
| H         | -5.05925500 | 0.13061300  | -0.54935400 | C  | -0.79213000 | -2.86564700 | -0.03073800 |
| H         | -6.70429500 | 0.75722200  | -0.18737200 | C  | -0.77755000 | -3.84707700 | -1.03381100 |
| C         | -3.66939100 | 4.50073500  | 1.99500500  | C  | 0.15382100  | -2.94592700 | 1.00853300  |
| H         | -4.69319100 | 4.22867000  | 2.27325900  | C  | 0.15710000  | -4.88901900 | -0.99447200 |
| H         | -3.02188200 | 4.43740000  | 2.88630100  | H  | -1.50029700 | -3.80763900 | -1.85077300 |
| H         | -3.62844100 | 5.54436700  | 1.64145700  | C  | 1.07821700  | -3.99098000 | 1.05143000  |
| C         | -1.65770700 | 2.92108300  | -0.58151200 | H  | 0.16168000  | -2.18902200 | 1.79724500  |
| C         | -0.44305000 | 2.64070600  | -1.17401200 | C  | 1.08359700  | -4.96696200 | 0.04762600  |
|           |             |             |             | H  | 0.15282800  | -5.64634000 | -1.78271900 |

|              |             |             |             |   |             |             |             |
|--------------|-------------|-------------|-------------|---|-------------|-------------|-------------|
| H            | 1.79893500  | -4.04333200 | 1.87156500  | C | -1.60287500 | 2.50612000  | 5.22088900  |
| H            | 1.80774200  | -5.78493100 | 0.08055100  | H | -0.58429200 | 0.62757800  | 5.57940500  |
| C            | 0.96624300  | 0.16583200  | -0.22664200 | H | -2.46064800 | 4.37087900  | 4.54161200  |
| N            | 2.11246000  | -0.06618700 | -0.09956900 | H | -2.00521900 | 2.58526500  | 6.23382500  |
| C            | 3.46988000  | -0.25696200 | 0.06180500  | P | 2.86091500  | -0.93176400 | -0.04754500 |
| C            | 4.12080300  | -1.23554300 | -0.72326500 | C | 4.36731200  | -1.08368100 | 1.01800900  |
| C            | 4.15900300  | 0.54287900  | 1.00292300  | C | 2.23520600  | -2.67388900 | -0.12878800 |
| C            | 5.49671600  | -1.41215600 | -0.54082100 | C | 3.53745800  | -0.62768800 | -1.74234200 |
| C            | 3.35348800  | -2.05238400 | -1.72847700 | C | 4.86961800  | 0.08706500  | 1.61300300  |
| C            | 5.53419300  | 0.33318800  | 1.15479100  | C | 5.01946600  | -2.30376000 | 1.26227800  |
| C            | 3.43311800  | 1.59185300  | 1.80151100  | C | 2.49785900  | -3.54408100 | -1.19853300 |
| C            | 6.18779300  | -0.63522200 | 0.39076500  | C | 1.44368900  | -3.13087900 | 0.94048300  |
| H            | 6.02849300  | -2.15897900 | -1.13248100 | C | 2.66411500  | -0.10209900 | -2.71170800 |
| H            | 4.01723700  | -2.75035900 | -2.25694200 | C | 4.87175000  | -0.88361600 | -2.09829900 |
| H            | 2.55432300  | -2.63598600 | -1.24393300 | C | 6.00811300  | 0.04158500  | 2.42111700  |
| H            | 2.86730000  | -1.40601400 | -2.47755000 | H | 4.35691500  | 1.03946300  | 1.44786700  |
| H            | 6.09488500  | 0.93391400  | 1.87255600  | C | 6.15556300  | -2.34804300 | 2.07671000  |
| H            | 2.59366600  | 1.15546900  | 2.36711200  | H | 4.63777200  | -3.22694700 | 0.82125400  |
| H            | 4.11020800  | 2.08332400  | 2.51325400  | C | 1.98447600  | -4.84632200 | -1.19474400 |
| H            | 3.00564000  | 2.36358200  | 1.14034000  | H | 3.10387200  | -3.20721000 | -2.04205300 |
| Br           | 8.06076200  | -0.89928600 | 0.62035000  | C | 0.94279700  | -4.43440500 | 0.94867500  |
| <b>18-ts</b> |             |             |             | H | 1.21324500  | -2.45595300 | 1.76946600  |
| C            | -0.40860700 | 3.04973700  | 0.14745300  | C | 3.10983300  | 0.14248600  | -4.01258700 |
| C            | 0.25061100  | 3.63465200  | -0.90938400 | H | 1.63075100  | 0.12813600  | -2.43817500 |
| C            | -0.72276900 | 4.26987400  | -1.75297200 | C | 5.31857800  | -0.62826900 | -3.39916100 |
| C            | -1.94937700 | 4.04508200  | -1.14222400 | H | 5.57055100  | -1.27824500 | -1.35780900 |
| O            | -1.77699000 | 3.32524800  | -0.02212900 | C | 6.65339500  | -1.17690700 | 2.65511800  |
| H            | 1.32961400  | 3.61835100  | -1.03716300 | H | 6.38568500  | 0.96014200  | 2.87735900  |
| C            | -0.49004600 | 5.02612600  | -3.00265300 | H | 6.65142300  | -3.30453700 | 2.26165100  |
| O            | -1.39676000 | 5.52566400  | -3.64980200 | C | 1.21065200  | -5.29562100 | -0.12163000 |
| C            | 0.95304600  | 5.16050400  | -3.45997100 | H | 2.19404000  | -5.51200500 | -2.03614900 |
| H            | 1.55340800  | 5.68580100  | -2.69902000 | H | 0.33356500  | -4.77635500 | 1.78926000  |
| H            | 1.41320000  | 4.16941700  | -3.60474200 | C | 4.43973400  | -0.11915600 | -4.35903300 |
| H            | 0.98072500  | 5.72299300  | -4.40206700 | H | 2.41858000  | 0.54874100  | -4.75549600 |
| C            | 0.06193500  | 2.23230600  | 1.23876300  | H | 6.36100500  | -0.82732700 | -3.66115200 |
| Pd           | 1.33057200  | 0.71478800  | 0.65704000  | H | 7.53935400  | -1.21463300 | 3.29418800  |
| C            | -0.54739400 | 2.29998500  | 2.57387900  | H | 0.81205500  | -6.31334200 | -0.11999000 |
| C            | -0.28090000 | 1.32093300  | 3.56588600  | H | 4.79194100  | 0.08087000  | -5.37423200 |
| C            | -1.35099600 | 3.39798300  | 2.97378900  | C | -3.33621700 | 4.45301600  | -1.48713700 |
| C            | -0.80978100 | 1.41092400  | 4.84982000  | H | -3.77193900 | 5.06745300  | -0.68105400 |
| H            | 0.36623500  | 0.47852000  | 3.30752800  | H | -3.32291500 | 5.02773600  | -2.41997600 |
| C            | -1.85414000 | 3.50093500  | 4.27289200  | H | -3.98401900 | 3.56817800  | -1.60769300 |
| H            | -1.57628800 | 4.18863600  | 2.25795600  | C | -0.59208400 | 0.28196900  | 0.53527400  |
|              |             |             |             | N | -1.56648100 | -0.34189200 | 0.28405500  |

|              |             |             |             |    |             |             |             |
|--------------|-------------|-------------|-------------|----|-------------|-------------|-------------|
| C            | -2.77436400 | -0.96207100 | 0.04486300  | H  | 1.69719400  | 6.26805300  | 1.31597900  |
| C            | -3.91116100 | -0.56059400 | 0.78783500  | H  | 2.19923300  | 3.84847000  | 4.85326400  |
| C            | -2.83879700 | -1.97434900 | -0.94159400 | H  | 2.54274200  | 6.01667800  | 3.65402300  |
| C            | -5.12400300 | -1.20960500 | 0.53028400  | Pd | 0.69921300  | 0.15109500  | 0.26299400  |
| C            | -3.81422000 | 0.53538100  | 1.81347700  | P  | 2.70015000  | 0.93620900  | -0.87084200 |
| C            | -4.07150900 | -2.59469300 | -1.17098600 | P  | 0.37747000  | -2.20292900 | -0.22913400 |
| C            | -1.61276500 | -2.36518000 | -1.72280300 | C  | 2.51832100  | 2.64385400  | -1.55949800 |
| C            | -5.19590500 | -2.21400100 | -0.43645000 | C  | 1.40497000  | 2.88317400  | -2.38572300 |
| H            | -6.01704300 | -0.92235400 | 1.08761800  | C  | 3.39918200  | 3.70380500  | -1.29379500 |
| H            | -4.79320400 | 0.73594300  | 2.26976000  | C  | 1.19668200  | 4.13962800  | -2.95998100 |
| H            | -3.10602900 | 0.27729000  | 2.61729200  | H  | 0.69169900  | 2.07655800  | -2.57507300 |
| H            | -3.43884900 | 1.46896400  | 1.36455500  | C  | 3.18316600  | 4.96471300  | -1.85911600 |
| H            | -4.15047700 | -3.37829100 | -1.92625400 | H  | 4.25484600  | 3.55554900  | -0.63382000 |
| H            | -0.80632500 | -2.71173500 | -1.05706700 | C  | 2.08725800  | 5.18570800  | -2.69769000 |
| H            | -1.83939500 | -3.16864000 | -2.43695900 | H  | 0.32855500  | 4.30538400  | -3.60317700 |
| H            | -1.21070300 | -1.50768700 | -2.28741600 | H  | 3.87752900  | 5.77958200  | -1.63821400 |
| Br           | -6.86243000 | -3.07912700 | -0.76242100 | H  | 1.92203000  | 6.17198100  | -3.13906800 |
| <b>19-ts</b> |             |             |             | C  | 4.06934600  | 1.03477000  | 0.37127000  |
| C            | -2.60532900 | -0.94838100 | 4.54687000  | C  | 5.40256200  | 1.28743100  | -0.00407900 |
| O            | -2.61226000 | -1.83571700 | 5.39060600  | C  | 3.77430100  | 0.81638900  | 1.72670700  |
| C            | -1.42859900 | -0.65948000 | 3.69384000  | C  | 6.41205500  | 1.34165700  | 0.95901700  |
| C            | -1.48616800 | 0.39057200  | 2.77955700  | H  | 5.65732400  | 1.43091600  | -1.05667200 |
| H            | -2.38708000 | 1.01798900  | 2.82357800  | C  | 4.78924500  | 0.86691800  | 2.68870700  |
| C            | -0.15447900 | -1.40934600 | 3.84059000  | H  | 2.74964300  | 0.58996300  | 2.03212400  |
| O            | 0.86182500  | -1.01645500 | 3.26563600  | C  | 6.10630800  | 1.13309200  | 2.30893800  |
| C            | -3.87489000 | -0.11064100 | 4.37523900  | H  | 7.44286500  | 1.54030000  | 0.65377000  |
| H            | -3.69351000 | 0.95460600  | 4.59139400  | H  | 4.54184400  | 0.69150900  | 3.73847800  |
| H            | -4.27888600 | -0.17880600 | 3.35288700  | H  | 6.89841800  | 1.17079200  | 3.06154000  |
| H            | -4.62056600 | -0.49372600 | 5.08353300  | C  | 3.56284700  | 0.04755500  | -2.26190100 |
| C            | -0.07252900 | -2.65038100 | 4.70486700  | C  | 3.64115600  | 0.55035500  | -3.57123000 |
| H            | -0.27186700 | -2.40104600 | 5.75709900  | C  | 4.11977400  | -1.21740000 | -1.99302800 |
| H            | -0.84232700 | -3.38350600 | 4.42630400  | C  | 4.25827000  | -0.19295400 | -4.58462000 |
| H            | 0.93337300  | -3.07899900 | 4.59694800  | H  | 3.22832000  | 1.53211900  | -3.80911300 |
| C            | -0.57684600 | 0.81379000  | 1.81311500  | C  | 4.74125000  | -1.95273300 | -3.00369100 |
| C            | -0.01995700 | 1.89690400  | 1.28680900  | H  | 4.07319900  | -1.63307500 | -0.98379100 |
| C            | 0.68326500  | 3.05087700  | 1.88500600  | C  | 4.81062700  | -1.44490300 | -4.30567400 |
| C            | 0.88860500  | 4.27330700  | 1.22185800  | H  | 4.31329700  | 0.21860000  | -5.59610900 |
| C            | 1.17568100  | 2.91801700  | 3.20202800  | H  | 5.16866200  | -2.93097500 | -2.77007200 |
| C            | 1.55142300  | 5.32763900  | 1.85444200  | H  | 5.29520900  | -2.02239500 | -5.09713600 |
| H            | 0.52091300  | 4.39199500  | 0.20233200  | C  | -0.98218200 | -3.07536300 | 0.68174000  |
| C            | 1.83398100  | 3.97519700  | 3.83041500  | C  | -0.82770800 | -4.34384500 | 1.26364300  |
| H            | 1.03654200  | 1.96882400  | 3.72355300  | C  | -2.23617700 | -2.44538200 | 0.75830400  |
| C            | 2.02653400  | 5.18861500  | 3.16133800  | C  | -1.90587200 | -4.96931000 | 1.89999300  |
|              |             |             |             | H  | 0.13769700  | -4.85148000 | 1.22312900  |

|    |             |             |             |           |             |             |             |
|----|-------------|-------------|-------------|-----------|-------------|-------------|-------------|
| C  | -3.31583300 | -3.07819400 | 1.37714100  | H         | -3.76292700 | 4.30255600  | 0.74554400  |
| H  | -2.36452400 | -1.44568600 | 0.33610800  | N         | -2.22580600 | 2.30730600  | -0.47797300 |
| C  | -3.15288600 | -4.34207500 | 1.95430600  | C         | -1.12668200 | 2.58836400  | -0.12372500 |
| H  | -1.76704000 | -5.95384200 | 2.35432200  |           |             |             |             |
| H  | -4.28611000 | -2.57671800 | 1.42073300  | <b>20</b> |             |             |             |
| H  | -3.99362000 | -4.83106600 | 2.45255100  | C         | 0.39453900  | -4.76997300 | 1.83887900  |
| C  | 1.84733200  | -3.28279500 | 0.09050800  | O         | -0.28265700 | -5.56669900 | 2.48597100  |
| C  | 2.27175100  | -4.28761700 | -0.79401500 | C         | -0.16697700 | -3.66648500 | 1.04795400  |
| C  | 2.57552500  | -3.05869900 | 1.27454500  | C         | 0.71789800  | -2.79053700 | 0.28636300  |
| C  | 3.40469300  | -5.05514500 | -0.50223800 | H         | 1.67886500  | -3.24176200 | 0.00965500  |
| H  | 1.72163400  | -4.47222900 | -1.71861500 | C         | -1.55749700 | -3.52028000 | 0.88639900  |
| C  | 3.70286800  | -3.83305100 | 1.56308600  | O         | -2.09940100 | -2.53055300 | 0.25777700  |
| H  | 2.25063000  | -2.28592000 | 1.97743500  | C         | 1.91772100  | -4.92616900 | 1.88275300  |
| C  | 4.12309600  | -4.82971300 | 0.67551900  | H         | 2.32408800  | -5.19159900 | 0.89236600  |
| H  | 3.72468700  | -5.83340100 | -1.20038000 | H         | 2.41880500  | -3.99876400 | 2.20217600  |
| H  | 4.25870300  | -3.65011800 | 2.48628000  | H         | 2.15253500  | -5.73344400 | 2.58867600  |
| H  | 5.00900300  | -5.42916000 | 0.90142000  | C         | -2.56150300 | -4.53317000 | 1.39152300  |
| C  | -0.07362500 | -2.59536200 | -1.99160400 | H         | -2.26959900 | -5.56074000 | 1.13720200  |
| C  | -0.98819400 | -3.60532700 | -2.33937800 | H         | -2.60507000 | -4.51381900 | 2.49156700  |
| C  | 0.52236800  | -1.84747600 | -3.02215700 | H         | -3.54745500 | -4.28868100 | 0.97282400  |
| C  | -1.29441900 | -3.85931900 | -3.68032900 | C         | 0.51518700  | -1.55332800 | -0.22440900 |
| H  | -1.46901500 | -4.20009300 | -1.56112500 | C         | 1.41825600  | -0.98717500 | -1.26887600 |
| C  | 0.22338500  | -2.10822700 | -4.36216700 | C         | 1.12657600  | -1.19657300 | -2.71900100 |
| H  | 1.23250400  | -1.05779400 | -2.77629900 | C         | 1.79857700  | -0.47075100 | -3.72619700 |
| C  | -0.68923100 | -3.11351000 | -4.69597100 | C         | 0.17082500  | -2.14915100 | -3.12521800 |
| H  | -2.00935800 | -4.64783700 | -3.93005500 | C         | 1.53459800  | -0.69515500 | -5.07731300 |
| H  | 0.70690300  | -1.51932000 | -5.14568500 | H         | 2.53886800  | 0.28207600  | -3.44476300 |
| H  | -0.92828100 | -3.31504400 | -5.74353000 | C         | -0.09160300 | -2.37011200 | -4.48072700 |
| C  | -6.09606500 | 1.17464100  | -1.43201000 | H         | -0.35792500 | -2.72925400 | -2.36763200 |
| C  | -5.88096400 | 2.06449800  | -0.37753000 | C         | 0.58551700  | -1.64757600 | -5.46671000 |
| C  | -4.58275300 | 2.45928500  | -0.03952700 | H         | 2.07551200  | -0.12001200 | -5.83412300 |
| C  | -3.50538400 | 1.92974000  | -0.79367300 | H         | -0.82714400 | -3.12769500 | -4.76578900 |
| C  | -3.71557000 | 1.03707200  | -1.87421500 | H         | 0.38101600  | -1.82554100 | -6.52543200 |
| C  | -5.02939900 | 0.66523700  | -2.17584000 | Pd        | -1.27744500 | -0.63217000 | 0.08499200  |
| H  | -6.72808800 | 2.45623200  | 0.18792700  | P         | -3.76146100 | 0.00067600  | -0.16772600 |
| H  | -5.21802300 | -0.02457200 | -3.00006200 | P         | -0.27393400 | 1.39218500  | 0.67866700  |
| Br | -7.87657400 | 0.65192200  | -1.86606800 | C         | -4.44807600 | -1.20072500 | -1.39772400 |
| C  | -2.55155000 | 0.52723900  | -2.67978900 | C         | -3.63698400 | -1.58228900 | -2.47964900 |
| H  | -1.77443600 | 0.08319500  | -2.03801700 | C         | -5.74324600 | -1.73311100 | -1.30086500 |
| H  | -2.86988100 | -0.23146700 | -3.40720000 | C         | -4.11943800 | -2.45749600 | -3.45597600 |
| H  | -2.06925500 | 1.35094900  | -3.23369600 | H         | -2.61387200 | -1.20683000 | -2.55756100 |
| C  | -4.32704000 | 3.42051900  | 1.09008600  | C         | -6.21962000 | -2.61890100 | -2.27192900 |
| H  | -5.26908900 | 3.76574400  | 1.53761900  | H         | -6.38696800 | -1.46532300 | -0.46128100 |
| H  | -3.72015200 | 2.95553500  | 1.88544800  | C         | -5.41178900 | -2.97998500 | -3.35378900 |

|   |             |             |             |           |             |             |             |
|---|-------------|-------------|-------------|-----------|-------------|-------------|-------------|
| H | -3.47479300 | -2.73900500 | -4.29215200 | H         | -2.68054200 | 5.51478800  | 2.33443000  |
| H | -7.22845300 | -3.02954400 | -2.17924200 | H         | -3.07619000 | 1.94668600  | 4.73062900  |
| H | -5.78595800 | -3.67298200 | -4.11177400 | H         | -3.57404400 | 4.37003900  | 4.36618100  |
| C | -4.82772000 | -0.22684200 | 1.32546300  | C         | 0.23517100  | 2.54939700  | -0.66401200 |
| C | -6.08436600 | 0.38257000  | 1.48896100  | C         | 0.84586600  | 3.80149000  | -0.44936600 |
| C | -4.35669800 | -1.08924100 | 2.33102700  | C         | -0.04458400 | 2.15907700  | -1.98394200 |
| C | -6.84534200 | 0.14099400  | 2.63665000  | C         | 1.17840300  | 4.62589300  | -1.52686300 |
| H | -6.47525700 | 1.05222900  | 0.72047600  | H         | 1.04853700  | 4.15354900  | 0.56265500  |
| C | -5.12218500 | -1.33336100 | 3.47463900  | C         | 0.28493200  | 2.98683300  | -3.06161000 |
| H | -3.39192900 | -1.58290600 | 2.20238800  | H         | -0.52150800 | 1.19495600  | -2.16921500 |
| C | -6.36638200 | -0.71584600 | 3.63225400  | C         | 0.90067600  | 4.21941700  | -2.83631100 |
| H | -7.81965000 | 0.62362000  | 2.75029100  | H         | 1.65099900  | 5.59378100  | -1.34061800 |
| H | -4.74317500 | -2.01100100 | 4.24388500  | H         | 0.06169100  | 2.65761200  | -4.07894500 |
| H | -6.96372700 | -0.90372700 | 4.52823500  | H         | 1.16007000  | 4.86711600  | -3.67773600 |
| C | -4.29035900 | 1.63332100  | -0.86979800 | C         | 7.61625400  | 0.05683900  | 0.09352300  |
| C | -4.46071500 | 1.80817000  | -2.25500300 | C         | 6.78126500  | -0.97869700 | 0.51167800  |
| C | -4.44624000 | 2.75096800  | -0.03013900 | C         | 5.40755500  | -0.93918800 | 0.23931400  |
| C | -4.78195300 | 3.06210100  | -2.78245900 | C         | 4.88917600  | 0.18197300  | -0.45366800 |
| H | -4.35304200 | 0.95930100  | -2.93213700 | C         | 5.73594300  | 1.23913600  | -0.86731700 |
| C | -4.77763400 | 4.00089000  | -0.55956900 | C         | 7.10572600  | 1.15768600  | -0.59424000 |
| H | -4.31931800 | 2.64960300  | 1.04848000  | H         | 7.19787600  | -1.83126100 | 1.05088600  |
| C | -4.94540300 | 4.16293200  | -1.93763100 | H         | 7.77216600  | 1.96073000  | -0.91363400 |
| H | -4.91300700 | 3.17379500  | -3.86193500 | Br        | 9.48407400  | -0.03072000 | 0.47400200  |
| H | -4.90204300 | 4.85267400  | 0.11402500  | C         | 5.17065900  | 2.42300300  | -1.60836700 |
| H | -5.20385300 | 5.14139700  | -2.35047400 | H         | 4.29054600  | 2.83337100  | -1.09008700 |
| C | 1.17763100  | 1.10639000  | 1.81091000  | H         | 5.92337600  | 3.21650200  | -1.72109200 |
| C | 1.09510600  | 0.00542300  | 2.68250300  | H         | 4.82732300  | 2.13629600  | -2.61663700 |
| C | 2.30146900  | 1.94272000  | 1.89496800  | C         | 4.52037300  | -2.07035300 | 0.68514500  |
| C | 2.09078600  | -0.23026100 | 3.63420400  | H         | 5.07469700  | -2.77617200 | 1.31937900  |
| H | 0.25937400  | -0.69231300 | 2.60268100  | H         | 3.65131900  | -1.70466300 | 1.25427200  |
| C | 3.30283600  | 1.69988400  | 2.83997900  | H         | 4.12324900  | -2.63181300 | -0.17562800 |
| H | 2.42545000  | 2.77846600  | 1.20917000  | N         | 3.52379500  | 0.34257000  | -0.72166700 |
| C | 3.19720300  | 0.61924300  | 3.71908900  | C         | 2.55421200  | -0.36533200 | -0.93650000 |
| H | 2.00328000  | -1.09133500 | 4.30146700  |           |             |             |             |
| H | 4.17373200  | 2.35871900  | 2.88183000  | <b>21</b> |             |             |             |
| H | 3.98034500  | 0.43267000  | 4.45830700  | C         | -3.82138900 | -0.69406900 | 0.00699500  |
| C | -1.35687700 | 2.40622100  | 1.80614900  | O         | -4.79289200 | 0.04158200  | 0.02471300  |
| C | -1.66993000 | 3.75788400  | 1.59414400  | C         | -2.42483300 | -0.15293100 | 0.00166100  |
| C | -1.88344500 | 1.76753600  | 2.94440300  | C         | -1.37292800 | -1.03605300 | 0.00033800  |
| C | -2.45646900 | 4.46009100  | 2.51482900  | H         | -1.60854400 | -2.10471500 | -0.00067800 |
| H | -1.31625300 | 4.27536400  | 0.70315200  | C         | -2.13871800 | 1.33315600  | -0.00024500 |
| C | -2.67647300 | 2.46574900  | 3.85624300  | O         | -0.98208200 | 1.71469900  | 0.02121600  |
| H | -1.67573100 | 0.71113600  | 3.12484800  | C         | -4.03965300 | -2.20393200 | -0.00833900 |
| C | -2.95918400 | 3.82020300  | 3.64916500  | H         | -3.59707600 | -2.67174800 | -0.90194000 |

|                           |             |             |             |   |             |             |             |
|---------------------------|-------------|-------------|-------------|---|-------------|-------------|-------------|
| H                         | -3.59767600 | -2.68845700 | 0.87670400  | N | -1.08949000 | -0.01991400 | 1.07906600  |
| H                         | -5.12217500 | -2.38241700 | -0.00946300 | N | 1.08942900  | -0.02010000 | 1.07910800  |
| C                         | -3.26407500 | 2.34387300  | -0.03293400 | C | -0.00001700 | -0.00467700 | 0.27940500  |
| H                         | -3.90995400 | 2.19398700  | -0.91020400 | C | -0.68169800 | -0.04448900 | 2.40345900  |
| H                         | -3.92341300 | 2.23132600  | 0.83983900  | H | -1.39756700 | -0.05865000 | 3.22056100  |
| H                         | -2.81245500 | 3.34471900  | -0.05020800 | C | 0.68158300  | -0.04464500 | 2.40348900  |
| C                         | 0.00359100  | -0.76543700 | -0.00023600 | H | 1.39743000  | -0.05895000 | 3.22061500  |
| C                         | 1.22397600  | -0.66591200 | -0.00112200 | C | -2.47450100 | -0.01427400 | 0.64241700  |
| C                         | 2.61404100  | -0.36538500 | -0.00079200 | C | -3.11686500 | 1.23136900  | 0.46681200  |
| C                         | 3.59320600  | -1.38339700 | -0.00726000 | C | -4.45816100 | 1.20201500  | 0.05884600  |
| C                         | 3.02570300  | 0.98801200  | 0.00628100  | H | -4.99412000 | 2.14184500  | -0.08896000 |
| C                         | 4.94731000  | -1.05358400 | -0.00667400 | C | -5.12176300 | -0.00481000 | -0.15648200 |
| H                         | 3.27605200  | -2.42832500 | -0.01271700 | H | -6.16780000 | -0.00112000 | -0.47189100 |
| C                         | 4.38192300  | 1.30630400  | 0.00678600  | C | -4.45913300 | -1.21650200 | 0.03361700  |
| H                         | 2.26077600  | 1.76730000  | 0.01133700  | H | -4.99604500 | -2.15250400 | -0.13347900 |
| C                         | 5.34417800  | 0.28891900  | 0.00030400  | C | -3.11765100 | -1.25559100 | 0.43974900  |
| H                         | 5.69960300  | -1.84615700 | -0.01168900 | C | -2.42964800 | -2.60043200 | 0.66135100  |
| H                         | 4.69344000  | 2.35375600  | 0.01230700  | H | -1.37291400 | -2.40927400 | 0.90488900  |
| H                         | 6.40722800  | 0.54311000  | 0.00070400  | C | -2.44605900 | -3.47258400 | -0.60661100 |
| <b>CuOTf</b>              |             |             |             | H | -3.47058500 | -3.75355000 | -0.89670700 |
| S                         | -0.21673800 | 0.78843200  | 0.00011600  | H | -1.88618100 | -4.40550200 | -0.43611900 |
| O                         | -0.86986100 | 2.08465100  | 0.00035000  | H | -1.98784400 | -2.95291700 | -1.46342900 |
| O                         | 0.61175400  | 0.41463100  | -1.21613100 | C | -3.04141900 | -3.34815300 | 1.86113800  |
| C                         | -1.57294200 | -0.50049600 | 0.00015100  | H | -4.09890200 | -3.59869400 | 1.68185900  |
| F                         | -2.32898200 | -0.36900000 | 1.08300900  | H | -2.99475200 | -2.74663500 | 2.78247900  |
| F                         | -2.32945200 | -0.36857600 | -1.08232800 | H | -2.50233600 | -4.29111800 | 2.04367900  |
| F                         | -1.02264500 | -1.71879600 | -0.00020400 | C | -2.42738800 | 2.57123600  | 0.71272700  |
| O                         | 0.61206600  | 0.41435200  | 1.21606500  | H | -1.37972400 | 2.37270600  | 0.98734500  |
| Cu                        | 2.11046600  | -0.37288500 | -0.00032200 | C | -3.06808400 | 3.32251000  | 1.89470800  |
| <b>AgOTf</b>              |             |             |             | H | -2.52497200 | 4.25944200  | 2.09544400  |
| S                         | -0.67894600 | 0.78600000  | 0.00000000  | H | -3.05503500 | 2.71842300  | 2.81542800  |
| O                         | -1.37345000 | 2.06321200  | -0.00000300 | H | -4.11688000 | 3.58526800  | 1.68469600  |
| O                         | 0.14761600  | 0.44636400  | -1.22378100 | C | -2.40197900 | 3.44301100  | -0.55551600 |
| C                         | -2.00411100 | -0.53526700 | 0.00000100  | H | -1.91748700 | 2.92118900  | -1.39668600 |
| F                         | -2.76342600 | -0.41916900 | 1.08279000  | H | -1.84648500 | 4.37551600  | -0.36898200 |
| F                         | -2.76338300 | -0.41920800 | -1.08282300 | H | -3.41691000 | 3.72348200  | -0.87820900 |
| F                         | -1.43125800 | -1.74306000 | 0.00003500  | C | 2.47445900  | -0.01456000 | 0.64255300  |
| O                         | 0.14761900  | 0.44637200  | 1.22378000  | C | 3.11716400  | 1.23103400  | 0.46775600  |
| Ag                        | 2.00289600  | -0.20806500 | 0.00000000  | C | 4.45845900  | 1.20158700  | 0.05980500  |
| <b>IPr-Au<sup>+</sup></b> |             |             |             | H | 4.99463500  | 2.14137400  | -0.08739500 |
| Au                        | 0.00008900  | 0.03955800  | -1.71165500 | C | 5.12176100  | -0.00524500 | -0.15628900 |
|                           |             |             |             | H | 6.16777900  | -0.00160600 | -0.47169300 |
|                           |             |             |             | C | 4.45884100  | -1.21689000 | 0.03303600  |
|                           |             |             |             | H | 4.99549800  | -2.15292800 | -0.13465700 |

|            |             |             |             |            |             |             |             |
|------------|-------------|-------------|-------------|------------|-------------|-------------|-------------|
| C          | 3.11734400  | -1.25591400 | 0.43914300  | H          | 5.89482400  | -1.67438200 | 1.18602800  |
| C          | 2.42902300  | -2.60073200 | 0.65994200  | H          | 6.05106100  | -1.61720600 | -0.55604000 |
| H          | 1.37220700  | -2.40949500 | 0.90309600  | H          | 6.29656800  | -0.09920900 | 0.39529400  |
| C          | 2.44585100  | -3.47244000 | -0.60835100 | C          | 1.32795700  | -0.02905700 | -0.12155700 |
| H          | 3.47043500  | -3.75396300 | -0.89772500 | C          | 0.94589300  | 1.17111700  | -0.11153600 |
| H          | 1.98865200  | -2.95218700 | -1.46536100 | C          | 0.99104400  | 2.60360000  | -0.02662800 |
| H          | 1.88524400  | -4.40505800 | -0.43861100 | C          | -0.18693200 | 3.37676400  | -0.12693800 |
| C          | 3.04014700  | -3.34904000 | 1.85967600  | C          | 2.23854400  | 3.24331100  | 0.16151200  |
| H          | 2.50095200  | -4.29208400 | 2.04146200  | C          | -0.11586800 | 4.76526700  | -0.03915500 |
| H          | 2.99300000  | -2.74798300 | 2.78129800  | H          | -1.14951100 | 2.88062500  | -0.27337900 |
| H          | 4.09771700  | -3.59950700 | 1.68083300  | C          | 2.29199200  | 4.63240300  | 0.24681900  |
| C          | 2.42793300  | 2.57093300  | 0.71426700  | H          | 3.13860900  | 2.63232600  | 0.23669400  |
| H          | 1.38053200  | 2.37240500  | 0.98991300  | C          | 1.12066600  | 5.39415500  | 0.14735800  |
| C          | 3.06971400  | 3.32241300  | 1.89550900  | H          | -1.02867800 | 5.36015300  | -0.11724800 |
| H          | 3.05772700  | 2.71841400  | 2.81629800  | H          | 3.25525800  | 5.12728900  | 0.39217200  |
| H          | 2.52662200  | 4.25925500  | 2.09671600  | H          | 1.17217200  | 6.48383800  | 0.21515300  |
| H          | 4.11823700  | 3.58538700  | 1.68442200  |            |             |             |             |
| C          | 2.40130500  | 3.44248000  | -0.55412200 | <b>22b</b> |             |             |             |
| H          | 1.84628300  | 4.37518200  | -0.36716600 | S          | -3.40690200 | -0.69279900 | -0.74176300 |
| H          | 1.91571100  | 2.92061100  | -1.39463600 | O          | -4.36949800 | -0.96504600 | -1.79690100 |
| H          | 3.41595700  | 3.72255600  | -0.87802200 | O          | -2.24832300 | -1.65910700 | -0.60005000 |
|            |             |             |             | C          | -4.33170900 | -0.90219000 | 0.87035500  |
| <b>22a</b> |             |             |             | F          | -5.32942400 | -0.02713300 | 0.94142600  |
| S          | -3.16567400 | -0.71652700 | -0.72994600 | F          | -4.82381600 | -2.13306500 | 0.96285200  |
| O          | -4.15915400 | -1.06015100 | -1.72919500 | F          | -3.50140800 | -0.69191500 | 1.89806300  |
| O          | -1.91865400 | -1.57543900 | -0.64010100 | O          | -2.84614700 | 0.70340100  | -0.64458900 |
| C          | -3.97909100 | -0.95754800 | 0.93746400  | C          | 3.99752100  | -3.09300100 | 0.19943600  |
| F          | -5.04760100 | -0.17621500 | 1.03835300  | O          | 5.16818200  | -3.40484800 | 0.31081700  |
| F          | -4.34620900 | -2.22524500 | 1.08425900  | C          | 3.59333100  | -1.64717700 | 0.10157400  |
| F          | -3.11473900 | -0.64050300 | 1.90434800  | C          | 2.25886900  | -1.33404000 | 0.08488300  |
| O          | -2.66996700 | 0.71506600  | -0.67688000 | H          | 1.54932500  | -2.16306000 | 0.11940200  |
| Cu         | -0.69586000 | 0.08990600  | -0.40990400 | C          | 4.61598800  | -0.53678000 | 0.03724700  |
| C          | 3.51544400  | -3.18294500 | 0.01546200  | O          | 4.22792600  | 0.61493300  | 0.13862400  |
| O          | 4.65754700  | -3.57377200 | 0.17063900  | C          | 2.92716100  | -4.17338400 | 0.16866900  |
| C          | 3.19094400  | -1.71415500 | 0.03056400  | H          | 2.24432900  | -4.09105300 | 1.02942300  |
| C          | 1.88050800  | -1.33343900 | -0.10915600 | H          | 2.31803300  | -4.12197400 | -0.74751600 |
| H          | 1.13997700  | -2.12769900 | -0.22987900 | H          | 3.43245100  | -5.14609000 | 0.21170200  |
| C          | 4.26100900  | -0.66050100 | 0.19852100  | C          | 6.08077900  | -0.82974300 | -0.17155100 |
| O          | 3.92386000  | 0.51091900  | 0.23704400  | H          | 6.49325400  | -1.36279000 | 0.69735400  |
| C          | 2.39782400  | -4.19453600 | -0.19505900 | H          | 6.24042600  | -1.49756900 | -1.03063200 |
| H          | 1.64310000  | -4.13979600 | 0.60548900  | H          | 6.59974300  | 0.12656500  | -0.31815100 |
| H          | 1.87797500  | -4.03729600 | -1.15319700 | C          | 1.66516400  | -0.05071700 | 0.02846300  |
| H          | 2.84864300  | -5.19456600 | -0.19086200 | C          | 1.20810300  | 1.11470100  | 0.02080400  |
| C          | 5.71983600  | -1.02981200 | 0.31256800  | C          | 1.15657200  | 2.54751700  | 0.07872800  |



|            |             |             |             |   |             |             |             |
|------------|-------------|-------------|-------------|---|-------------|-------------|-------------|
| C          | -0.06538500 | 3.25607300  | 0.05625800  | C | 1.12995900  | -1.31125500 | 0.05665600  |
| C          | 2.37799200  | 3.25781600  | 0.16490400  | C | 2.93382600  | -2.65841000 | 0.14459700  |
| C          | -0.06318900 | 4.64760200  | 0.12227300  | H | 3.99146500  | -2.90558000 | 0.14888200  |
| H          | -1.01170700 | 2.71376800  | -0.01412200 | C | 1.82782100  | -3.44636500 | 0.23228000  |
| C          | 2.36227200  | 4.64858300  | 0.23005100  | H | 1.72081000  | -4.52284800 | 0.32915600  |
| H          | 3.31426300  | 2.69888800  | 0.17742300  | C | 3.36968700  | -0.20680800 | -0.07871600 |
| C          | 1.14717100  | 5.34495400  | 0.20926900  | C | 3.76240300  | 0.21372800  | -1.36940200 |
| H          | -1.01090000 | 5.19018400  | 0.10409300  | C | 4.64877700  | 1.29811900  | -1.44645300 |
| H          | 3.30561000  | 5.19575600  | 0.29662700  | H | 4.97943700  | 1.65169800  | -2.42528400 |
| H          | 1.14370500  | 6.43671900  | 0.25955900  | C | 5.12495000  | 1.92494300  | -0.29555700 |
| Ag         | -0.64377100 | -0.06471200 | -0.33211500 | H | 5.82438700  | 2.76025200  | -0.38114700 |
| <b>22c</b> |             |             |             | C | 4.71993500  | 1.48486400  | 0.96404100  |
| C          | -5.65774000 | 0.56852500  | -0.33173200 | H | 5.10572100  | 1.98364200  | 1.85563000  |
| O          | -6.79657600 | 0.96892800  | -0.19473500 | C | 3.83343100  | 0.40722600  | 1.10661100  |
| C          | -4.49855000 | 1.51662500  | -0.20204100 | C | 3.42884900  | -0.06361900 | 2.50129400  |
| C          | -3.21290300 | 1.04721700  | -0.25201600 | H | 2.68169500  | -0.86333600 | 2.38686800  |
| H          | -3.05357000 | -0.02481100 | -0.38726300 | C | 2.76089000  | 1.05867200  | 3.31514100  |
| C          | -4.67760000 | 3.00009000  | -0.00747800 | H | 3.45837600  | 1.88601400  | 3.52000200  |
| O          | -3.65981600 | 3.67493400  | 0.04587700  | H | 2.41650500  | 0.67257200  | 4.28749400  |
| C          | -5.38874800 | -0.89363000 | -0.64133000 | H | 1.88994300  | 1.47752500  | 2.78684800  |
| H          | -4.83801000 | -1.01052700 | -1.58818000 | C | 4.62668400  | -0.66785000 | 3.25768800  |
| H          | -4.79467200 | -1.37481200 | 0.15177300  | H | 5.41286700  | 0.08305900  | 3.43557000  |
| H          | -6.35604400 | -1.40494400 | -0.72168800 | H | 5.08296300  | -1.50014900 | 2.69909000  |
| C          | -6.03257800 | 3.63711000  | 0.11706900  | H | 4.30741800  | -1.05295100 | 4.23901800  |
| H          | -6.64550100 | 3.42678400  | -0.77199900 | C | 3.28279800  | -0.46462800 | -2.65043800 |
| H          | -6.58913200 | 3.20835100  | 0.96336500  | H | 2.58059400  | -1.26428400 | -2.37057200 |
| H          | -5.89677000 | 4.71828300  | 0.24758300  | C | 4.44960900  | -1.12963000 | -3.40415900 |
| C          | -2.03306200 | 1.81402500  | -0.14763700 | H | 4.07867300  | -1.66098200 | -4.29479400 |
| C          | -0.91196400 | 2.39017300  | -0.10329500 | H | 4.98017700  | -1.85774200 | -2.77083100 |
| C          | -0.09454700 | 3.57645500  | -0.04939300 | H | 5.18703300  | -0.38577000 | -3.74508500 |
| C          | 1.31425400  | 3.52148200  | -0.13445800 | C | 2.51271700  | 0.50970800  | -3.55974000 |
| C          | -0.73525900 | 4.83209300  | 0.08469000  | H | 1.65815200  | 0.96477000  | -3.03422000 |
| C          | 2.06370100  | 4.69434600  | -0.08834100 | H | 2.12520300  | -0.01857800 | -4.44517400 |
| H          | 1.81808900  | 2.55928500  | -0.24180900 | H | 3.15698900  | 1.32679200  | -3.92121200 |
| C          | 0.02763000  | 5.99570700  | 0.13196300  | C | -0.64136500 | -3.07077500 | 0.23244100  |
| H          | -1.82233000 | 4.87026500  | 0.14790100  | C | -1.27308000 | -3.44418300 | -0.97566300 |
| C          | 1.42392200  | 5.93195900  | 0.04555700  | C | -2.58185700 | -3.94037800 | -0.88650200 |
| H          | 3.15212300  | 4.64216400  | -0.15739700 | H | -3.10119100 | -4.25095200 | -1.79567400 |
| H          | -0.47080500 | 6.96213900  | 0.23597700  | C | -3.22726000 | -4.05874800 | 0.34434300  |
| H          | 2.01509900  | 6.85027200  | 0.08208700  | H | -4.24348700 | -4.45804100 | 0.38936900  |
| Au         | -0.03495300 | 0.36644400  | -0.04352800 | C | -2.57695800 | -3.68103700 | 1.51834100  |
| N          | 2.48692000  | -1.35005500 | 0.03648200  | H | -3.09296000 | -3.78644300 | 2.47504000  |
| N          | 0.72797400  | -2.60264100 | 0.17618500  | C | -1.26560400 | -3.18220700 | 1.49455700  |
|            |             |             |             | C | -0.57532300 | -2.80428000 | 2.80281700  |

|   |             |             |             |
|---|-------------|-------------|-------------|
| H | 0.43311000  | -2.43563600 | 2.56215900  |
| C | -1.31139900 | -1.66038400 | 3.52281400  |
| H | -2.32649800 | -1.95831700 | 3.83008300  |
| H | -1.40127100 | -0.77186600 | 2.87765300  |
| H | -0.76550300 | -1.36463400 | 4.43255400  |
| C | -0.40096200 | -4.02703500 | 3.72234700  |
| H | 0.15069900  | -3.74647300 | 4.63342300  |
| H | 0.15743800  | -4.83422600 | 3.22291100  |
| H | -1.37217200 | -4.44001900 | 4.03787600  |
| C | -0.58244400 | -3.35978000 | -2.33467500 |
| H | 0.38951400  | -2.86425900 | -2.19093700 |
| C | -0.29775600 | -4.76302600 | -2.90301600 |
| H | 0.30863200  | -5.36729000 | -2.21024600 |
| H | 0.24955600  | -4.68909900 | -3.85602700 |
| H | -1.23050600 | -5.31639100 | -3.09677700 |
| C | -1.37685900 | -2.50432200 | -3.33692100 |
| H | -0.82108100 | -2.40888100 | -4.28295300 |
| H | -1.55779900 | -1.48930900 | -2.94890000 |
| H | -2.35338500 | -2.95408200 | -3.57694400 |

**23a-ts**

|    |             |             |             |
|----|-------------|-------------|-------------|
| S  | 2.86587100  | -1.20542900 | -0.74515800 |
| O  | 3.97693400  | -1.76530900 | -1.49597000 |
| O  | 2.31811200  | 0.11114200  | -1.14881200 |
| C  | 3.49651700  | -0.90242700 | 0.99074700  |
| F  | 3.94164600  | -2.02346800 | 1.54407600  |
| F  | 4.47850900  | -0.00521500 | 0.97057600  |
| F  | 2.49676500  | -0.41727400 | 1.74643000  |
| O  | 1.73986000  | -2.20934200 | -0.47365200 |
| Cu | 0.00368300  | -1.44820500 | -0.30270700 |
| C  | 0.52252600  | 3.97998700  | -0.17888900 |
| O  | 0.20169900  | 5.15491600  | -0.12753800 |
| C  | -0.51417800 | 2.91198800  | -0.08604200 |
| C  | -0.23404200 | 1.57327900  | -0.18291600 |
| H  | 0.78320000  | 1.19790100  | -0.35335400 |
| C  | -1.95651000 | 3.15539100  | 0.11103800  |
| O  | -2.66781500 | 2.14180600  | 0.15798900  |
| C  | 1.97036900  | 3.55951700  | -0.32435300 |
| H  | 2.30272900  | 2.99665500  | 0.56336300  |
| H  | 2.12468800  | 2.89370100  | -1.18754500 |
| H  | 2.58637700  | 4.46089200  | -0.43270500 |
| C  | -2.56086800 | 4.51843100  | 0.24931500  |
| H  | -2.09280400 | 5.05738500  | 1.08665400  |
| H  | -2.33546600 | 5.12158100  | -0.64301600 |

|   |             |             |             |
|---|-------------|-------------|-------------|
| H | -3.64432100 | 4.42625700  | 0.39764200  |
| C | -1.25507400 | 0.61083900  | -0.09076500 |
| C | -1.73683500 | -0.58664400 | -0.09432500 |
| C | -2.99524100 | -1.29250500 | 0.01852900  |
| C | -3.02005700 | -2.70281400 | -0.06394800 |
| C | -4.21347500 | -0.59795800 | 0.20898300  |
| C | -4.22096900 | -3.40077700 | 0.03972100  |
| H | -2.08217100 | -3.24423500 | -0.21217500 |
| C | -5.40977800 | -1.30302000 | 0.31200000  |
| H | -4.19820700 | 0.48979700  | 0.27235400  |
| C | -5.41815800 | -2.70148100 | 0.22792100  |
| H | -4.22501200 | -4.49109700 | -0.02640000 |
| H | -6.34622500 | -0.75951700 | 0.45887500  |
| H | -6.36151100 | -3.24741900 | 0.30937400  |

**23b-ts**

|   |             |             |             |
|---|-------------|-------------|-------------|
| S | -3.47819900 | -0.73211400 | -0.69746600 |
| O | -4.44258900 | -1.09799900 | -1.72444500 |
| O | -2.27521300 | -1.66429700 | -0.57285600 |
| C | -4.34520700 | -1.00240300 | 0.93770200  |
| F | -5.40395000 | -0.20231300 | 1.03053100  |
| F | -4.74514800 | -2.26550300 | 1.05175100  |
| F | -3.51050200 | -0.72508900 | 1.94696800  |
| O | -3.00526400 | 0.67953900  | -0.62804900 |
| C | 4.52776800  | -2.78955500 | 0.06063300  |
| O | 5.73337100  | -2.92277200 | 0.17188500  |
| C | 3.91209100  | -1.43235000 | 0.07237500  |
| C | 2.56308600  | -1.21022500 | -0.04660900 |
| H | 1.86969900  | -2.04500000 | -0.15645000 |
| C | 4.67633200  | -0.17048900 | 0.21288100  |
| O | 3.99845400  | 0.86019500  | 0.20331700  |
| C | 3.62084200  | -3.99702100 | -0.09247400 |
| H | 2.88677600  | -4.05250700 | 0.72752200  |
| H | 3.05889000  | -3.95812100 | -1.03959300 |
| H | 4.24250700  | -4.90088400 | -0.08009800 |
| C | 6.16701500  | -0.11302400 | 0.35816300  |
| H | 6.48603000  | -0.68850500 | 1.24008000  |
| H | 6.65300000  | -0.60237900 | -0.49910100 |
| H | 6.48169900  | 0.93511400  | 0.44058200  |
| C | 2.00780700  | 0.08289300  | -0.03335300 |
| C | 1.12946800  | 1.01108400  | -0.07083100 |
| C | 0.92081500  | 2.43862700  | -0.01118400 |
| C | -0.37856500 | 2.99156700  | -0.10472300 |
| C | 2.03036200  | 3.30770600  | 0.14233000  |

|               |             |             |             |   |             |             |             |
|---------------|-------------|-------------|-------------|---|-------------|-------------|-------------|
| C             | -0.55969300 | 4.37199400  | -0.04621000 | H | 4.02688900  | -2.86766200 | 0.14568600  |
| H             | -1.24754000 | 2.33899600  | -0.22428200 | C | 1.86788100  | -3.42872000 | 0.21320600  |
| C             | 1.83487600  | 4.68390300  | 0.19912000  | H | 1.77042200  | -4.50698100 | 0.29979400  |
| H             | 3.03073000  | 2.88217600  | 0.21412400  | C | 3.38105500  | -0.17254800 | -0.06382700 |
| C             | 0.54301900  | 5.21924600  | 0.10514700  | C | 3.77416800  | 0.26187200  | -1.34981700 |
| H             | -1.56750600 | 4.78624500  | -0.12035100 | C | 4.64810100  | 1.35710700  | -1.41542900 |
| H             | 2.69472800  | 5.34763700  | 0.31716300  | H | 4.97834800  | 1.72189800  | -2.39033300 |
| H             | 0.39709100  | 6.30159400  | 0.14998600  | C | 5.11239300  | 1.98117400  | -0.25816200 |
| Ag            | -0.60358900 | -0.27837200 | -0.33553200 | H | 5.80210700  | 2.82543900  | -0.33491500 |
| <b>23c-ts</b> |             |             |             | C | 4.70791500  | 1.52693800  | 0.99657600  |
| C             | -5.69886000 | 0.50458600  | -0.28890700 | H | 5.08417000  | 2.02360900  | 1.89344500  |
| O             | -6.84049200 | 0.90811200  | -0.18570900 | C | 3.83352500  | 0.43798900  | 1.12765800  |
| C             | -4.54619200 | 1.45808300  | -0.17541300 | C | 3.42975100  | -0.04816300 | 2.51732700  |
| C             | -3.25061500 | 1.01579300  | -0.21582800 | H | 2.68966200  | -0.85311800 | 2.39427100  |
| H             | -3.05605300 | -0.05249600 | -0.33268200 | C | 2.75087000  | 1.06141700  | 3.33947700  |
| C             | -4.72018300 | 2.93958700  | -0.00816600 | H | 3.44105100  | 1.89283700  | 3.55242800  |
| O             | -3.69211500 | 3.60400700  | 0.03813100  | H | 2.40824700  | 0.66420700  | 4.30798200  |
| C             | -5.41768100 | -0.96574100 | -0.53926100 | H | 1.87724600  | 1.47720000  | 2.81320000  |
| H             | -4.86171000 | -1.11370000 | -1.47874700 | C | 4.63117400  | -0.64873900 | 3.27100700  |
| H             | -4.82094200 | -1.40910800 | 0.27355400  | H | 5.41068200  | 0.10725100  | 3.45671800  |
| H             | -6.37956000 | -1.48933400 | -0.60402000 | H | 5.09555800  | -1.47241600 | 2.70630800  |
| C             | -6.06727900 | 3.59192600  | 0.10004500  | H | 4.31331100  | -1.04486800 | 4.24841600  |
| H             | -6.67551800 | 3.37276800  | -0.79023200 | C | 3.30677000  | -0.41179800 | -2.63783300 |
| H             | -6.63208600 | 3.17680900  | 0.94782300  | H | 2.61782100  | -1.22569700 | -2.36643700 |
| H             | -5.92565900 | 4.67376000  | 0.21737600  | C | 4.48440200  | -1.05044600 | -3.39745000 |
| C             | -2.10363100 | 1.82840600  | -0.12325900 | H | 4.12206100  | -1.57975900 | -4.29284300 |
| C             | -0.95246300 | 2.35853900  | -0.08984700 | H | 5.02681900  | -1.77551500 | -2.77065800 |
| C             | -0.15658600 | 3.56318300  | -0.04551500 | H | 5.20966500  | -0.29184200 | -3.73188200 |
| C             | 1.25339700  | 3.52595600  | -0.12919300 | C | 2.52051900  | 0.55857400  | -3.53740400 |
| C             | -0.80985400 | 4.81368700  | 0.07769000  | H | 1.65596800  | 0.98992000  | -3.00820700 |
| C             | 1.99006800  | 4.70718000  | -0.09242400 | H | 2.14541100  | 0.03391800  | -4.43034400 |
| H             | 1.76856500  | 2.56886900  | -0.22865800 | H | 3.14983300  | 1.39243900  | -3.88674000 |
| C             | -0.06077400 | 5.98638200  | 0.11620700  | C | -0.60437300 | -3.07581000 | 0.20132600  |
| H             | -1.89691000 | 4.84243900  | 0.13997600  | C | -1.22662400 | -3.43713400 | -1.01536900 |
| C             | 1.33633300  | 5.93841400  | 0.03118300  | C | -2.53067900 | -3.94792700 | -0.94038100 |
| H             | 3.07905900  | 4.66641500  | -0.16056400 | H | -3.04237900 | -4.24990200 | -1.85676000 |
| H             | -0.57042600 | 6.94777600  | 0.21220600  | C | -3.18073900 | -4.09196000 | 0.28527400  |
| H             | 1.91677800  | 6.86382700  | 0.06075200  | H | -4.19293200 | -4.50246900 | 0.31914500  |
| Au            | -0.02383100 | 0.37324400  | -0.03778000 | C | -2.53996700 | -3.72563200 | 1.46811200  |
| N             | 2.50876400  | -1.32493100 | 0.03935400  | H | -3.05923300 | -3.85101500 | 2.42070100  |
| N             | 0.76065000  | -2.59443000 | 0.15886400  | C | -1.23379600 | -3.21286900 | 1.45837000  |
| C             | 1.15117300  | -1.29811400 | 0.05270700  | C | -0.55380700 | -2.84852600 | 2.77584200  |
| C             | 2.96709200  | -2.63001900 | 0.13822700  | H | 0.44974900  | -2.46072400 | 2.54562100  |
|               |             |             |             | C | -1.30870000 | -1.72861100 | 3.51374500  |

|            |             |             |             |            |             |             |             |
|------------|-------------|-------------|-------------|------------|-------------|-------------|-------------|
| H          | -2.32120500 | -2.04576800 | 3.81016100  | C          | 0.87779500  | 0.79937800  | -0.12258100 |
| H          | -1.40681200 | -0.82916900 | 2.88522600  | C          | 0.60750400  | 2.22610000  | -0.06845500 |
| H          | -0.77125100 | -1.44313900 | 4.43176400  | C          | -0.74610200 | 2.63749400  | -0.23224800 |
| C          | -0.36494900 | -4.08532500 | 3.67345600  | C          | 1.58262500  | 3.24389800  | 0.13866400  |
| H          | 0.17850800  | -3.81360800 | 4.59211600  | C          | -1.10288200 | 3.98260800  | -0.19400600 |
| H          | 0.20769800  | -4.87458900 | 3.16165900  | H          | -1.52380400 | 1.88578300  | -0.39739200 |
| H          | -1.33118900 | -4.51878900 | 3.97654700  | C          | 1.21825800  | 4.58398200  | 0.18016900  |
| C          | -0.53035000 | -3.32489900 | -2.36951200 | H          | 2.62735200  | 2.97347300  | 0.27039300  |
| H          | 0.43613300  | -2.82272200 | -2.21307300 | C          | -0.12331300 | 4.95853600  | 0.01320000  |
| C          | -0.22994600 | -4.71615500 | -2.95880700 | H          | -2.14886100 | 4.26751600  | -0.32638000 |
| H          | 0.37887900  | -5.32576800 | -2.27288500 | H          | 1.98130600  | 5.34890000  | 0.34355000  |
| H          | 0.32111100  | -4.62179600 | -3.90784400 | H          | -0.40167000 | 6.01531900  | 0.04591500  |
| H          | -1.15655900 | -5.27491300 | -3.16594600 |            |             |             |             |
| C          | -1.32790500 | -2.46066100 | -3.36167500 | <b>24b</b> |             |             |             |
| H          | -0.76909000 | -2.34597000 | -4.30378400 | S          | -3.56716900 | -0.67462800 | -0.70195200 |
| H          | -1.51877600 | -1.45335500 | -2.95864900 | O          | -4.54890200 | -1.15037100 | -1.66787500 |
| H          | -2.29961800 | -2.91481300 | -3.61272600 | O          | -2.31151700 | -1.54826100 | -0.61853900 |
|            |             |             |             | C          | -4.32711600 | -0.98279000 | 0.97960100  |
| <b>24a</b> |             |             |             | F          | -5.44217700 | -0.26722100 | 1.11637500  |
| S          | -3.35400000 | -0.99899400 | -0.76727700 | F          | -4.62142900 | -2.27123200 | 1.13846500  |
| O          | -4.24305400 | -1.82989000 | -1.56526100 | F          | -3.47111500 | -0.62133500 | 1.94546900  |
| O          | -1.99238800 | -1.65629100 | -0.49302200 | O          | -3.21666900 | 0.76219300  | -0.68408700 |
| C          | -4.07714100 | -0.97807900 | 0.95819800  | C          | 4.76800700  | -2.67993500 | 0.07334100  |
| F          | -5.26841100 | -0.38456400 | 0.94855800  | O          | 5.97614500  | -2.70126100 | 0.21002700  |
| F          | -4.21501800 | -2.21310600 | 1.43355200  | C          | 4.01312100  | -1.39221600 | 0.07485800  |
| F          | -3.26808100 | -0.29350500 | 1.77929700  | C          | 2.62493100  | -1.19270600 | -0.06847500 |
| O          | -3.19093300 | 0.42749500  | -1.11117900 | H          | 1.85634400  | -1.95009300 | -0.20598800 |
| Cu         | -0.56561900 | -0.41094200 | -0.32783400 | C          | 4.56000600  | -0.10852200 | 0.22385600  |
| C          | 4.73354400  | -2.48967600 | 0.06967500  | O          | 3.59996200  | 0.81008300  | 0.17713600  |
| O          | 5.94323100  | -2.43756200 | 0.18568600  | C          | 3.96152500  | -3.94767100 | -0.10571500 |
| C          | 3.90259500  | -1.25113700 | 0.05817300  | H          | 3.21116200  | -4.05053800 | 0.69538200  |
| C          | 2.50045500  | -1.13787200 | -0.06553600 | H          | 3.41526700  | -3.93149900 | -1.06319000 |
| H          | 1.77635000  | -1.94276100 | -0.17360200 | H          | 4.63932300  | -4.81010800 | -0.08548600 |
| C          | 4.37329000  | 0.06473400  | 0.16705400  | C          | 5.95221900  | 0.36173100  | 0.41531900  |
| O          | 3.35698900  | 0.92339700  | 0.11705000  | H          | 6.03614800  | 0.91704100  | 1.36458000  |
| C          | 4.00207700  | -3.80742000 | -0.07001500 | H          | 6.63227800  | -0.49649900 | 0.42445300  |
| H          | 3.27411500  | -3.93911300 | 0.74737300  | H          | 6.23180900  | 1.05632000  | -0.39430600 |
| H          | 3.43811500  | -3.84307500 | -1.01662000 | C          | 2.35815700  | 0.17917700  | -0.00609300 |
| H          | 4.73101300  | -4.62704300 | -0.04680500 | C          | 1.12503700  | 0.84517500  | -0.09968800 |
| C          | 5.73724300  | 0.62466000  | 0.31938000  | C          | 0.94408300  | 2.28335600  | -0.02480400 |
| H          | 5.81095200  | 1.19083700  | 1.26320000  | C          | -0.38338000 | 2.79137500  | -0.13132600 |
| H          | 6.47051600  | -0.18864500 | 0.31774700  | C          | 1.99459900  | 3.23344800  | 0.14581200  |
| H          | 5.95172500  | 1.32947700  | -0.50101900 | C          | -0.64473800 | 4.15729100  | -0.07102800 |
| C          | 2.15616300  | 0.21511700  | -0.02860500 | H          | -1.22027900 | 2.09941800  | -0.26429000 |

|            |             |             |             |   |             |             |             |
|------------|-------------|-------------|-------------|---|-------------|-------------|-------------|
| C          | 1.72621100  | 4.59467400  | 0.20410700  | C | -3.43889000 | 0.00917500  | -0.30897500 |
| H          | 3.02316500  | 2.89340200  | 0.23194000  | C | -3.95278800 | 0.68050900  | 0.82279700  |
| C          | 0.40772100  | 5.06213900  | 0.09618000  | C | -4.73835500 | 1.81927600  | 0.59185200  |
| H          | -1.67362600 | 4.51305600  | -0.15655600 | H | -5.15732200 | 2.36277500  | 1.44145100  |
| H          | 2.54709200  | 5.30391400  | 0.33445400  | C | -5.00082000 | 2.26553100  | -0.70261600 |
| H          | 0.20500700  | 6.13546100  | 0.14269600  | H | -5.62164100 | 3.15144700  | -0.85796200 |
| Ag         | -0.56363700 | -0.36285000 | -0.36519500 | C | -4.48308600 | 1.57890600  | -1.80015600 |
| <b>24c</b> |             |             |             | H | -4.70372400 | 1.93522000  | -2.80875100 |
| C          | 5.89352000  | 0.12082700  | -0.43186900 | C | -3.69304800 | 0.43183900  | -1.63275300 |
| O          | 7.00036400  | 0.61335000  | -0.52444400 | C | -3.16599600 | -0.30888500 | -2.85953800 |
| C          | 4.69920000  | 1.00514300  | -0.30137300 | H | -2.54810600 | -1.14921500 | -2.51003300 |
| C          | 3.34089800  | 0.67611600  | -0.17550500 | C | -2.25781100 | 0.58631500  | -3.72095400 |
| H          | 2.89839500  | -0.31775700 | -0.14919000 | H | -2.80928900 | 1.44191400  | -4.14214300 |
| C          | 4.75162500  | 2.41305800  | -0.30044800 | H | -1.84453800 | 0.01339300  | -4.56622300 |
| O          | 3.53209100  | 2.91592800  | -0.16986300 | H | -1.41447000 | 0.98350900  | -3.13410700 |
| C          | 5.66244300  | -1.37214300 | -0.44476500 | C | -4.31621700 | -0.90742100 | -3.69029200 |
| H          | 5.15123900  | -1.69736000 | 0.47605900  | H | -4.97293700 | -0.12222100 | -4.09737100 |
| H          | 5.01599100  | -1.65651000 | -1.29138700 | H | -4.94207300 | -1.58447000 | -3.08791700 |
| H          | 6.62820900  | -1.88541400 | -0.53205900 | H | -3.91772800 | -1.48134100 | -4.54196800 |
| C          | 5.88811400  | 3.35202900  | -0.42133200 | C | -3.70390800 | 0.20924000  | 2.25329800  |
| H          | 6.56551900  | 3.23484700  | 0.44054100  | H | -3.02912000 | -0.65872100 | 2.21244600  |
| H          | 6.49421000  | 3.10203200  | -1.30514900 | C | -5.00878700 | -0.26166900 | 2.92225700  |
| H          | 5.52963800  | 4.38787800  | -0.47804500 | H | -4.80583500 | -0.64779800 | 3.93380600  |
| C          | 2.60458500  | 1.86954100  | -0.08264200 | H | -5.49489600 | -1.06345800 | 2.34441700  |
| C          | 1.22573700  | 2.08728000  | 0.02864800  | H | -5.73294800 | 0.56281600  | 3.02034300  |
| C          | 0.65266200  | 3.41799800  | 0.18381800  | C | -2.99812100 | 1.28547300  | 3.09680100  |
| C          | -0.69273000 | 3.63073800  | -0.22144800 | H | -2.05254400 | 1.60471500  | 2.63116700  |
| C          | 1.34840900  | 4.52013900  | 0.75369700  | H | -2.76934600 | 0.89532500  | 4.10132700  |
| C          | -1.29080800 | 4.88201700  | -0.11689000 | H | -3.62807900 | 2.17961000  | 3.22799900  |
| H          | -1.25594600 | 2.79558600  | -0.64178500 | C | 0.36067700  | -3.05178100 | 0.37756700  |
| C          | 0.73177000  | 5.75869900  | 0.89362900  | C | 0.87886500  | -3.15322000 | 1.68761800  |
| H          | 2.36520300  | 4.39200600  | 1.11851600  | C | 2.15966000  | -3.70805400 | 1.83072200  |
| C          | -0.58195800 | 5.94980100  | 0.44590200  | H | 2.59141400  | -3.80929600 | 2.82882400  |
| H          | -2.31819600 | 5.02265100  | -0.45930600 | C | 2.88457000  | -4.14767900 | 0.72385400  |
| H          | 1.27688500  | 6.58549900  | 1.35462100  | H | 3.87382100  | -4.59131100 | 0.86204500  |
| H          | -1.05632400 | 6.92908100  | 0.54771600  | C | 2.34510100  | -4.03689700 | -0.55772400 |
| N          | -2.63955700 | -1.18064100 | -0.10373100 | H | 2.91956400  | -4.39594400 | -1.41455100 |
| N          | -0.97261400 | -2.51953700 | 0.19825900  | C | 1.07084600  | -3.48747500 | -0.76399300 |
| C          | -1.28583600 | -1.20646000 | 0.02867900  | C | 0.49711400  | -3.40848500 | -2.17652800 |
| C          | -3.16667700 | -2.46017600 | -0.01753500 | H | -0.45760400 | -2.86451300 | -2.12358100 |
| H          | -4.23276200 | -2.65108000 | -0.09934300 | C | 1.40904000  | -2.61553400 | -3.12891200 |
| C          | -2.11626100 | -3.30457200 | 0.17396800  | H | 2.38016500  | -3.11430400 | -3.27717900 |
| H          | -2.07795500 | -4.38329400 | 0.29487800  | H | 1.60197600  | -1.59982200 | -2.74899400 |
|            |             |             |             | H | 0.93708600  | -2.52060900 | -4.11959400 |

|              |             |             |             |    |             |             |             |
|--------------|-------------|-------------|-------------|----|-------------|-------------|-------------|
| C            | 0.19293000  | -4.81147100 | -2.73458400 | H  | -2.00404900 | 4.23002800  | 5.74447500  |
| H            | -0.27047500 | -4.73813600 | -3.73122700 | Pd | 0.86862500  | -0.01218600 | -0.07757200 |
| H            | -0.49671400 | -5.36820100 | -2.08095100 | P  | 1.40957200  | 2.20443800  | -1.03528200 |
| H            | 1.11051900  | -5.41276400 | -2.83733500 | P  | 0.70539600  | -2.25706700 | -0.99001500 |
| C            | 0.10675800  | -2.70289600 | 2.92504000  | C  | 1.35589300  | 3.74812900  | -0.02161700 |
| H            | -0.86571200 | -2.30965500 | 2.59402200  | C  | 0.22052600  | 3.97571700  | 0.77416000  |
| C            | -0.18151500 | -3.88191100 | 3.87241800  | C  | 2.39217100  | 4.69637100  | -0.01282200 |
| H            | -0.72784300 | -4.68944600 | 3.36036300  | C  | 0.11525500  | 5.13065100  | 1.55201300  |
| H            | -0.79233300 | -3.54731000 | 4.72576200  | H  | -0.58676100 | 3.24145700  | 0.79766300  |
| H            | 0.74648100  | -4.31396800 | 4.27972800  | C  | 2.28772500  | 5.84995800  | 0.77088500  |
| C            | 0.82729700  | -1.55658500 | 3.65701000  | H  | 3.28742400  | 4.53598900  | -0.61633300 |
| H            | 0.22573300  | -1.20976300 | 4.51218500  | C  | 1.15015000  | 6.07106500  | 1.55210000  |
| H            | 0.99335400  | -0.69709200 | 2.98816700  | H  | -0.77014700 | 5.28150100  | 2.17383600  |
| H            | 1.80584600  | -1.87564100 | 4.05038900  | H  | 3.10337500  | 6.57780900  | 0.77092500  |
| Au           | -0.01061400 | 0.42335600  | 0.00645100  | H  | 1.07397900  | 6.97063700  | 2.16832000  |
| <b>25-ts</b> |             |             |             | C  | 3.16298800  | 2.13312000  | -1.61982700 |
| C            | 3.42593800  | -2.29238300 | 4.44679100  | C  | 3.55843900  | 2.45831800  | -2.92785800 |
| O            | 4.64507300  | -2.41437900 | 4.55045900  | C  | 4.13278600  | 1.69779500  | -0.69551500 |
| C            | 2.78888800  | -1.31566000 | 3.56993300  | C  | 4.90211200  | 2.35669100  | -3.30440000 |
| C            | 1.37085500  | -1.20467500 | 3.40069600  | H  | 2.81985500  | 2.79315000  | -3.65852500 |
| H            | 0.70067200  | -1.87941900 | 3.94512600  | C  | 5.47421700  | 1.60840100  | -1.07636900 |
| C            | 3.48779600  | -0.34417800 | 2.78838900  | H  | 3.82993200  | 1.42211800  | 0.32047500  |
| O            | 2.80212100  | 0.46631400  | 2.10573800  | C  | 5.86288600  | 1.93574100  | -2.38053400 |
| C            | 2.52551300  | -3.19790300 | 5.29272500  | H  | 5.19722700  | 2.61236800  | -4.32551600 |
| H            | 1.88538800  | -2.61036200 | 5.97109300  | H  | 6.21837100  | 1.27315600  | -0.34917200 |
| H            | 1.85909200  | -3.81353800 | 4.66677500  | H  | 6.91277400  | 1.86168100  | -2.67620800 |
| H            | 3.16898000  | -3.85943600 | 5.88710500  | C  | 0.46531300  | 2.66822400  | -2.55814700 |
| C            | 4.99535600  | -0.25459300 | 2.74165900  | C  | 0.19503800  | 4.00021600  | -2.91498300 |
| H            | 5.42038900  | -0.27508700 | 3.75410200  | C  | 0.01112400  | 1.63571600  | -3.39631000 |
| H            | 5.41567300  | -1.13685400 | 2.23291700  | C  | -0.50646300 | 4.28988700  | -4.08971800 |
| H            | 5.29325900  | 0.66113600  | 2.21193600  | H  | 0.53242000  | 4.81746900  | -2.27439200 |
| C            | 0.75327300  | -0.35735400 | 2.56464300  | C  | -0.67904000 | 1.92721300  | -4.57597100 |
| C            | -0.30598100 | 0.45406200  | 2.25303900  | H  | 0.19058100  | 0.59520500  | -3.11546300 |
| C            | -0.79561100 | 1.51472000  | 3.18409400  | C  | -0.94113700 | 3.25603100  | -4.92461700 |
| C            | -2.10478000 | 2.03258300  | 3.12712000  | H  | -0.71206700 | 5.33071700  | -4.35330600 |
| C            | 0.07190500  | 2.01387900  | 4.17693800  | H  | -1.02250900 | 1.10995500  | -5.21504500 |
| C            | -2.53325000 | 3.00002800  | 4.04133100  | H  | -1.48859000 | 3.48558500  | -5.84253800 |
| H            | -2.80904100 | 1.67064000  | 2.37785800  | C  | 0.01857900  | -3.64856100 | 0.01777500  |
| C            | -0.36054800 | 2.97626400  | 5.08889600  | C  | 0.63177500  | -3.93214500 | 1.25281200  |
| H            | 1.09924600  | 1.64744400  | 4.21145900  | C  | -1.09079800 | -4.41229800 | -0.38050800 |
| C            | -1.66642800 | 3.47598000  | 5.02887800  | C  | 0.15348600  | -4.96746900 | 2.05820100  |
| H            | -3.55856500 | 3.37555900  | 3.98345300  | H  | 1.49275300  | -3.34631900 | 1.58358800  |
| H            | 0.33342300  | 3.34731200  | 5.84793500  | C  | -1.57603800 | -5.43894100 | 0.43770200  |
|              |             |             |             | H  | -1.58052400 | -4.21348200 | -1.33511400 |

|    |             |             |             |           |             |             |             |
|----|-------------|-------------|-------------|-----------|-------------|-------------|-------------|
| C  | -0.95495700 | -5.72142500 | 1.65625500  | C         | -0.87350600 | 0.29658100  | 0.93126300  |
| H  | 0.64895500  | -5.18565200 | 3.00761900  |           |             |             |             |
| H  | -2.44070100 | -6.02358300 | 0.11290500  | <b>26</b> |             |             |             |
| H  | -1.33074300 | -6.52729100 | 2.29178700  | C         | 4.54039700  | -4.46137700 | 0.98461100  |
| C  | 2.38364300  | -2.87707000 | -1.46211400 | O         | 5.60649000  | -4.26346600 | 0.42432400  |
| C  | 3.35760200  | -1.93864500 | -1.84397100 | C         | 3.50412200  | -3.41375800 | 1.12413100  |
| C  | 2.72027900  | -4.24225200 | -1.46371100 | C         | 2.20616300  | -3.53056100 | 1.74100200  |
| C  | 4.63526400  | -2.35401100 | -2.22876100 | H         | 1.77088800  | -4.41430200 | 2.19949200  |
| H  | 3.12316600  | -0.87115100 | -1.83453500 | C         | 3.59591700  | -2.10701400 | 0.67969600  |
| C  | 4.00031400  | -4.65525300 | -1.84394000 | O         | 2.45386200  | -1.44614800 | 0.99197500  |
| H  | 1.98350100  | -4.98948800 | -1.16237300 | C         | 4.22009400  | -5.82315000 | 1.57884200  |
| C  | 4.95975600  | -3.71338800 | -2.22834100 | H         | 4.02425200  | -5.74068200 | 2.66049200  |
| H  | 5.37856300  | -1.60707800 | -2.51719800 | H         | 3.31213000  | -6.24708900 | 1.11916600  |
| H  | 4.24890600  | -5.71965600 | -1.83609700 | H         | 5.06822000  | -6.49850100 | 1.40801000  |
| H  | 5.96150800  | -4.03906700 | -2.52009800 | C         | 4.66624900  | -1.34523400 | -0.01221000 |
| C  | -0.26080300 | -2.36938400 | -2.56652500 | H         | 5.47954600  | -2.03302600 | -0.27032400 |
| C  | 0.19325100  | -3.07259200 | -3.69486400 | H         | 4.28276200  | -0.85938000 | -0.92343500 |
| C  | -1.50559100 | -1.71669400 | -2.63012700 | H         | 5.06811600  | -0.55200100 | 0.64228400  |
| C  | -0.58463900 | -3.12781800 | -4.85597200 | C         | 1.59451700  | -2.30854600 | 1.64153700  |
| H  | 1.15892600  | -3.58052000 | -3.67195400 | C         | 0.28704300  | -1.83106600 | 2.09332500  |
| C  | -2.28751700 | -1.78604400 | -3.78632900 | C         | -0.21679500 | -2.31299400 | 3.41605100  |
| H  | -1.86273300 | -1.14429800 | -1.77202300 | C         | -1.59279100 | -2.39903200 | 3.71649900  |
| C  | -1.82797000 | -2.49092200 | -4.90388800 | C         | 0.68733400  | -2.65451700 | 4.44742700  |
| H  | -0.21553500 | -3.67631400 | -5.72651800 | C         | -2.04028500 | -2.81106100 | 4.97405400  |
| H  | -3.25634700 | -1.28096600 | -3.81297800 | H         | -2.33304100 | -2.14511300 | 2.95943500  |
| H  | -2.43649700 | -2.54138200 | -5.81052600 | C         | 0.23854500  | -3.06646800 | 5.70277000  |
| C  | -6.05326300 | -0.12748600 | 0.11664800  | H         | 1.76032900  | -2.58119000 | 4.26545700  |
| C  | -5.29483000 | -0.98309900 | 0.91565600  | C         | -1.13004800 | -3.15171300 | 5.97745100  |
| C  | -3.90889100 | -0.81792400 | 1.02227700  | H         | -3.11528300 | -2.87000800 | 5.16502100  |
| C  | -3.29310500 | 0.23256700  | 0.28809400  | H         | 0.96952300  | -3.31593300 | 6.47705300  |
| C  | -4.06631500 | 1.09812300  | -0.53092800 | H         | -1.48104500 | -3.47764200 | 6.95978800  |
| C  | -5.44994800 | 0.90899000  | -0.59738400 | Pd        | 0.27313600  | 0.36581600  | -0.10245600 |
| H  | -5.78305800 | -1.78617900 | 1.47056700  | P         | 0.99993200  | 2.57031400  | 0.81361100  |
| H  | -6.05706400 | 1.57351300  | -1.21464600 | P         | 0.50938100  | -0.60746800 | -2.27774800 |
| Br | -7.94089600 | -0.37781700 | -0.00241500 | C         | 1.27902500  | 2.62922700  | 2.64560700  |
| C  | -3.40131700 | 2.21111100  | -1.29543700 | C         | 0.47688900  | 1.80890700  | 3.45907300  |
| H  | -2.58432200 | 1.83116200  | -1.92861100 | C         | 2.25027300  | 3.44556600  | 3.25182100  |
| H  | -4.12214700 | 2.74066000  | -1.93413600 | C         | 0.63725900  | 1.81369200  | 4.84768100  |
| H  | -2.94521300 | 2.94857300  | -0.61413100 | H         | -0.27472300 | 1.16024800  | 3.00507500  |
| C  | -3.10052100 | -1.73460700 | 1.90106700  | C         | 2.40990900  | 3.44496700  | 4.64090900  |
| H  | -3.72818100 | -2.53737100 | 2.31191800  | H         | 2.89106100  | 4.08285400  | 2.63912300  |
| H  | -2.26961100 | -2.20283200 | 1.34961200  | C         | 1.60413800  | 2.62996900  | 5.44170500  |
| H  | -2.65056700 | -1.18826700 | 2.74561700  | H         | 0.01089300  | 1.16354300  | 5.46344600  |
| N  | -1.92455900 | 0.41467600  | 0.30253700  | H         | 3.17069100  | 4.08352400  | 5.09784500  |

|   |             |             |             |              |             |             |             |
|---|-------------|-------------|-------------|--------------|-------------|-------------|-------------|
| H | 1.73458200  | 2.62660000  | 6.52707900  | H            | 5.53462900  | 0.31114800  | -4.95045500 |
| C | 2.57614700  | 3.29658300  | 0.16129100  | C            | -0.68748300 | 0.28530900  | -3.38279400 |
| C | 2.65230100  | 4.54374000  | -0.47902000 | C            | -0.36419700 | 0.71869500  | -4.67941100 |
| C | 3.74885600  | 2.52688600  | 0.28077500  | C            | -1.97928200 | 0.54056000  | -2.88617100 |
| C | 3.87297000  | 5.01302500  | -0.97911500 | C            | -1.31233100 | 1.38797200  | -5.46077600 |
| H | 1.75707200  | 5.15852800  | -0.58856200 | H            | 0.63236700  | 0.53495800  | -5.08526600 |
| C | 4.96778300  | 3.00294400  | -0.20430100 | C            | -2.92932700 | 1.19618500  | -3.67351200 |
| H | 3.70493300  | 1.54501500  | 0.75918600  | H            | -2.24363200 | 0.22388500  | -1.87369200 |
| C | 5.03405600  | 4.24929600  | -0.83913100 | C            | -2.59643400 | 1.62533700  | -4.96291800 |
| H | 3.91325600  | 5.98650500  | -1.47502300 | H            | -1.04359400 | 1.72259000  | -6.46625500 |
| H | 5.86930700  | 2.39472200  | -0.09348900 | H            | -3.93011700 | 1.37634700  | -3.27299200 |
| H | 5.98747300  | 4.62106100  | -1.22331500 | H            | -3.33603600 | 2.14603200  | -5.57676600 |
| C | -0.22826300 | 3.92732300  | 0.51771500  | C            | -5.50837200 | -0.57535400 | 0.10311400  |
| C | -0.43107300 | 4.99148500  | 1.41253400  | C            | -4.64761300 | -1.64455200 | -0.13585400 |
| C | -0.99558300 | 3.87666500  | -0.65970900 | C            | -3.31349900 | -1.60125200 | 0.29203200  |
| C | -1.37351600 | 5.98514300  | 1.13045300  | C            | -2.84687500 | -0.43596900 | 0.96869100  |
| H | 0.14564900  | 5.04446300  | 2.33812700  | C            | -3.74198700 | 0.64303900  | 1.22341400  |
| C | -1.92953100 | 4.87654300  | -0.94559800 | C            | -5.06534100 | 0.55970800  | 0.78312000  |
| H | -0.87071700 | 3.03963300  | -1.35225400 | H            | -5.01190700 | -2.53002900 | -0.65971300 |
| C | -2.12193900 | 5.93254800  | -0.04959500 | H            | -5.75276100 | 1.38517000  | 0.97557800  |
| H | -1.52358600 | 6.80458000  | 1.83836900  | Br           | -7.31597400 | -0.66534900 | -0.50323100 |
| H | -2.51576800 | 4.82030400  | -1.86628000 | C            | -3.27419000 | 1.86241400  | 1.97097100  |
| H | -2.85884000 | 6.71014100  | -0.26705900 | H            | -2.44438800 | 2.36108300  | 1.44753600  |
| C | 0.14256800  | -2.39110900 | -2.63824400 | H            | -4.09155900 | 2.58752000  | 2.09170000  |
| C | 0.81137100  | -3.37190900 | -1.88257200 | H            | -2.89624800 | 1.59411200  | 2.97003900  |
| C | -0.78347200 | -2.80504800 | -3.60984700 | C            | -2.43010700 | -2.79116800 | 0.03245600  |
| C | 0.56968500  | -4.72915500 | -2.10400300 | H            | -2.94131800 | -3.52217500 | -0.60932700 |
| H | 1.52509100  | -3.08044400 | -1.10932300 | H            | -1.48946600 | -2.50620700 | -0.45905500 |
| C | -1.03250600 | -4.16573500 | -3.82190100 | H            | -2.14716200 | -3.29989900 | 0.96762700  |
| H | -1.31744000 | -2.06509000 | -4.20851000 | N            | -1.54476700 | -0.26716300 | 1.43097800  |
| C | -0.35591700 | -5.13156500 | -3.07289800 | C            | -0.47850200 | -0.96311200 | 1.36662700  |
| H | 1.10218300  | -5.47488200 | -1.50843800 |              |             |             |             |
| H | -1.75845000 | -4.46895000 | -4.58103400 | <b>27-ts</b> |             |             |             |
| H | -0.55026800 | -6.19406000 | -3.24049700 | C            | -2.67214300 | 4.71745000  | 1.10786700  |
| C | 2.12813500  | -0.37106600 | -3.15633100 | O            | -2.75463200 | 5.61039100  | 1.94271500  |
| C | 2.85191600  | 0.80535200  | -2.89715900 | C            | -1.37849600 | 4.19103500  | 0.65637700  |
| C | 2.65514800  | -1.30149100 | -4.06835700 | C            | -1.16774000 | 3.14781900  | -0.27359000 |
| C | 4.06406600  | 1.05519000  | -3.54548600 | H            | -1.97189800 | 2.64492300  | -0.80931300 |
| H | 2.46731100  | 1.52608700  | -2.17224700 | C            | -0.10668700 | 4.66986100  | 1.08650500  |
| C | 3.87537400  | -1.05644100 | -4.70699000 | O            | 0.88921300  | 4.10024400  | 0.53175100  |
| H | 2.11514400  | -2.22548700 | -4.28241400 | C            | -3.93159800 | 4.11401500  | 0.50130400  |
| C | 4.58087800  | 0.12254200  | -4.45074900 | H            | -3.93685900 | 4.22156400  | -0.59548200 |
| H | 4.60956600  | 1.97664700  | -3.32819700 | H            | -4.00143400 | 3.03598100  | 0.72016000  |
| H | 4.27486000  | -1.79355100 | -5.40850800 | H            | -4.80568000 | 4.62708400  | 0.92275600  |



|    |             |             |             |           |             |             |             |
|----|-------------|-------------|-------------|-----------|-------------|-------------|-------------|
| C  | 0.13560200  | 5.74601000  | 2.10016500  | C         | 0.30168200  | -1.99820400 | 2.74484900  |
| H  | -0.35787300 | 6.67922500  | 1.78933100  | C         | 1.29880700  | -4.60009900 | 2.61699700  |
| H  | -0.32745600 | 5.47892900  | 3.06215200  | H         | 2.47735700  | -3.91586800 | 0.94581100  |
| H  | 1.21539700  | 5.90404800  | 2.22342400  | C         | -0.13427500 | -2.95745800 | 3.66067700  |
| C  | 0.14683500  | 2.81161400  | -0.54594100 | H         | -0.10392000 | -0.98456300 | 2.79377100  |
| C  | 0.95642000  | 1.98435500  | -1.22732300 | C         | 0.36132200  | -4.26492100 | 3.59735000  |
| C  | 2.23443700  | 2.24265600  | -1.87814100 | H         | 1.69457800  | -5.61789400 | 2.56204600  |
| C  | 2.88266900  | 1.21862000  | -2.60543600 | H         | -0.87072600 | -2.68390600 | 4.42035200  |
| C  | 2.84310300  | 3.52204200  | -1.85725800 | H         | 0.01696800  | -5.01887800 | 4.30990800  |
| C  | 4.08726400  | 1.45300400  | -3.26683900 | C         | -3.24503600 | -0.02330900 | -1.60994900 |
| H  | 2.41481000  | 0.23380200  | -2.64745000 | C         | -4.63915300 | -0.06976100 | -1.43629600 |
| C  | 4.04044800  | 3.75656500  | -2.53214900 | C         | -2.72186100 | 0.69948900  | -2.69648200 |
| H  | 2.36383500  | 4.32489200  | -1.29649000 | C         | -5.48813900 | 0.58876700  | -2.33053600 |
| C  | 4.67145100  | 2.72452400  | -3.23650400 | H         | -5.06904900 | -0.61880500 | -0.59617400 |
| H  | 4.56790000  | 0.64104800  | -3.81868400 | C         | -3.57323400 | 1.35028000  | -3.59552500 |
| H  | 4.48945100  | 4.75336300  | -2.50519700 | H         | -1.63692400 | 0.76285700  | -2.82724300 |
| H  | 5.61114800  | 2.91182900  | -3.76309300 | C         | -4.95818100 | 1.29831000  | -3.41316100 |
| Pd | 0.06952200  | 0.28367900  | -0.47257100 | H         | -6.56996900 | 0.54803800  | -2.17865100 |
| P  | 1.77204700  | -0.96474700 | 0.60002400  | H         | -3.14918900 | 1.90699800  | -4.43516900 |
| P  | -2.05169400 | -0.88008500 | -0.46735100 | H         | -5.62402500 | 1.81423800  | -4.10983200 |
| C  | 2.86434900  | -1.84684000 | -0.60436300 | C         | -3.00555500 | -0.95875800 | 1.11952900  |
| C  | 2.24694400  | -2.68638500 | -1.55243200 | C         | -3.88414900 | -2.00149700 | 1.45787100  |
| C  | 4.25435300  | -1.66460500 | -0.66799000 | C         | -2.83853900 | 0.10514000  | 2.02447300  |
| C  | 3.00599000  | -3.34508800 | -2.52094100 | C         | -4.58194400 | -1.97667500 | 2.67001500  |
| H  | 1.16248400  | -2.82442800 | -1.53385500 | H         | -4.02509100 | -2.84186100 | 0.77509200  |
| C  | 5.01161600  | -2.31796100 | -1.64755200 | C         | -3.54429900 | 0.13415800  | 3.23041300  |
| H  | 4.75399300  | -1.00478200 | 0.04284700  | H         | -2.14220200 | 0.91357300  | 1.78371600  |
| C  | 4.39305600  | -3.16154100 | -2.57267100 | C         | -4.41663600 | -0.90926000 | 3.55740000  |
| H  | 2.51010300  | -3.99775700 | -3.24407800 | H         | -5.26019200 | -2.79692600 | 2.91981600  |
| H  | 6.09281500  | -2.16107000 | -1.68507300 | H         | -3.40525100 | 0.97132900  | 3.91923700  |
| H  | 4.98680400  | -3.67066400 | -3.33628400 | H         | -4.96395100 | -0.89144300 | 4.50339000  |
| C  | 2.94048600  | -0.03248000 | 1.70102000  | C         | -2.08784900 | -2.62399600 | -1.09395500 |
| C  | 3.80216400  | -0.70211800 | 2.59093000  | C         | -2.59460100 | -2.95863300 | -2.36092300 |
| C  | 2.95599800  | 1.37007800  | 1.67022700  | C         | -1.50575200 | -3.63961300 | -0.31122900 |
| C  | 4.66869000  | 0.01731600  | 3.41603700  | C         | -2.52497800 | -4.27482500 | -2.83084200 |
| H  | 3.79443600  | -1.79300100 | 2.64488700  | H         | -3.04940600 | -2.19157100 | -2.98990800 |
| C  | 3.82407000  | 2.08893200  | 2.49971700  | C         | -1.44824300 | -4.95439500 | -0.77871600 |
| H  | 2.28413000  | 1.91228900  | 1.00476900  | H         | -1.09704000 | -3.40483600 | 0.67351600  |
| C  | 4.68236100  | 1.41633400  | 3.37146800  | C         | -1.95562700 | -5.27706800 | -2.04215200 |
| H  | 5.33251700  | -0.51670100 | 4.10117700  | H         | -2.92413700 | -4.51485200 | -3.81985500 |
| H  | 3.81712700  | 3.18082300  | 2.45938500  | H         | -0.99864300 | -5.72814600 | -0.15126500 |
| H  | 5.35819300  | 1.97837300  | 4.02157200  | H         | -1.90627900 | -6.30548500 | -2.40915900 |
| C  | 1.24760300  | -2.32345200 | 1.75565500  |           |             |             |             |
| C  | 1.74252900  | -3.63669500 | 1.70298400  | <b>28</b> |             |             |             |

|    |             |             |             |   |             |             |             |
|----|-------------|-------------|-------------|---|-------------|-------------|-------------|
| C  | -5.36307300 | -0.39366900 | -2.94186800 | C | -1.34701100 | -3.33079500 | -0.51671800 |
| O  | -6.56901200 | -0.46304600 | -3.11108800 | C | -0.16360800 | -5.39045300 | -1.98472200 |
| C  | -4.75911800 | -0.20676400 | -1.60181600 | H | 1.70786100  | -4.38874300 | -1.61388600 |
| C  | -3.37687800 | -0.11570800 | -1.26545700 | C | -2.13582400 | -4.35687100 | -1.04457400 |
| H  | -2.52203500 | -0.17284400 | -1.93383100 | H | -1.80663000 | -2.51292400 | 0.04329000  |
| C  | -5.44543100 | -0.10060300 | -0.39177100 | C | -1.54702500 | -5.38814800 | -1.78270200 |
| O  | -4.57884900 | 0.04808500  | 0.61268000  | H | 0.30515300  | -6.19239700 | -2.56139800 |
| C  | -4.40411500 | -0.50133500 | -4.11430100 | H | -3.21709100 | -4.34387400 | -0.88431700 |
| H  | -3.78482100 | 0.40696000  | -4.19536700 | H | -2.16469100 | -6.18630600 | -2.20292000 |
| H  | -3.71671300 | -1.35221100 | -3.97734000 | C | 2.63269900  | -2.09090700 | -0.89095800 |
| H  | -4.98038700 | -0.63759200 | -5.03831600 | C | 3.79762600  | -2.66626700 | -0.35651800 |
| C  | -6.89065900 | -0.13045200 | -0.05001500 | C | 2.67862000  | -1.56539600 | -2.19571700 |
| H  | -7.19054300 | 0.81184500  | 0.43905500  | C | 4.97644600  | -2.71632300 | -1.10979700 |
| H  | -7.47952000 | -0.27420600 | -0.96245600 | H | 3.78917800  | -3.07958000 | 0.65374500  |
| H  | -7.10015000 | -0.94519600 | 0.66328100  | C | 3.85173100  | -1.62664000 | -2.95060300 |
| C  | -3.26946800 | 0.04790000  | 0.10681000  | H | 1.79051400  | -1.09378300 | -2.62377600 |
| C  | -2.13500500 | 0.13725600  | 0.97080900  | C | 5.00713400  | -2.20030200 | -2.40806500 |
| C  | -2.39561600 | 0.37068200  | 2.40687100  | H | 5.87409400  | -3.16691500 | -0.67764700 |
| C  | -1.69451400 | -0.36992800 | 3.38644400  | H | 3.86477700  | -1.21312900 | -3.96210300 |
| C  | -3.28632500 | 1.37261500  | 2.86397400  | H | 5.92856900  | -2.24140300 | -2.99469700 |
| C  | -1.88955900 | -0.13871900 | 4.74789900  | C | 0.25772600  | 3.56700500  | -0.10414800 |
| H  | -0.99238600 | -1.13782100 | 3.05592500  | C | 0.61090000  | 4.71286000  | -0.83819100 |
| C  | -3.44935000 | 1.62807400  | 4.22624100  | C | -0.76216400 | 3.66635000  | 0.85571000  |
| H  | -3.84135000 | 1.96884400  | 2.13757500  | C | -0.04028500 | 5.92886200  | -0.61292900 |
| C  | -2.76115600 | 0.86818500  | 5.17783300  | H | 1.39589300  | 4.65983300  | -1.59538700 |
| H  | -1.34397900 | -0.74115200 | 5.47927900  | C | -1.40339100 | 4.88696400  | 1.08988000  |
| H  | -4.13011800 | 2.42122000  | 4.54842400  | H | -1.06159900 | 2.77555700  | 1.41251100  |
| H  | -2.90074200 | 1.06101600  | 6.24472900  | C | -1.04683700 | 6.02027900  | 0.35399700  |
| Pd | -0.24480200 | 0.06061200  | 0.29147900  | H | 0.24072300  | 6.80934500  | -1.19702700 |
| P  | 1.03278700  | -1.94195200 | 0.04247900  | H | -2.19126600 | 4.94529700  | 1.84528700  |
| P  | 1.10576600  | 1.92558200  | -0.33393900 | H | -1.55497100 | 6.97234700  | 0.52886200  |
| C  | 1.47981300  | -2.58756300 | 1.72092700  | C | 1.62986100  | 2.02538900  | -2.11035500 |
| C  | 2.05401700  | -1.68673000 | 2.63740600  | C | 2.87951200  | 2.49745700  | -2.54364100 |
| C  | 1.24711500  | -3.91117100 | 2.12880100  | C | 0.69683900  | 1.60551500  | -3.07622800 |
| C  | 2.40113500  | -2.10515800 | 3.92392100  | C | 3.18691100  | 2.54816900  | -3.90798400 |
| H  | 2.22542700  | -0.64842800 | 2.34202500  | H | 3.62314200  | 2.82696700  | -1.81540400 |
| C  | 1.58448900  | -4.32458500 | 3.42234700  | C | 1.00071300  | 1.66451800  | -4.43809900 |
| H  | 0.79705800  | -4.62551700 | 1.43693200  | H | -0.27489900 | 1.22478200  | -2.75021200 |
| C  | 2.16390600  | -3.42560000 | 4.32152200  | C | 2.25006100  | 2.13420000  | -4.85862500 |
| H  | 2.84946000  | -1.39264100 | 4.62111200  | H | 4.16523200  | 2.91740600  | -4.22722400 |
| H  | 1.39168400  | -5.35684500 | 3.72652300  | H | 0.26157500  | 1.33783800  | -5.17439200 |
| H  | 2.42609400  | -3.75105800 | 5.33163500  | H | 2.49144700  | 2.17663100  | -5.92390700 |
| C  | 0.04602400  | -3.32814500 | -0.70670600 | C | 2.68138000  | 2.17013800  | 0.61320200  |
| C  | 0.62881000  | -4.36984400 | -1.44999600 | C | 2.84302100  | 3.20161100  | 1.55361300  |

|                                       |             |             |             |                                       |             |             |             |
|---------------------------------------|-------------|-------------|-------------|---------------------------------------|-------------|-------------|-------------|
| C                                     | 3.71859000  | 1.22902500  | 0.46303300  | H                                     | -4.34606800 | -4.05481800 | 3.49501200  |
| C                                     | 4.01163400  | 3.29260400  | 2.31793200  | Cu                                    | -0.11047700 | -0.01813900 | 0.01683500  |
| H                                     | 2.05347200  | 3.94158200  | 1.69458000  |                                       |             |             |             |
| C                                     | 4.88900600  | 1.33000700  | 1.21787800  | <b>Ag<sup>+</sup>-PPh<sub>3</sub></b> |             |             |             |
| H                                     | 3.61484600  | 0.41080400  | -0.25229600 | P                                     | -2.52466300 | 0.00022600  | 0.00088200  |
| C                                     | 5.03902700  | 2.36116500  | 2.15190100  | C                                     | -3.15811200 | 1.64260400  | 0.48618100  |
| H                                     | 4.11671400  | 4.10175100  | 3.04558600  | C                                     | -2.57564500 | 2.30343200  | 1.58343200  |
| H                                     | 5.68407300  | 0.59297900  | 1.07827900  | C                                     | -4.22715900 | 2.24135500  | -0.20157300 |
| H                                     | 5.95238600  | 2.43615200  | 2.74772800  | C                                     | -3.06550500 | 3.54351500  | 1.99375200  |
|                                       |             |             |             | H                                     | -1.74011700 | 1.84994500  | 2.12553400  |
|                                       |             |             |             | C                                     | -4.70904900 | 3.48659900  | 0.21334300  |
| <b>Cu<sup>+</sup>-PPh<sub>3</sub></b> |             |             |             | H                                     | -4.68495600 | 1.74202300  | -1.05764200 |
| P                                     | -2.33301200 | -0.00194100 | 0.00124500  | C                                     | -4.13173300 | 4.13685600  | 1.30730600  |
| C                                     | -2.96389800 | 1.62903900  | 0.52322400  | H                                     | -2.61103400 | 4.05147800  | 2.84733500  |
| C                                     | -2.32899300 | 2.28743500  | 1.59187100  | H                                     | -5.53984800 | 3.94913900  | -0.32436500 |
| C                                     | -4.07127600 | 2.22349400  | -0.10376000 | H                                     | -4.50952900 | 5.11151000  | 1.62487500  |
| C                                     | -2.80621800 | 3.52017400  | 2.03768300  | C                                     | -3.17282600 | -0.39385900 | -1.66017300 |
| H                                     | -1.46062900 | 1.83659200  | 2.08247400  | C                                     | -4.24642500 | -1.28422300 | -1.83014200 |
| C                                     | -4.54051900 | 3.46180700  | 0.34509800  | C                                     | -2.59476600 | 0.22606800  | -2.78340800 |
| H                                     | -4.56715000 | 1.72695300  | -0.94033400 | C                                     | -4.73726600 | -1.54289200 | -3.11360800 |
| C                                     | -3.91215300 | 4.10863500  | 1.41293700  | H                                     | -4.70060300 | -1.77596100 | -0.96782800 |
| H                                     | -2.31088600 | 4.02650800  | 2.86926900  | C                                     | -3.09335200 | -0.03407400 | -4.05998800 |
| H                                     | -5.40100000 | 3.92244700  | -0.14551100 | H                                     | -1.75578700 | 0.91868300  | -2.66508400 |
| H                                     | -4.28077300 | 5.07766500  | 1.75735100  | C                                     | -4.16430800 | -0.92057700 | -4.22584400 |
| C                                     | -2.96660100 | -0.35686800 | -1.67285800 | H                                     | -5.57169100 | -2.23611800 | -3.24185500 |
| C                                     | -4.08792300 | -1.17872500 | -1.87440000 | H                                     | -2.64220200 | 0.45107000  | -4.92847600 |
| C                                     | -2.32142800 | 0.22848100  | -2.77726000 | H                                     | -4.54904400 | -1.12912400 | -5.22684700 |
| C                                     | -4.56086300 | -1.40117700 | -3.17126100 | C                                     | -3.17714800 | -1.23571800 | 1.17651100  |
| H                                     | -4.59137700 | -1.64718800 | -1.02617200 | C                                     | -4.22077800 | -0.91939500 | 2.06243600  |
| C                                     | -2.80216900 | 0.00586000  | -4.06779800 | C                                     | -2.62899800 | -2.53192900 | 1.17708900  |
| H                                     | -1.44213200 | 0.86379000  | -2.63171500 | C                                     | -4.71257800 | -1.89687700 | 2.93313400  |
| C                                     | -3.92233900 | -0.81026800 | -4.26511100 | H                                     | -4.65145200 | 0.08359900  | 2.07737600  |
| H                                     | -5.43228900 | -2.04169100 | -3.32512400 | C                                     | -3.12850300 | -3.50229200 | 2.04578000  |
| H                                     | -2.29887900 | 0.46410600  | -4.92216700 | H                                     | -1.81329300 | -2.79027400 | 0.49486600  |
| H                                     | -4.29408900 | -0.98989500 | -5.27657300 | C                                     | -4.16996200 | -3.18448600 | 2.92602700  |
| C                                     | -2.98900000 | -1.26770200 | 1.14124200  | H                                     | -5.52382400 | -1.64698700 | 3.62066800  |
| C                                     | -4.06336900 | -0.99672200 | 2.00416300  | H                                     | -2.70089500 | -4.50743200 | 2.04075400  |
| C                                     | -2.40070000 | -2.54572700 | 1.13683500  | H                                     | -4.55515200 | -3.94337700 | 3.61104100  |
| C                                     | -4.54754600 | -2.00272100 | 2.84638200  | Ag                                    | -0.09290400 | -0.01970400 | -0.00355000 |
| H                                     | -4.52217700 | -0.00613200 | 2.02445400  |                                       |             |             |             |
| C                                     | -2.89258400 | -3.54536800 | 1.97613200  | <b>Pd-PPh<sub>3</sub></b>             |             |             |             |
| H                                     | -1.55804500 | -2.76512700 | 0.47373700  | Pd                                    | -0.00382700 | -0.00770000 | 2.57623800  |
| C                                     | -3.96617300 | -3.27342500 | 2.83272600  | P                                     | -0.00087700 | -0.00032600 | 0.36283500  |
| H                                     | -5.38282300 | -1.78882100 | 3.51709700  | C                                     | -1.55921100 | -0.61474000 | -0.43484100 |
| H                                     | -2.43416500 | -4.53685300 | 1.96748300  |                                       |             |             |             |

|            |             |             |             |    |             |             |             |
|------------|-------------|-------------|-------------|----|-------------|-------------|-------------|
| C          | -2.20519100 | -1.71804500 | 0.15084900  | H  | 6.12208700  | 1.37424200  | -1.96401900 |
| C          | -2.12035500 | -0.03307500 | -1.58330200 | H  | 5.18754300  | 1.44970900  | -4.27363100 |
| C          | -3.37335300 | -2.23897600 | -0.40877700 | C  | 2.59316300  | 0.30504000  | 1.63032500  |
| H          | -1.78818900 | -2.16021500 | 1.06023800  | C  | 3.50319100  | -0.47253500 | 2.36574500  |
| C          | -3.29832500 | -0.54854700 | -2.13570500 | C  | 2.23349200  | 1.58108500  | 2.09883600  |
| H          | -1.64038900 | 0.82926100  | -2.05050100 | C  | 4.05109800  | 0.02873500  | 3.55008000  |
| C          | -3.92529100 | -1.65307900 | -1.55346300 | H  | 3.78120900  | -1.47119900 | 2.02171700  |
| H          | -3.86169600 | -3.09877600 | 0.05741300  | C  | 2.78792800  | 2.07847800  | 3.27958100  |
| H          | -3.72656000 | -0.08145200 | -3.02661600 | H  | 1.51688700  | 2.19149300  | 1.54093200  |
| H          | -4.84613400 | -2.05310700 | -1.98587500 | C  | 3.69670400  | 1.30193200  | 4.00630300  |
| C          | 0.24671300  | 1.66083100  | -0.42428000 | H  | 4.75654400  | -0.58088200 | 4.11953100  |
| C          | 1.03898900  | 1.86482700  | -1.56593000 | H  | 2.50416200  | 3.07085400  | 3.63746600  |
| C          | -0.39261000 | 2.76720100  | 0.16315500  | H  | 4.12518100  | 1.68839500  | 4.93405700  |
| C          | 1.18231600  | 3.14623000  | -2.10993400 | C  | 1.95542100  | -2.11451900 | 0.08582100  |
| H          | 1.55269600  | 1.02312000  | -2.03487400 | C  | 2.88023800  | -2.83354800 | -0.68656800 |
| C          | -0.25830900 | 4.04293800  | -0.38790000 | C  | 1.05563300  | -2.80998100 | 0.91533300  |
| H          | -0.99005100 | 2.62023000  | 1.06754100  | C  | 2.90689200  | -4.23120900 | -0.62359700 |
| C          | 0.53267500  | 4.23654100  | -1.52596700 | H  | 3.58125500  | -2.30904800 | -1.33898700 |
| H          | 1.80696900  | 3.29004200  | -2.99560300 | C  | 1.09284000  | -4.20374800 | 0.98057200  |
| H          | -0.76385200 | 4.89194800  | 0.07973900  | H  | 0.33025900  | -2.26174800 | 1.52454100  |
| H          | 0.64731000  | 5.23684700  | -1.95166000 | C  | 2.01806600  | -4.91652500 | 0.20819900  |
| C          | 1.31441200  | -1.04025800 | -0.43031400 | H  | 3.62968500  | -4.78447000 | -1.22780000 |
| C          | 1.09420500  | -1.82404500 | -1.57457000 | H  | 0.39974300  | -4.73605600 | 1.63654100  |
| C          | 2.59272600  | -1.04051700 | 0.15592000  | H  | 2.04435200  | -6.00768300 | 0.25630600  |
| C          | 2.13205700  | -2.58678400 | -2.12193800 | Cu | -0.27165500 | 0.41768600  | -0.21212700 |
| H          | 0.10778800  | -1.84501100 | -2.04207800 | C  | -4.37874200 | -3.07937200 | -0.39634200 |
| C          | 3.63029300  | -1.79224100 | -0.39855100 | O  | -5.39709200 | -3.57671400 | 0.03823600  |
| H          | 2.76409500  | -0.45224500 | 1.06197900  | C  | -4.10366600 | -1.61009100 | -0.19734500 |
| C          | 3.40158900  | -2.57075400 | -1.53874400 | C  | -2.88714400 | -1.10020200 | -0.55780100 |
| H          | 1.94405500  | -3.19676300 | -3.00955500 | H  | -2.14792500 | -1.77951400 | -0.99040300 |
| H          | 4.61881700  | -1.77979000 | 0.06804300  | C  | -5.12676100 | -0.66254600 | 0.40148800  |
| H          | 4.21036200  | -3.16865800 | -1.96693800 | O  | -4.84686100 | 0.52432300  | 0.42260200  |
|            |             |             |             | C  | -3.36850400 | -3.93007200 | -1.14831900 |
|            |             |             |             | H  | -3.17849600 | -3.53719600 | -2.15968100 |
|            |             |             |             | H  | -2.40401700 | -3.97701600 | -0.61693400 |
|            |             |             |             | H  | -3.77568600 | -4.94561900 | -1.22716100 |
|            |             |             |             | C  | -6.43519600 | -1.15764900 | 0.95305700  |
|            |             |             |             | H  | -7.02142300 | -1.66304800 | 0.17111300  |
|            |             |             |             | H  | -6.27518200 | -1.91491500 | 1.73430600  |
|            |             |             |             | H  | -6.98672300 | -0.29639800 | 1.35115300  |
|            |             |             |             | C  | -2.46748600 | 0.24607800  | -0.43638400 |
|            |             |             |             | C  | -2.06102400 | 1.42596500  | -0.45072200 |
|            |             |             |             | C  | -2.08237500 | 2.85639000  | -0.35886200 |
|            |             |             |             | C  | -0.98930300 | 3.64835000  | -0.77560400 |
| <b>29a</b> |             |             |             |    |             |             |             |
| P          | 1.86264800  | -0.28199700 | 0.05772800  |    |             |             |             |
| C          | 2.95276200  | 0.29112400  | -1.29850600 |    |             |             |             |
| C          | 2.42705400  | 0.34723500  | -2.60222300 |    |             |             |             |
| C          | 4.28756500  | 0.66608100  | -1.07473600 |    |             |             |             |
| C          | 3.23050400  | 0.75505700  | -3.66864700 |    |             |             |             |
| H          | 1.38609100  | 0.06687700  | -2.79023600 |    |             |             |             |
| C          | 5.08528600  | 1.08139200  | -2.14519800 |    |             |             |             |
| H          | 4.70666800  | 0.64031900  | -0.06675000 |    |             |             |             |
| C          | 4.56065000  | 1.12375500  | -3.44030100 |    |             |             |             |
| H          | 2.81583100  | 0.79172600  | -4.67872500 |    |             |             |             |

|            |             |             |             |            |             |             |             |
|------------|-------------|-------------|-------------|------------|-------------|-------------|-------------|
| C          | -3.24506700 | 3.47467000  | 0.15897200  | H          | -3.15052400 | -1.45446200 | 5.57637800  |
| C          | -1.05774300 | 5.03555800  | -0.67422900 | Ag         | 0.26139300  | 0.33545700  | -0.26807100 |
| H          | -0.09835000 | 3.17076300  | -1.19187200 | C          | 4.62260000  | -3.18735700 | -0.45267500 |
| C          | -3.29808200 | 4.86298200  | 0.25371400  | O          | 5.57405000  | -3.72163300 | 0.07911400  |
| H          | -4.08326700 | 2.84905700  | 0.47070500  | C          | 4.32303400  | -1.73230400 | -0.19325600 |
| C          | -2.20983000 | 5.64284900  | -0.15904200 | C          | 3.15670700  | -1.19243000 | -0.66076000 |
| H          | -0.21524800 | 5.64822200  | -1.00238100 | H          | 2.47386700  | -1.83611100 | -1.22095300 |
| H          | -4.19544600 | 5.34314100  | 0.65032500  | C          | 5.26887000  | -0.83346400 | 0.58150400  |
| H          | -2.26122000 | 6.73162400  | -0.08266900 | O          | 5.00645800  | 0.35689800  | 0.62225900  |
| <b>29b</b> |             |             |             | C          | 3.72269400  | -3.97734600 | -1.38852400 |
| P          | -2.06163800 | -0.28570300 | 0.07408800  | H          | 2.70190700  | -4.06902400 | -0.98285400 |
| C          | -3.21755700 | 1.03643600  | -0.45596800 | H          | 3.65211700  | -3.50639000 | -2.38159700 |
| C          | -2.93353900 | 2.36413000  | -0.08697300 | H          | 4.14731500  | -4.98324500 | -1.49458300 |
| C          | -4.37344800 | 0.75779700  | -1.20278000 | C          | 6.48302300  | -1.38026300 | 1.28087200  |
| C          | -3.80067200 | 3.39538100  | -0.45101400 | H          | 6.20956300  | -2.17744900 | 1.98728200  |
| H          | -2.03553300 | 2.59657300  | 0.49359900  | H          | 7.16785000  | -1.85076600 | 0.55966500  |
| C          | -5.23459800 | 1.79681900  | -1.57059800 | H          | 6.98144500  | -0.55142800 | 1.79960200  |
| H          | -4.60487100 | -0.26646300 | -1.50151400 | C          | 2.73106300  | 0.14873000  | -0.51289000 |
| C          | -4.95152200 | 3.11270900  | -1.19564100 | C          | 2.33921400  | 1.33070200  | -0.52615700 |
| H          | -3.57662100 | 4.42308400  | -0.15566600 | C          | 2.38192800  | 2.75910100  | -0.40615400 |
| H          | -6.13132000 | 1.57353700  | -2.15336400 | C          | 1.38145100  | 3.59488000  | -0.95016800 |
| H          | -5.62679200 | 3.92110600  | -1.48574700 | C          | 3.48807000  | 3.33253800  | 0.26557100  |
| C          | -2.51249200 | -1.79193900 | -0.87072300 | C          | 1.48501000  | 4.97786500  | -0.82240600 |
| C          | -3.28953900 | -2.81630400 | -0.30625500 | H          | 0.53623600  | 3.15541500  | -1.48599100 |
| C          | -2.07005200 | -1.91122500 | -2.20104600 | C          | 3.57610100  | 4.71706400  | 0.38709800  |
| C          | -3.62205100 | -3.94149900 | -1.06754900 | H          | 4.25917500  | 2.67561500  | 0.67164100  |
| H          | -3.63543200 | -2.74149500 | 0.72651300  | C          | 2.57915800  | 5.53956800  | -0.15272300 |
| C          | -2.41090900 | -3.03333600 | -2.95802800 | H          | 0.71499700  | 5.62308000  | -1.25094000 |
| H          | -1.46292100 | -1.12116800 | -2.65369600 | H          | 4.43043100  | 5.16014600  | 0.90372600  |
| C          | -3.18624400 | -4.05116700 | -2.39066600 | H          | 2.65724500  | 6.62503500  | -0.05505400 |
| H          | -4.22556600 | -4.73539500 | -0.62139500 | <b>29c</b> |             |             |             |
| H          | -2.06859800 | -3.11555000 | -3.99229700 | C          | -3.96487500 | -3.50011400 | 0.61437000  |
| H          | -3.44820300 | -4.93204900 | -2.98154200 | O          | -4.88999100 | -4.17936800 | 0.19919000  |
| C          | -2.43095400 | -0.62933900 | 1.83607200  | C          | -3.80230800 | -2.07023900 | 0.21498700  |
| C          | -3.65628200 | -0.26253800 | 2.41746700  | C          | -2.76157900 | -1.34010100 | 0.74556700  |
| C          | -1.46569900 | -1.29120000 | 2.61576900  | H          | -2.07620900 | -1.86244700 | 1.41798000  |
| C          | -3.91000000 | -0.56111900 | 3.75952400  | C          | -4.75836900 | -1.41822200 | -0.74645300 |
| H          | -4.41305500 | 0.25982900  | 1.82857000  | O          | -4.83196200 | -0.20125400 | -0.79138100 |
| C          | -1.72706900 | -1.59229600 | 3.95356800  | C          | -2.96426600 | -4.12716100 | 1.58020900  |
| H          | -0.50328600 | -1.57496400 | 2.17919200  | H          | -1.93572100 | -4.08975800 | 1.18803600  |
| C          | -2.94939500 | -1.22574100 | 4.52714400  | H          | -2.96679800 | -3.61462200 | 2.55517800  |
| H          | -4.86367900 | -0.27033700 | 4.20614300  | H          | -3.25631300 | -5.17450600 | 1.72763100  |
| H          | -0.97211300 | -2.10729800 | 4.55207800  | C          | -5.60328900 | -2.25664500 | -1.68163500 |

|    |             |             |             |               |             |             |             |
|----|-------------|-------------|-------------|---------------|-------------|-------------|-------------|
| H  | -5.01748300 | -3.05475800 | -2.16049600 | H             | 3.95312700  | -2.34854500 | 0.19681700  |
| H  | -6.39755000 | -2.76713900 | -1.11787700 | C             | 2.76219000  | -1.36838100 | 3.76601900  |
| H  | -6.04111900 | -1.58586700 | -2.43326400 | H             | 1.47183000  | 0.06184300  | 2.78282300  |
| C  | -2.40612500 | 0.00659600  | 0.52193900  | C             | 3.71234800  | -2.38132400 | 3.59794100  |
| C  | -2.28216700 | 1.26137900  | 0.43306400  | H             | 4.86957900  | -3.52580900 | 2.17256100  |
| C  | -2.74745500 | 2.62228600  | 0.34608800  | H             | 2.42144700  | -1.09588100 | 4.76822800  |
| C  | -1.92247600 | 3.70250800  | 0.72485100  | H             | 4.11823400  | -2.90317700 | 4.46841800  |
| C  | -4.05296700 | 2.88335600  | -0.12877000 |               |             |             |             |
| C  | -2.39266300 | 5.01217800  | 0.63702500  | <b>30a-ts</b> |             |             |             |
| H  | -0.91489000 | 3.49531600  | 1.09198400  | C             | 4.36981500  | -3.20898600 | -0.12755100 |
| C  | -4.51139200 | 4.19710200  | -0.21406500 | O             | 5.49569500  | -3.64514900 | 0.00913100  |
| H  | -4.67680400 | 2.04107400  | -0.43089000 | C             | 4.12294200  | -1.73463400 | -0.06060100 |
| C  | -3.68719900 | 5.26276200  | 0.16808300  | C             | 2.88010200  | -1.17216700 | -0.17441900 |
| H  | -1.74785900 | 5.84230100  | 0.93640800  | H             | 1.99882900  | -1.79827300 | -0.33244300 |
| H  | -5.52154300 | 4.39303600  | -0.58294000 | C             | 5.19572700  | -0.71799000 | 0.13618200  |
| H  | -4.05429200 | 6.29023900  | 0.09968400  | O             | 4.81596000  | 0.45450000  | 0.13740500  |
| Pd | -0.32567100 | 0.51111400  | 0.21760500  | C             | 3.19264200  | -4.13530700 | -0.36781000 |
| P  | 1.92043100  | -0.10715900 | -0.05782100 | H             | 2.44348400  | -4.04641900 | 0.43578100  |
| C  | 2.31935600  | -1.13830000 | -1.54143300 | H             | 2.69165900  | -3.90734900 | -1.32256600 |
| C  | 1.33663500  | -2.02362700 | -2.01566800 | H             | 3.56478600  | -5.16694500 | -0.39531200 |
| C  | 3.55457300  | -1.07217700 | -2.20834100 | C             | 6.63941700  | -1.06300900 | 0.32403800  |
| C  | 1.59023300  | -2.84041000 | -3.12067500 | H             | 6.76356100  | -1.73014900 | 1.19034300  |
| H  | 0.36222800  | -2.05839100 | -1.52066400 | H             | 7.00793600  | -1.63796700 | -0.53903500 |
| C  | 3.80370500  | -1.88464200 | -3.31859300 | H             | 7.21823100  | -0.14010700 | 0.45408700  |
| H  | 4.32528300  | -0.37841800 | -1.86485200 | C             | 2.66795700  | 0.21953400  | -0.11128500 |
| C  | 2.82437600  | -2.77240900 | -3.77444200 | C             | 2.05250900  | 1.33749000  | -0.14996200 |
| H  | 0.81608000  | -3.52369800 | -3.47908200 | C             | 2.21351800  | 2.77136200  | -0.12680500 |
| H  | 4.76703700  | -1.82051200 | -3.83130100 | C             | 1.10830100  | 3.62326600  | -0.35547100 |
| H  | 3.01979100  | -3.40459200 | -4.64447100 | C             | 3.48488900  | 3.34348400  | 0.12100100  |
| C  | 3.03465400  | 1.35832100  | -0.25244400 | C             | 1.26577100  | 5.00618900  | -0.33829500 |
| C  | 4.23705300  | 1.51913100  | 0.45396800  | H             | 0.12571000  | 3.18964300  | -0.56171800 |
| C  | 2.62988800  | 2.36782900  | -1.14559200 | C             | 3.63046500  | 4.72767000  | 0.14186200  |
| C  | 5.02157200  | 2.66257500  | 0.26439400  | H             | 4.33833100  | 2.68751500  | 0.29174200  |
| H  | 4.56553000  | 0.75343500  | 1.15975600  | C             | 2.52679600  | 5.56007500  | -0.08676100 |
| C  | 3.41874100  | 3.50310200  | -1.33899400 | H             | 0.40767800  | 5.65604600  | -0.52288600 |
| H  | 1.68658100  | 2.26386000  | -1.68975200 | H             | 4.61272800  | 5.16457400  | 0.33541300  |
| C  | 4.61735400  | 3.65412800  | -0.63263200 | H             | 2.65090100  | 6.64560400  | -0.07122500 |
| H  | 5.95400900  | 2.77598900  | 0.82359700  | P             | -1.91527300 | -0.23604400 | 0.02735900  |
| H  | 3.09207500  | 4.27713300  | -2.03819200 | C             | -2.35570200 | -0.88656900 | 1.68232200  |
| H  | 5.23147300  | 4.54649700  | -0.77825600 | C             | -3.13623900 | 1.07958100  | -0.35221700 |
| C  | 2.66256800  | -1.04504300 | 1.35486300  | C             | -2.20442800 | -1.58888300 | -1.17802700 |
| C  | 3.61486900  | -2.06485500 | 1.19534500  | C             | -1.34727100 | -1.47974700 | 2.46150100  |
| C  | 2.23411500  | -0.71165200 | 2.65230000  | C             | -3.66679400 | -0.81997600 | 2.18348400  |
| C  | 4.13328500  | -2.72986800 | 2.31171500  | C             | -4.19302600 | 0.88814300  | -1.25537700 |



|               |             |             |             |            |             |             |             |
|---------------|-------------|-------------|-------------|------------|-------------|-------------|-------------|
| H             | -1.66983400 | -2.44747500 | -4.39476900 | C          | -2.86555900 | -2.23270700 | 4.10907500  |
| H             | -4.29544500 | -4.44647900 | -1.61089800 | H          | -0.84392900 | -2.99163700 | 3.95660100  |
| H             | -3.78888400 | -2.25346600 | 5.12772200  | H          | -4.82084100 | -1.31368600 | 3.99243300  |
| H             | -5.51423600 | 4.21437900  | -1.19257900 | H          | -3.06450300 | -2.72301800 | 5.06560100  |
| H             | -3.21879600 | -4.32769200 | -3.85597800 | C          | -3.16390500 | 1.21734600  | -0.08180500 |
| <b>30c-ts</b> |             |             |             | C          | -4.38490300 | 1.11455900  | -0.76720600 |
| C             | 4.28054400  | -3.44331800 | -0.26897100 | C          | -2.84004300 | 2.43228400  | 0.54903100  |
| O             | 5.32300800  | -3.97112700 | 0.09034400  | C          | -5.26609800 | 2.20090700  | -0.81259100 |
| C             | 4.07023600  | -1.98911700 | -0.14462800 | H          | -4.65184600 | 0.18495900  | -1.27417900 |
| C             | 2.92396100  | -1.28895200 | -0.51838200 | C          | -3.72538900 | 3.51132500  | 0.51222400  |
| H             | 2.06050000  | -1.75885500 | -0.98673000 | H          | -1.88046200 | 2.53184000  | 1.06493500  |
| C             | 5.04296600  | -1.05558500 | 0.37171800  | C          | -4.94152600 | 3.39864400  | -0.17084000 |
| O             | 4.67527000  | 0.14844200  | 0.35591500  | H          | -6.21115300 | 2.10768000  | -1.35423500 |
| C             | 3.15407000  | -4.27641300 | -0.85988200 | H          | -3.46056500 | 4.44757000  | 1.01053900  |
| H             | 2.23340700  | -4.18181500 | -0.26149400 | H          | -5.63107500 | 4.24600600  | -0.20810600 |
| H             | 2.91304100  | -3.94834200 | -1.88409600 | C          | -2.53403100 | -1.38118600 | -1.22429500 |
| H             | 3.46831200  | -5.32770900 | -0.88012300 | C          | -3.41430200 | -2.43444400 | -0.92744000 |
| C             | 6.39796100  | -1.41489300 | 0.89691000  | C          | -2.06516000 | -1.23973800 | -2.54291600 |
| H             | 6.30511100  | -2.13125500 | 1.72705700  | C          | -3.82246300 | -3.32102700 | -1.93017100 |
| H             | 6.97576800  | -1.94156400 | 0.12253400  | H          | -3.78191100 | -2.57103600 | 0.09164700  |
| H             | 6.92234800  | -0.50747600 | 1.22360400  | C          | -2.48366900 | -2.11804900 | -3.54486300 |
| C             | 2.90001800  | 0.09083700  | -0.31197200 | H          | -1.35701500 | -0.43911700 | -2.77566200 |
| C             | 2.21369800  | 1.21548200  | -0.40997100 | C          | -3.36237600 | -3.16335800 | -3.24014500 |
| C             | 2.54446100  | 2.62686400  | -0.30261800 | H          | -4.50372700 | -4.13959100 | -1.68306400 |
| C             | 1.55290900  | 3.59154800  | -0.60077500 | H          | -2.11321600 | -1.99243900 | -4.56564000 |
| C             | 3.82276000  | 3.08520400  | 0.10184200  | H          | -3.68201500 | -3.85773900 | -4.02156700 |
| C             | 1.81899500  | 4.95524500  | -0.48686500 | <b>31a</b> |             |             |             |
| H             | 0.57308100  | 3.23907700  | -0.93088900 | Cu         | 0.19985800  | 0.56161600  | -0.01022400 |
| C             | 4.08448500  | 4.44930600  | 0.20859000  | C          | 4.50099600  | -3.25803300 | -0.02986600 |
| H             | 4.59574300  | 2.35479200  | 0.33656200  | O          | 5.66072400  | -3.61574600 | -0.03058200 |
| C             | 3.08630900  | 5.38802900  | -0.08279400 | C          | 4.14949700  | -1.80319300 | -0.01106000 |
| H             | 1.03916800  | 5.68394300  | -0.72199300 | C          | 2.87690300  | -1.20811200 | -0.01067200 |
| H             | 5.07528100  | 4.78686500  | 0.52380200  | H          | 1.91310100  | -1.71322800 | -0.02892600 |
| H             | 3.29945500  | 6.45714900  | 0.00087100  | C          | 5.06278700  | -0.73100000 | -0.00532700 |
| Pd            | 0.27867800  | 0.50812700  | -0.20854000 | O          | 4.41147300  | 0.42756600  | 0.00002100  |
| P             | -1.92947500 | -0.16083300 | 0.03277700  | C          | 3.35432200  | -4.24408100 | -0.04899000 |
| C             | -2.35203100 | -0.96056000 | 1.65094600  | H          | 2.71251700  | -4.11443400 | 0.83806500  |
| C             | -1.36514300 | -1.74680900 | 2.27084800  | H          | 2.72238100  | -4.09148500 | -0.93948500 |
| C             | -3.59626800 | -0.81078100 | 2.28581000  | H          | 3.75889900  | -5.26374400 | -0.05969600 |
| C             | -1.62205900 | -2.38422600 | 3.48710600  | C          | 6.54174700  | -0.68836900 | -0.00151400 |
| H             | -0.38390400 | -1.84404700 | 1.79768800  | H          | 6.90004200  | -0.27331600 | 0.95681500  |
| C             | -3.84952000 | -1.44282000 | 3.50760900  | H          | 6.94432200  | -1.69881400 | -0.12756300 |
| H             | -4.37193900 | -0.19202500 | 1.82956600  | H          | 6.90412100  | -0.02079500 | -0.79979400 |



|   |             |             |             |            |             |             |             |
|---|-------------|-------------|-------------|------------|-------------|-------------|-------------|
| C | 3.03122800  | 0.18739700  | 0.00104400  | H          | -3.44049700 | -2.19695900 | 5.17405600  |
| C | 2.05234900  | 1.18521600  | -0.01862100 | H          | -5.68493400 | 3.93760200  | -1.30566400 |
| C | 2.32425400  | 2.60955600  | -0.01592200 | H          | -2.63207800 | -4.44056700 | -3.78421900 |
| C | 1.24078600  | 3.48095800  | -0.31930400 |            |             |             |             |
| C | 3.58159500  | 3.21074900  | 0.27797700  | <b>31b</b> |             |             |             |
| C | 1.39999300  | 4.86112700  | -0.35745100 | C          | 4.70322500  | -3.38056900 | -0.00233600 |
| H | 0.26499400  | 3.04246200  | -0.54634700 | O          | 5.87652500  | -3.69176000 | -0.04445900 |
| C | 3.73177500  | 4.59247500  | 0.26432300  | C          | 4.32302100  | -1.93704700 | -0.00872600 |
| H | 4.43484100  | 2.58637400  | 0.53252100  | C          | 3.05789700  | -1.33612200 | 0.02141600  |
| C | 2.64824300  | 5.42120100  | -0.06005800 | H          | 2.09161800  | -1.83558000 | 0.05419100  |
| H | 0.55448700  | 5.50454300  | -0.61001500 | C          | 5.24605600  | -0.87175000 | -0.06829400 |
| H | 4.70098800  | 5.03454600  | 0.50596200  | O          | 4.60835500  | 0.28885800  | -0.06100300 |
| H | 2.77769800  | 6.50630900  | -0.07537600 | C          | 3.58974000  | -4.40033000 | 0.05828500  |
| P | -1.94124400 | -0.19994100 | 0.01494100  | H          | 2.98355100  | -4.26141000 | 0.96878500  |
| C | -2.45899100 | -0.81292000 | 1.66433200  | H          | 2.91467200  | -4.29275400 | -0.80692000 |
| C | -3.16195400 | 1.09220300  | -0.44708900 | H          | 4.02336100  | -5.40809700 | 0.05923500  |
| C | -2.18713600 | -1.58652000 | -1.16432300 | C          | 6.72285400  | -0.86335900 | -0.14192000 |
| C | -1.47918000 | -1.35322700 | 2.51507900  | H          | 7.14615200  | -1.35932300 | 0.74643500  |
| C | -3.79574700 | -0.76636700 | 2.09492800  | H          | 7.06097700  | -1.46569300 | -0.99948400 |
| C | -4.19648700 | 0.86486000  | -1.36767200 | H          | 7.10194800  | 0.16351000  | -0.22092900 |
| C | -3.03856300 | 2.35780500  | 0.15573600  | C          | 3.22171400  | 0.06135200  | -0.00213600 |
| C | -1.55942200 | -1.50341700 | -2.42107100 | C          | 2.27145800  | 1.08107300  | -0.01365800 |
| C | -2.96689600 | -2.71310600 | -0.85773900 | C          | 2.60043500  | 2.49393000  | 0.00514200  |
| C | -1.83160500 | -1.85487200 | 3.76977000  | C          | 1.61456400  | 3.41987800  | -0.43523900 |
| H | -0.43261700 | -1.37600200 | 2.19716000  | C          | 3.83953400  | 3.02859500  | 0.46082200  |
| C | -4.14366700 | -1.26545000 | 3.35316800  | C          | 1.86117200  | 4.78760600  | -0.46773200 |
| H | -4.56648500 | -0.33510700 | 1.45215500  | H          | 0.64963100  | 3.03679000  | -0.77694000 |
| C | -5.09870200 | 1.88937600  | -1.67386000 | C          | 4.06845100  | 4.39964800  | 0.46300500  |
| H | -4.30132500 | -0.10910200 | -1.84993400 | H          | 4.61121500  | 2.36245500  | 0.83999900  |
| C | -3.94628800 | 3.37380600  | -0.14717700 | C          | 3.08918400  | 5.28252800  | -0.01240300 |
| H | -2.23413500 | 2.54917800  | 0.87252300  | H          | 1.09427400  | 5.47345600  | -0.83401400 |
| C | -1.72490400 | -2.52231400 | -3.36120800 | H          | 5.01813100  | 4.78951200  | 0.83627500  |
| H | -0.94330600 | -0.63448100 | -2.67181100 | H          | 3.28075500  | 6.35843600  | -0.01738600 |
| C | -3.12292600 | -3.73504800 | -1.79978200 | Ag         | 0.20508400  | 0.47839900  | -0.01196000 |
| H | -3.45247800 | -2.79875600 | 0.11641200  | P          | -2.13902800 | -0.19855400 | 0.01453600  |
| C | -3.16485600 | -1.81120000 | 4.18969300  | C          | -2.77452200 | -0.53804600 | 1.70344300  |
| H | -1.06329400 | -2.27211400 | 4.42499600  | C          | -3.25290000 | 1.08228700  | -0.68988100 |
| H | -5.18464100 | -1.22434100 | 3.68243500  | C          | -2.43543500 | -1.72509600 | -0.96494800 |
| C | -4.97732900 | 3.14081300  | -1.06454800 | C          | -1.90553600 | -1.10556300 | 2.65180100  |
| H | -5.90128200 | 1.70499200  | -2.39193700 | C          | -4.10303800 | -0.25989800 | 2.06697100  |
| H | -3.84812600 | 4.35122500  | 0.33128900  | C          | -4.26310700 | 0.77601700  | -1.61525000 |
| C | -2.50631400 | -3.64072800 | -3.05053200 | C          | -3.07794800 | 2.41552000  | -0.27544000 |
| H | -1.23994100 | -2.44527000 | -4.33731100 | C          | -1.80449700 | -1.84870400 | -2.21684400 |
| H | -3.73111500 | -4.60855000 | -1.55302800 | C          | -3.26528600 | -2.76156600 | -0.50807700 |

|            |             |             |             |    |             |             |             |
|------------|-------------|-------------|-------------|----|-------------|-------------|-------------|
| C          | -2.36027100 | -1.40208400 | 3.93839300  | C  | 1.64399700  | 3.32411800  | -0.60237800 |
| H          | -0.86527500 | -1.31591800 | 2.38611400  | C  | 3.59701600  | 2.94205600  | 0.77854600  |
| C          | -4.55231300 | -0.55307700 | 3.35780100  | C  | 1.93102500  | 4.68702600  | -0.63253900 |
| H          | -4.78885800 | 0.19053500  | 1.34630800  | H  | 0.76621600  | 2.92684900  | -1.11661900 |
| C          | -5.08740000 | 1.79018400  | -2.11445200 | C  | 3.85200100  | 4.31302000  | 0.78849000  |
| H          | -4.41037800 | -0.25222200 | -1.95131300 | H  | 4.25027500  | 2.27355000  | 1.33984700  |
| C          | -3.90843300 | 3.42216700  | -0.77043700 | C  | 3.03135400  | 5.19034000  | 0.07164000  |
| H          | -2.29463800 | 2.66944700  | 0.44521900  | H  | 1.28098700  | 5.36565800  | -1.19099600 |
| C          | -2.01352100 | -2.98287800 | -3.00361600 | H  | 4.70413200  | 4.70015100  | 1.35363000  |
| H          | -1.15111700 | -1.05178700 | -2.58488100 | H  | 3.24313400  | 6.26282900  | 0.06929700  |
| C          | -3.46432800 | -3.89978700 | -1.29633200 | Pd | 0.20562800  | 0.39900100  | 0.22357500  |
| H          | -3.75795200 | -2.68598200 | 0.46325800  | P  | -2.05441200 | -0.19562200 | 0.01926400  |
| C          | -3.68453000 | -1.12471800 | 4.29301200  | C  | -2.86781300 | -0.75046700 | 1.58966600  |
| H          | -1.67745200 | -1.84317700 | 4.66835500  | C  | -2.10642700 | -1.53694700 | 2.47301900  |
| H          | -5.58597000 | -0.33102800 | 3.63351600  | C  | -4.18366100 | -0.41322300 | 1.94638400  |
| C          | -4.91331700 | 3.11089800  | -1.69351100 | C  | -2.65476000 | -1.99237600 | 3.67390100  |
| H          | -5.87021500 | 1.54308100  | -2.83547900 | H  | -1.07128700 | -1.78025500 | 2.21735900  |
| H          | -3.76953100 | 4.45362000  | -0.43779400 | C  | -4.72844300 | -0.86278700 | 3.15411900  |
| C          | -2.84300700 | -4.01153500 | -2.54300000 | H  | -4.78811000 | 0.20845800  | 1.28266100  |
| H          | -1.52513400 | -3.06574300 | -3.97753300 | C  | -3.96806000 | -1.65521100 | 4.01817100  |
| H          | -4.11097300 | -4.70173200 | -0.93227600 | H  | -2.05003600 | -2.60288500 | 4.34960100  |
| H          | -4.03893200 | -1.34953800 | 5.30179200  | H  | -5.75287400 | -0.58889000 | 3.42011100  |
| H          | -5.55928400 | 3.90007800  | -2.08549400 | H  | -4.39474900 | -2.00295700 | 4.96261600  |
| H          | -3.00262300 | -4.90152300 | -3.15640500 | C  | -3.16047300 | 1.16800300  | -0.57278800 |
|            |             |             |             | C  | -4.25240500 | 0.96791100  | -1.43275300 |
| <b>31c</b> |             |             |             | C  | -2.87213300 | 2.47224400  | -0.13255800 |
| C          | 4.92549000  | -3.26300200 | 0.04893300  | C  | -5.04544100 | 2.04845900  | -1.83424200 |
| O          | 6.10861800  | -3.51504700 | -0.10437200 | H  | -4.48505000 | -0.03472400 | -1.79763700 |
| C          | 4.43474100  | -1.86649700 | 0.01560600  | C  | -3.67153900 | 3.54797300  | -0.52563900 |
| C          | 3.11725600  | -1.36688000 | 0.15925000  | H  | -2.00496700 | 2.63950200  | 0.51296500  |
| H          | 2.19564500  | -1.92127000 | 0.31900200  | C  | -4.75992500 | 3.33867300  | -1.37942800 |
| C          | 5.24237200  | -0.74372800 | -0.20020700 | H  | -5.88989200 | 1.87891900  | -2.50760700 |
| O          | 4.50705400  | 0.36222800  | -0.17727100 | H  | -3.43670800 | 4.55553400  | -0.17253700 |
| C          | 3.90020300  | -4.35540500 | 0.27858400  | H  | -5.38004400 | 4.18163600  | -1.69556400 |
| H          | 3.38115000  | -4.20578500 | 1.23959200  | C  | -2.41349900 | -1.57831000 | -1.16104300 |
| H          | 3.13011900  | -4.33725400 | -0.51004400 | C  | -3.40840300 | -2.54649600 | -0.94814500 |
| H          | 4.40398700  | -5.33034300 | 0.27963500  | C  | -1.63043200 | -1.65405400 | -2.32684900 |
| C          | 6.70058200  | -0.60939100 | -0.44524500 | C  | -3.62082000 | -3.56268500 | -1.88630100 |
| H          | 7.27200300  | -1.00981600 | 0.40689700  | H  | -4.01926700 | -2.51424300 | -0.04333300 |
| H          | 7.00175800  | -1.21154900 | -1.31615500 | C  | -1.85162900 | -2.66255800 | -3.26750400 |
| H          | 6.96119200  | 0.44498100  | -0.60806300 | H  | -0.83438700 | -0.92054100 | -2.48432800 |
| C          | 3.15977100  | 0.01997700  | 0.05022800  | C  | -2.84709000 | -3.62096700 | -3.04862400 |
| C          | 2.12555200  | 0.98589300  | 0.10236200  | H  | -4.39553100 | -4.31257200 | -1.70513700 |
| C          | 2.48086500  | 2.41200300  | 0.08483400  | H  | -1.23684700 | -2.70636300 | -4.17041100 |

H -3.01454100 -4.41605300 -3.77998400
